# Supplementary material for: Efficient microwave-assisted selective alkaline hydrolysis of diversely substituted phosphonate esters
Source: Royal Society of Chemistry journal article supplement (doi:10.1039/d2gc02288e), 2022-01-01
Supplement: d2gc02288e1.pdf [file d2gc02288e1.pdf]

## SUPPORTING INFORMATION

### Efficient microwave-assisted selective alkaline hydrolysis of diversely substituted phosphonate esters.

Lucas Mele,<sup>a</sup> Raphael El Bekri Saudain,<sup>a</sup> Jean-Luc Pirat,<sup>a</sup> Tahar Ayad<sup>\*a</sup> and David Virieux<sup>\*a</sup>

<sup>a</sup> ICGM Univ Montpellier, CNRS, ENSCM, Montpellier, France

\* E-mail: [david.virieux@enscm.fr](mailto:david.virieux@enscm.fr), [tahar.ayad@enscm.fr](mailto:tahar.ayad@enscm.fr)

### Table of contents

|                                  |    |
|----------------------------------|----|
| 1. General Information .....     | 1  |
| 2. Procedures .....              | 2  |
| 3. Unsuccessful substrates ..... | 9  |
| 4. Thermal vs MW activation..... | 9  |
| 5. NMR data .....                | 10 |
| 6. Metrics .....                 | 37 |
| 7. References .....              | 39 |

### 1. General Information

Unless specified, all of the reagents and starting materials were purchased from Fluorochem<sup>®</sup>, TCI<sup>®</sup>, Alfa Aesar<sup>®</sup> or Sigma-Aldrich<sup>®</sup> and used as received. All NMR spectroscopy measurements were performed with a Bruker AC 400 MHz spectrometer and are calibrated using the residual proton in the deuterated solvent (CHCl<sub>3</sub> at 7.26 ppm <sup>1</sup>H NMR, 77.16 ppm <sup>13</sup>C NMR; DMSO at 2.50 ppm <sup>1</sup>H NMR, 39.52 ppm <sup>13</sup>C NMR; MeOH at 3.31 ppm <sup>1</sup>H NMR, 49.00 ppm <sup>13</sup>C NMR). The chemical shifts are reported in ppm, and the coupling constant (*J*) are reported in Hz. The following abbreviations were used to explain multiplicities: s = singlet, br s = broad singlet, d = doublet, t = triplet, q = quartet, p = pentuplet and m = multiplet. For <sup>13</sup>C

NMR (101 MHz) and  $^{31}\text{P}$  NMR (162 MHz) all spectra were decoupled from the proton unless stated otherwise. High-resolution mass spectra (HRMS) were recorded on an Agilent 6210 ESI (electrospray ionization) TOF (time of flight) mass spectrometer. Microwave reactions were performed using a CEM Discover SP<sup>®</sup> apparatus. The temperature of the mixture was determined using a volume-independent infrared (IR) temperature measurement.

## 2. Procedures

### Synthesis of starting materials

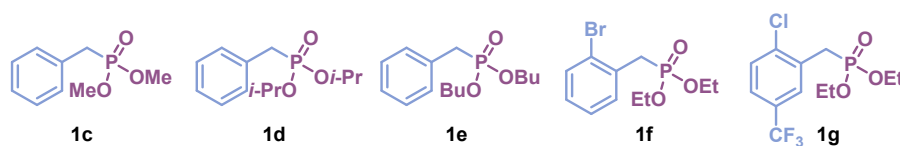

Starting materials **1c-g** are known and they were synthesized by an Arbuzov reaction following the procedure reported by Kekeç and co-workers.<sup>1</sup>

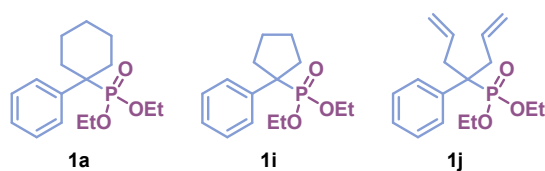

Starting materials **1a,i-j** are known and they were synthesized by an  $\alpha,\alpha'$ -dialkylation reaction following the procedure reported by Collignon and co-workers.<sup>2</sup>

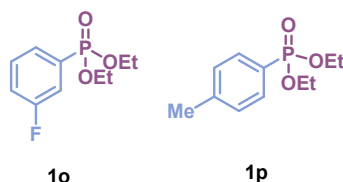

Starting materials **1o-p** are known and they were synthesized by Hirao coupling following the procedure reported by Stawinski and co-workers.<sup>3</sup>

### General procedure for the microwave assisted selective hydrolysis of substituted phosphonates

Substituted phosphonate (1.0 mmol, 1.0 eq), sodium hydroxide (2.4 mmol, 2.4 eq) and the appropriate alcohol (EtOH, MeOH, *i*-PrOH or *n*-BuOH, 1 mL) were placed in a 10 mL microwave reaction vial equipped with a magnetic stirrer. The microwave reaction vial was sealed with a rubber cap and then placed in the microwave oven to be heated at 200 W to reach the appropriate temperature reported in Table 1 usually within 30 s to 1 min 30. Full conversion for each substrate (monitored by  $^{31}\text{P}$  NMR analysis on the crude mixture with a DMSO- $d_6$

probe) were observed after the time described on Table 1. The reaction mixture was partitioned between EtOAc (5 mL) and 1N HCl (5 mL), decanted and the organic layer was washed with brine (5 mL). The combined aqueous layers were extracted with EtOAc (3 × 10 mL), then the combined organic layers were dried over MgSO<sub>4</sub> (1.5 g) and concentrated under reduced pressure to give the desired phosphonic acid monoester.

### **Greener procedure for the microwave assisted selective hydrolysis of substituted phosphonates**

Substituted phosphonate (1.0 mmol, 1.0 eq), sodium hydroxide (2.4 mmol, 2.4 eq) and the appropriate alcohol (EtOH, MeOH, *i*-PrOH or *n*-BuOH, 1 mL) were placed in a 10 mL microwave reaction vial along with a magnetic stirrer. The microwave reaction vial was sealed with a rubber cap and then placed in the microwave oven to be heated at 200 W to reach the appropriate temperature reported in Table 1 usually within 30 s to 1 min 30. Full conversion for each substrate (monitored by <sup>31</sup>P NMR analysis on the crude mixture with a DMSO-d<sub>6</sub> probe) were observed after the time described on Table 1. The reaction mixture was partitioned between EtOAc (5 mL) and citric acid 10%wt (5 mL). The aqueous layers were extracted with EtOAc (2 × 5 mL), then the combined organic layers were dried over MgSO<sub>4</sub> (1.5 g) and concentrated under reduced pressure to give the desired phosphonic acid monoester.

### **Grams scale procedure for the microwave assisted selective hydrolysis of **1b****

Diethyl benzylphosphonate **1b** (3.60 g, 15.8 mmol, 1.0 eq), sodium hydroxide (1.51 g, 37.8 mmol, 2.4 eq) and EtOH (16 mL) were placed in a 35 mL microwave reaction vial along with a magnetic stirrer. The microwave reaction vial was sealed with a rubber cap and then placed in the microwave oven to be heated at 200 W to reach 130 °C within 1 min 30. After 10 minutes of heating, full conversion was observed (monitored by <sup>31</sup>P NMR analysis on the crude mixture with a DMSO-d<sub>6</sub> probe). The reaction mixture was partitioned between EtOAc (80 mL) and 1N HCl (80 mL), decanted and the organic layer was washed with brine (80 mL). The combined aqueous layers were extracted with EtOAc (3 × 150 mL), then the combined organic layers were dried over MgSO<sub>4</sub> (20 g) and concentrated under reduced pressure to give the desired ethyl hydrogen benzylphosphonate **2b** as a white solid (2.95 g, 94%).

**Table 1:** Substrate scope

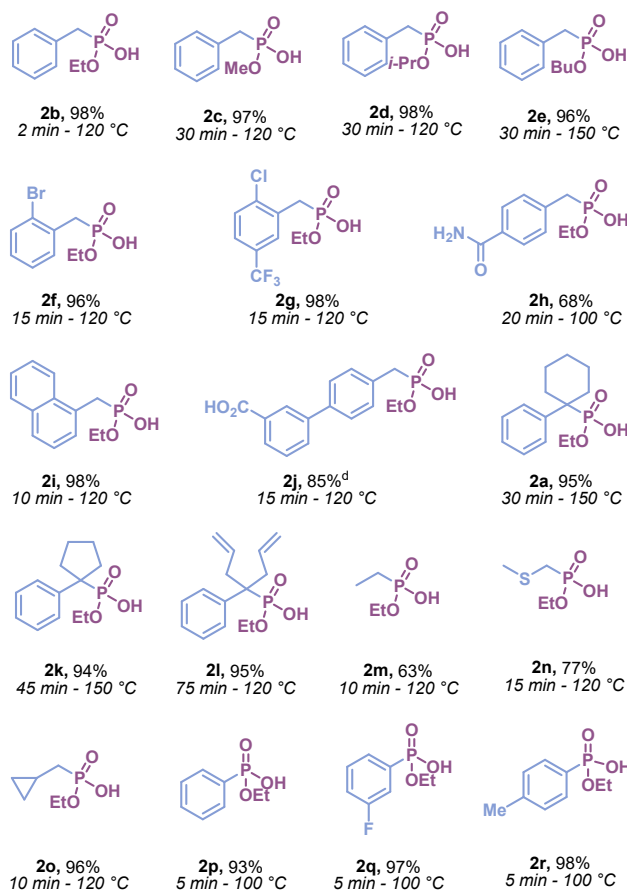

### Cyclohexylbenzylphosphonic acid monoethyl ester (**2a**)

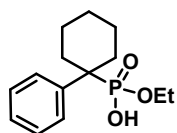

White solid (255 mg, 95%). <sup>1</sup>H NMR (400 MHz, MeOD) δ 7.53 – 7.44 (m, 2H, ArH), 7.40 – 7.31 (m, 2H, ArH), 7.30 – 7.18 (m, 1H, ArH), 3.88 – 3.75 (m, 2H, OCH<sub>2</sub>), 2.64 – 2.55 (m, 2H, CH<sub>2</sub>(C<sub>Y</sub>)), 2.05 – 1.94 (m, 2H, CH<sub>2</sub>(C<sub>Y</sub>)), 1.57 (m, 3H, CH<sub>2</sub>(C<sub>Y</sub>)), 1.41 – 1.22 (m, 3H, CH<sub>2</sub>(C<sub>Y</sub>)) 1.17 (t, *J* = 7.1 Hz, 3H, CH<sub>3</sub>). <sup>13</sup>C NMR (101 MHz, MeOD) δ 138.3 (d, *J* = 6.4 Hz), 130.6 (d, *J* = 5.4 Hz), 129.2 (d, *J* = 3.3 Hz), 127.4 (d, *J* = 3.7 Hz), 63.0 (d, *J* = 7.7 Hz), 45.1 (d, *J* = 136.7 Hz), 30.7 (d, *J* = 4.2 Hz), 27.3 (d, *J* = 1.4 Hz), 22.0 (d, *J* = 12.7 Hz), 16.7 (d, *J* = 5.9 Hz). <sup>31</sup>P NMR (162 MHz, MeOD) δ 29.3. HRMS (ESI-TOF): calc'd for C<sub>14</sub>H<sub>22</sub>O<sub>3</sub>P [M+H]<sup>+</sup>: 269.1301, found: 269.1305.

### Benzylphosphonic acid monoethyl ester (**2b**)

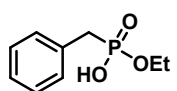

White solid (196 mg, 98%). <sup>1</sup>H NMR (400 MHz, CDCl<sub>3</sub>) δ 9.60 (br s, 1H, OH), 7.34 – 7.18 (m, 5H, ArH), 3.88 (dq, *J* = 8.1, 7.1 Hz, 2H, OCH<sub>2</sub>), 3.03 (d, *J* = 22.1 Hz, 2H, CH<sub>2</sub>P), 1.20 (t, *J* = 7.0 Hz, 3H, CH<sub>3</sub>). <sup>31</sup>P NMR (162 MHz, CDCl<sub>3</sub>) δ 29.4.

### Benzylphosphonic acid monomethyl ester (2c)

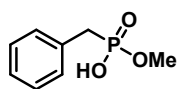

White solid (181 mg, 97%).  $^1\text{H}$  NMR (400 MHz,  $\text{CDCl}_3$ )  $\delta$  12.10 (br s, 1H, OH), 7.36 – 7.24 (m, 5H, ArH), 3.56 (d,  $J$  = 11.0 Hz, 3H,  $\text{OCH}_3$ ), 3.11 (d,  $J$  = 22.2 Hz, 2H,  $\text{CH}_2\text{P}$ ).  $^{13}\text{C}$  NMR (101 MHz,  $\text{CDCl}_3$ )  $\delta$  131.8 (d,  $J$  = 9.3 Hz), 129.9 (d,  $J$  = 6.5 Hz), 128.5 (d,  $J$  = 2.7 Hz), 126.8 (d,  $J$  = 3.4 Hz), 52.2 (d,  $J$  = 6.9 Hz), 33.4 (d,  $J$  = 140.2 Hz).  $^{31}\text{P}$  NMR (162 MHz,  $\text{CDCl}_3$ )  $\delta$  28.3. HRMS (ESI-TOF): calc'd for  $\text{C}_8\text{H}_{12}\text{O}_3\text{P}$   $[\text{M}+\text{H}]^+$ : 187.0519, found: 187.0521.

### Benzylphosphonic acid monoisopropyl ester (2d)

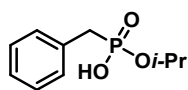

Light yellow solid (212 mg, 98%).  $^1\text{H}$  NMR (400 MHz,  $\text{CDCl}_3$ )  $\delta$  12.36 (br s, 1H, OH), 7.32 – 7.15 (m, 5H, ArH), 4.45 (dh,  $J$  = 7.8, 6.1 Hz, 1H, OCH), 3.01 (d,  $J$  = 22.1 Hz, 2H,  $\text{CH}_2\text{P}$ ), 1.18 (d,  $J$  = 6.2 Hz, 6H,  $(\text{CH}_3)_2$ ).  $^{13}\text{C}$  NMR (101 MHz,  $\text{CDCl}_3$ )  $\delta$  132.0 (d,  $J$  = 9.2 Hz), 129.9 (d,  $J$  = 6.6 Hz), 128.3 (d,  $J$  = 3.0 Hz), 126.6 (d,  $J$  = 3.6 Hz), 70.6 (d,  $J$  = 7.3 Hz), 34.3 (d,  $J$  = 140.8 Hz), 23.9 (d,  $J$  = 4.4 Hz).  $^{31}\text{P}$  NMR (162 MHz,  $\text{CDCl}_3$ )  $\delta$  27.3. HRMS (ESI-TOF): calc'd for  $\text{C}_{10}\text{H}_{16}\text{O}_3\text{P}$   $[\text{M}+\text{H}]^+$ : 215.0832, found: 215.0834.

### Benzylphosphonic acid n-monobutyl ester (2e)

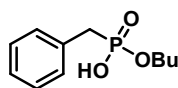

White solid (220 mg, 96%).  $^1\text{H}$  NMR (400 MHz,  $\text{CDCl}_3$ )  $\delta$  11.85 (br s, 1H, OH), 7.31 .16 (m, 5H, ArH), 3.83 (dt,  $J$  = 6.7, 6.7 Hz, 2H,  $\text{OCH}_2$ ), 3.05 (d,  $J$  = 22.3 Hz, 2H,  $\text{CH}_2\text{P}$ ), 1.56 – 1.47 (m, 2H,  $\text{CH}_2$ ), 1.34 – 1.24 (m, 2H,  $\text{CH}_2$ ), 0.86 (t,  $J$  = 7.4 Hz, 3H,  $\text{CH}_3$ ).  $^{13}\text{C}$  NMR (101 MHz,  $\text{CDCl}_3$ )  $\delta$  131.9 (d,  $J$  = 9.2 Hz), 129.9 (d,  $J$  = 6.6 Hz), 128.4 (d,  $J$  = 3.0 Hz), 126.7 (d,  $J$  = 3.5 Hz), 65.3 (d,  $J$  = 7.1 Hz), 33.8 (d,  $J$  = 140.1 Hz), 32.4 (d,  $J$  = 6.4 Hz), 18.6, 13.6.  $^{31}\text{P}$  NMR (162 MHz,  $\text{CDCl}_3$ )  $\delta$  27.6. HRMS (ESI-TOF): calc'd for  $\text{C}_{11}\text{H}_{18}\text{O}_3\text{P}$   $[\text{M}+\text{H}]^+$ : 229.0988, found: 229.0991.

### 2-Bromobenzylphosphonic acid monoethyl ester (2f)

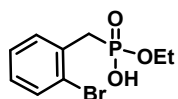

White solid (269 mg; 96%).  $^1\text{H}$  NMR (400 MHz,  $\text{CDCl}_3$ )  $\delta$  12.39 (br s, 1H, OH), 7.56 (d,  $J$  = 8.0 Hz, 1H, ArH), 7.46 (d,  $J$  = 7.6 Hz, 1H, ArH), 7.26 (t,  $J$  = 7.4 Hz, 1H, ArH), 7.10 (t,  $J$  = 7.7 Hz, 1H, ArH), 3.98 (dq,  $J$  = 7.2, 7.2 Hz, 2H,  $\text{OCH}_2$ ), 3.37 (d,  $J$  = 22.0 Hz, 2H,  $\text{CH}_2\text{P}$ ), 1.25 (t,  $J$  = 7.0 Hz, 3H,  $\text{CH}_3$ ).  $^{13}\text{C}$  NMR (101 MHz,  $\text{CDCl}_3$ )  $\delta$  132.9 (d,  $J$  = 2.2 Hz), 132.0 (d,  $J$  = 8.7 Hz), 131.7 (d,  $J$  = 4.7 Hz), 128.4 (d,  $J$  = 2.9 Hz), 127.4 (d,  $J$  = 2.7 Hz), 125.1 (d,  $J$  = 8.6 Hz), 62.0 (d,  $J$  = 6.3 Hz), 33.6 (d,  $J$  = 141.1 Hz), 16.3 (d,  $J$  = 5.9 Hz).  $^{31}\text{P}$  NMR (162 MHz,  $\text{CDCl}_3$ )  $\delta$  26.7. HRMS (ESI-TOF): calc'd for  $\text{C}_9\text{H}_{13}\text{BrO}_3\text{P}$   $[\text{M}+\text{H}]^+$ : 278.9780, found: 278.9784.

## 2-Chloro-5-trifluoromethylbenzylphosphonic acid monoethyl ester (2g)

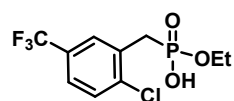

White solid (297 mg, 98%).  $^1\text{H}$  NMR (400 MHz,  $\text{CDCl}_3$ )  $\delta$  12.22 (br s, 1H, OH), 7.67 (s, 1H, ArH), 7.50 – 7.38 (m, 2H, ArH), 3.98 (dq,  $J = 7.2, 7.2$  Hz, 2H,  $\text{OCH}_2$ ), 3.35 (d,  $J = 23.1$  Hz, 2H,  $\text{CH}_2\text{P}$ ), 1.21 (t,  $J = 7.0$  Hz, 3H,  $\text{CH}_3$ ).  $^{13}\text{C}$  NMR (101 MHz,  $\text{CDCl}_3$ )  $\delta$  138.3 (d,  $J = 7.8$  Hz), 131.7 (d,  $J = 9.1$  Hz), 130.2 (d,  $J = 2.8$  Hz), 129.3 (qd,  $J = 33.3, 3.7$  Hz), 128.6 (dq,  $J = 5.0, 3.7$  Hz), 125.0 (q,  $J = 3.6$  Hz), 123.7 (q,  $J = 271.8$  Hz), 62.2 (d,  $J = 6.8$  Hz), 31.1 (d,  $J = 141.4$  Hz), 16.1 (d,  $J = 6.4$  Hz).  $^{31}\text{P}$  NMR (162 MHz,  $\text{CDCl}_3$ )  $\delta$  24.8. HRMS (ESI-TOF): calc'd for  $\text{C}_9\text{H}_9\text{ClF}_3\text{O}_3\text{P}$   $[\text{M}+\text{H}]^+$ : 303.0159, found: 303.0164.

## 4-Carbamoylbenzylphosphonic acid monoethyl ester (2h)

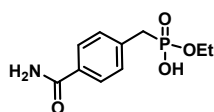

White solid (165 mg; 68%).  $^1\text{H}$  NMR (400 MHz, MeOD)  $\delta$  7.85 – 7.80 (m, 2H, ArH), 7.46 – 7.37 (m, 2H, ArH), 4.02 (dq,  $J = 7.9, 7.1$  Hz, 2H,  $-\text{OCH}_2$ ), 3.25 (d,  $J = 22.1$  Hz, 2H,  $\text{CH}_2\text{-P}$ ), 1.26 (t,  $J = 7.1$  Hz, 3H,  $-\text{CH}_3$ ).  $^{13}\text{C}$  NMR (101 MHz, MeOD)  $\delta$  172.06, 138.13 (d,  $J = 9.2$  Hz), 133.33 (d,  $J = 3.7$  Hz), 131.06 (d,  $J = 6.3$  Hz), 128.78 (d,  $J = 3.1$  Hz), 62.96 (d,  $J = 6.6$  Hz), 34.62 (d,  $J = 136.2$  Hz), 16.73 (d,  $J = 6.4$  Hz).  $^{31}\text{P}$  NMR (162 MHz, MeOD)  $\delta$  24.92. HRMS (ESI-TOF): calc'd for  $\text{C}_{10}\text{H}_{15}\text{NO}_4\text{P}$   $[\text{M}+\text{H}]^+$ : 244.0739, found: 244.0734.

## Naphthalen-1-ylmethylphosphonic acid monoethyl ester (2i)

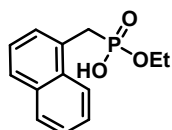

Light yellow solid (246 mg, 98%).  $^1\text{H}$  NMR (400 MHz,  $\text{CDCl}_3$ )  $\delta$  7.99 (d,  $J = 8.3$  Hz, 1H, ArH), 7.84 – 7.68 (m, 2H, ArH), 7.47 (dddd,  $J = 17.7, 8.0, 6.7, 1.4$  Hz, 2H, ArH), 7.43 – 7.30 (m, 2H, ArH), 3.69 (dq,  $J = 7.2, 7.2$  Hz, 2H,  $\text{OCH}_2$ ), 3.42 (d,  $J = 22.4$  Hz, 2H,  $\text{CH}_2\text{P}$ ), 1.06 (t,  $J = 7.1$  Hz, 3H,  $\text{CH}_3$ ).  $^{13}\text{C}$  NMR (101 MHz,  $\text{CDCl}_3$ )  $\delta$  133.8 (d,  $J = 2.9$  Hz), 132.0 (d,  $J = 5.1$  Hz), 128.7 (d,  $J = 7.6$  Hz), 128.5, 127.9 (d,  $J = 9.9$  Hz), 127.7 (d,  $J = 4.2$  Hz), 126.1, 125.7, 125.4 (d,  $J = 4.2$  Hz), 124.6 (d,  $J = 1.9$  Hz), 61.6 (d,  $J = 7.2$  Hz), 30.7 (d,  $J = 141.4$  Hz), 16.1 (d,  $J = 6.5$  Hz).  $^{31}\text{P}$  NMR (162 MHz,  $\text{CDCl}_3$ )  $\delta$  29.1. HRMS (ESI-TOF): calc'd for  $\text{C}_{13}\text{H}_{16}\text{O}_3\text{P}$   $[\text{M}+\text{H}]^+$ : 251.0832, found: 251.0835.

## 4'-((ethoxy(hydroxy)phosphoryl)methyl)-[1,1'-biphenyl]-3-carboxylic acid (2j)

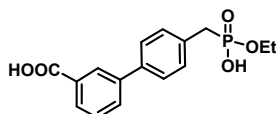

White solid (272 mg; 85%).  $^1\text{H}$  NMR (400 MHz, MeOD)  $\delta$  8.24 (t,  $J = 1.8$  Hz, 1H, ArH), 7.99 (dt,  $J = 7.8, 1.4$  Hz, 1H, ArH), 7.82 (ddd,  $J = 7.8, 2.0, 1.1$  Hz, 1H, ArH), 7.65 – 7.57 (m, 2H, ArH), 7.56 – 7.50 (m, 1H, ArH), 7.41 (dd,  $J = 8.3, 2.5$  Hz, 2H, ArH), 4.03 (dq,  $J = 7.9, 7.1$  Hz, 2H,  $-\text{OCH}_2$ ), 3.21 (d,  $J = 21.4$  Hz, 2H,  $\text{CH}_2\text{-P}$ ), 1.27 (t,  $J = 7.1$  Hz, 3H,  $-\text{CH}_3$ ).  $^{13}\text{C}$  NMR (101 MHz, MeOD)  $\delta$  169.70,

142.34, 139.87 (d,  $J = 3.9$  Hz), 133.37 (d,  $J = 9.4$  Hz), 132.52, 132.36, 131.61 (d,  $J = 6.5$  Hz), 130.10, 129.48 (d,  $J = 6.7$  Hz), 128.96, 128.03 (d,  $J = 3.2$  Hz), 62.93 (d,  $J = 6.5$  Hz), 34.30 (d,  $J = 136.5$  Hz), 16.76 (d,  $J = 6.3$  Hz).  $^{31}\text{P}$  NMR (162 MHz, MeOD)  $\delta$  25.80. HRMS (ESI-TOF): calc'd for  $\text{C}_{16}\text{H}_{18}\text{O}_5\text{P}$   $[\text{M}+\text{H}]^+$ : 321.0892, found: 321.0891.

### Cyclopentylbenzylphosphonic acid monoethyl ester (2k)

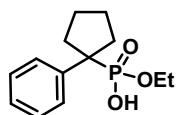

White solid (194 mg, 94%).  $^1\text{H}$  NMR (400 MHz, MeOD)  $\delta$  7.46 (ddd,  $J = 8.3$ , 2.7, 1.2 Hz, 2H, ArH), 7.33 – 7.25 (m, 2H, ArH), 7.23 – 7.14 (m, 1H, ArH), 3.82 (dq,  $J = 7.2$ , 7.2 Hz, 2H,  $\text{OCH}_2$ ), 2.49 – 2.13 (m, 4H, 2  $\text{CH}_2$ ), 1.89 – 1.75 (m, 2H,  $\text{CH}_2$ ), 1.64 – 1.48 (m, 2H,  $\text{CH}_2$ ), 1.15 (t,  $J = 7.1$  Hz, 3H,  $\text{CH}_3$ ).  $^{13}\text{C}$  NMR (101 MHz, MeOD)  $\delta$  142.4 (d,  $J = 4.3$  Hz), 129.7 (d,  $J = 5.1$  Hz), 128.9 (d,  $J = 3.2$  Hz), 127.5 (d,  $J = 3.4$  Hz), 62.9 (d,  $J = 7.5$  Hz), 52.2 (d,  $J = 139.6$  Hz), 35.6 (d,  $J = 1.1$  Hz), 25.2, 16.7 (d,  $J = 6.0$  Hz).  $^{31}\text{P}$  NMR (162 MHz, MeOD)  $\delta$  30.9. HRMS (ESI-TOF): calc'd for  $\text{C}_{13}\text{H}_{20}\text{O}_3\text{P}$   $[\text{M}+\text{H}]^+$ : 255.1145, found: 255.1148.

### Diallylbenzylphosphonic acid monoethyl ester (2l)

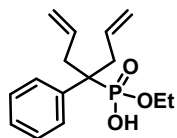

White solid (175 mg, 95%).  $^1\text{H}$  NMR (400 MHz,  $\text{CDCl}_3$ )  $\delta$  11.47 (br s, 1H, OH), 7.51 (ddd,  $J = 8.4$ , 2.6, 1.3 Hz, 2H, ArH), 7.32 (t,  $J = 7.6$  Hz, 2H, ArH), 7.27 – 7.12 (m, 1H, ArH), 5.82 (ddt,  $J = 17.0$ , 10.1, 6.9 Hz, 2H,  $\text{CH}_{\text{C}=\text{C}}$ ), 5.17 – 5.01 (m, 4H,  $\text{CH}_2(\text{C}=\text{C})$ ), 3.76 (dq,  $J = 7.2$ , 7.2 Hz, 2H,  $\text{OCH}_2$ ), 3.03 – 2.79 (m, 4H,  $\text{CH}_2(\text{allyl})$ ), 1.16 (t,  $J = 7.0$  Hz, 3H,  $\text{CH}_3$ ).  $^{13}\text{C}$  NMR (101 MHz,  $\text{CDCl}_3$ )  $\delta$  138.4 (d,  $J = 6.1$  Hz), 133.7 (d,  $J = 9.5$  Hz), 129.1 (d,  $J = 5.4$  Hz), 127.9 (d,  $J = 2.8$  Hz), 126.7 (d,  $J = 3.0$  Hz), 118.3, 61.8 (d,  $J = 7.9$  Hz), 45.1 (d,  $J = 137.7$  Hz), 37.0 (d,  $J = 2.8$  Hz), 16.2 (d,  $J = 6.1$  Hz).  $^{31}\text{P}$  NMR (162 MHz,  $\text{CDCl}_3$ )  $\delta$  32.2. HRMS (ESI-TOF): calc'd for  $\text{C}_{15}\text{H}_{22}\text{O}_3\text{P}$   $[\text{M}+\text{H}]^+$ : 281.1301, found: 281.1305.

### Ethylphosphonic acid monoethyl ester (2m)

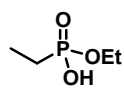

White solid (87 mg, 63%).  $^1\text{H}$  NMR (400 MHz,  $\text{CDCl}_3$ )  $\delta$  11.90 (br s, 1H, OH), 4.09 (dq,  $J = 7.3$ , 7.3 Hz, 2H,  $\text{OCH}_2$ ), 1.74 (dq,  $J = 18.6$ , 7.5 Hz, 2H,  $\text{CH}_2\text{P}$ ), 1.33 (t,  $J = 7.1$  Hz, 3H,  $\text{CH}_3$ ), 1.18 (dt,  $J = 20.1$ , 7.7 Hz, 3H,  $\text{CH}_3$ ).  $^{13}\text{C}$  NMR (101 MHz,  $\text{CDCl}_3$ )  $\delta$  61.1 (d,  $J = 6.7$  Hz), 19.1 (d,  $J = 145.0$  Hz), 16.4 (d,  $J = 6.4$  Hz), 6.4 (d,  $J = 6.6$  Hz).  $^{31}\text{P}$  NMR (162 MHz,  $\text{CDCl}_3$ )  $\delta$  35.8. HRMS (ESI-TOF): calc'd for  $\text{C}_4\text{H}_{12}\text{O}_3\text{P}$   $[\text{M}+\text{H}]^+$ : 139.0519, found: 139.0520.

### Methylthiomethylphosphonic acid monoethyl ester (2n)

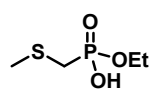

Colorless oil (131 mg, 77%). <sup>1</sup>H NMR (400 MHz, CDCl<sub>3</sub>) δ 10.03 (br s, 1H, OH), 4.23 – 4.14 (m, 2H, OCH<sub>2</sub>), 2.72 (d, *J* = 13.0 Hz, 2H, CH<sub>2</sub>P), 2.28 (d, *J* = 1.1 Hz, 3H, H<sub>3</sub>CS), 1.36 (t, *J* = 7.0 Hz, 3H, CH<sub>3</sub>). <sup>13</sup>C NMR (101 MHz, CDCl<sub>3</sub>) δ 62.4 (d, *J* = 7.2 Hz), 27.6 (d, *J* = 153.8 Hz), 17.4, 16.4 (d, *J* = 6.3 Hz). <sup>31</sup>P NMR (162 MHz, CDCl<sub>3</sub>) δ 27.7. HRMS (ESI-TOF): calc'd for C<sub>4</sub>H<sub>12</sub>O<sub>3</sub>PS [M+H]<sup>+</sup>: 171.0239, found: 171.0246.

### Cyclopropylmethylphosphonic acid monoethyl ester (2o)

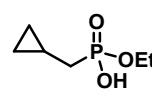

Colorless oil (157 mg, 96%). <sup>1</sup>H NMR (400 MHz, CDCl<sub>3</sub>) δ 9.81 (br s, 1H, OH), 4.11 (dq, *J* = 7.2, 7.2 Hz, 2H, OCH<sub>2</sub>), 1.70 (dd, *J* = 17.9, 7.1 Hz, 2H, CH<sub>2</sub>P), 1.33 (t, *J* = 7.0 Hz, 3H, CH<sub>3</sub>), 1.05 – 0.86 (m, 1H, CH), 0.57 (tdd, *J* = 6.0, 4.5, 1.4 Hz, 2H, CH<sub>2(c-Pr)</sub>), 0.23 (dt, *J* = 6.2, 4.7 Hz, 2H, CH<sub>2(c-Pr)</sub>). <sup>13</sup>C NMR (101 MHz, CDCl<sub>3</sub>) δ 61.1 (d, *J* = 6.7 Hz), 31.0 (d, *J* = 143.4 Hz), 16.4 (d, *J* = 6.3 Hz), 5.1 (d, *J* = 10.1 Hz), 4.2 (d, *J* = 5.2 Hz). <sup>31</sup>P NMR (162 MHz, CDCl<sub>3</sub>) δ 33.8. HRMS (ESI-TOF): calc'd for C<sub>6</sub>H<sub>14</sub>O<sub>3</sub>P [M+H]<sup>+</sup>: 165.0675, found: 165.0680.

### Phenylphosphonic acid monoethyl ester (2p)

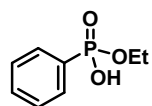

Brown oil (174 mg, 93%). <sup>1</sup>H NMR (400 MHz, CDCl<sub>3</sub>) δ 12.26 (br s, 1H, OH), 7.84 (dd, *J* = 13.7, 7.5 Hz, 2H, ArH), 7.54 (t, *J* = 7.6 Hz, 1H, ArH), 7.44 (dt, *J* = 11.2, 5.3 Hz, 2H, ArH), 4.07 (dq, *J* = 7.3, 7.3 Hz, 2H, OCH<sub>2</sub>), 1.29 (t, *J* = 7.1 Hz, 3H, CH<sub>3</sub>). <sup>13</sup>C NMR (101 MHz, CDCl<sub>3</sub>) δ 132.2 (d, *J* = 3.1 Hz), 131.5 (d, *J* = 10.1 Hz), 129.1 (d, *J* = 193.7 Hz), 128.4 (d, *J* = 15.3 Hz), 62.0 (d, *J* = 5.7 Hz), 16.3 (d, *J* = 6.8 Hz). <sup>31</sup>P NMR (162 MHz, CDCl<sub>3</sub>) δ 19.4. HRMS (ESI-TOF): calc'd for C<sub>8</sub>H<sub>12</sub>O<sub>3</sub>P [M+H]<sup>+</sup>: 187.0519, found: 187.0523.

### 3-Fluorophenylphosphonic acid monoethyl ester (2q)

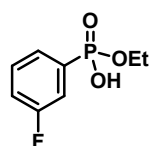

Brown oil (198 mg, 97%). <sup>1</sup>H NMR (400 MHz, DMSO) δ 7.61 – 7.50 (m, 2H, ArH), 7.48 – 7.38 (m, 2H, ArH), 3.95 – 3.85 (m, 2H, OCH<sub>2</sub>), 1.18 (t, *J* = 7.0 Hz, 3H, CH<sub>3</sub>). <sup>13</sup>C NMR (101 MHz, DMSO) δ 162.2 (dd, *J* = 246.4, 20.4 Hz), 135.1 (dd, *J* = 182.2, 5.9 Hz), 131.4 (dd, *J* = 16.5, 7.7 Hz), 127.6 (dd, *J* = 8.9, 3.0 Hz), 119.1 (dd, *J* = 20.8, 3.0 Hz), 117.9 (dd, *J* = 21.7, 10.5 Hz), 61.4 (d, *J* = 5.3 Hz), 16.7 (d, *J* = 6.3 Hz). <sup>31</sup>P NMR (162 MHz, DMSO) δ 12.5 (d, *J* = 8.3 Hz). HRMS (ESI-TOF): calc'd for C<sub>8</sub>H<sub>11</sub>FO<sub>3</sub>P [M+H]<sup>+</sup>: 205.0424, found: 205.0428.



#### 4-Methylphenylphosphonic acid monoethyl ester (2r)

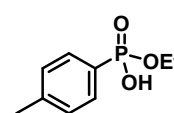 Brown oil (196 mg, 98%). <sup>1</sup>H NMR (400 MHz, DMSO) δ 7.59 (dd, *J* = 12.8, 8.1 Hz, 2H, ArH), 7.33 – 7.28 (m, 2H, ArH), 3.85 (dq, *J* = 7.9, 7.1 Hz, 2H, OCH<sub>2</sub>), 2.36 (s, 3H, CH<sub>3</sub>C<sub>q</sub>), 1.17 (t, *J* = 7.0 Hz, 3H, CH<sub>3</sub>). <sup>13</sup>C NMR (101 MHz, DMSO) δ 142.0 (d, *J* = 3.1 Hz), 131.5 (d, *J* = 10.1 Hz), 129.4 (d, *J* = 14.7 Hz), 128.6 (d, *J* = 185.0 Hz), 60.9 (d, *J* = 5.1 Hz), 21.6 (d, *J* = 1.3 Hz), 16.7 (d, *J* = 6.4 Hz). <sup>31</sup>P NMR (162 MHz, DMSO) δ 15.4. HRMS (ESI-TOF): calc'd for C<sub>9</sub>H<sub>14</sub>O<sub>3</sub>P [M+H]<sup>+</sup>: 201.0675, found: 201.0682.

### 3. Unsuccessful substrates

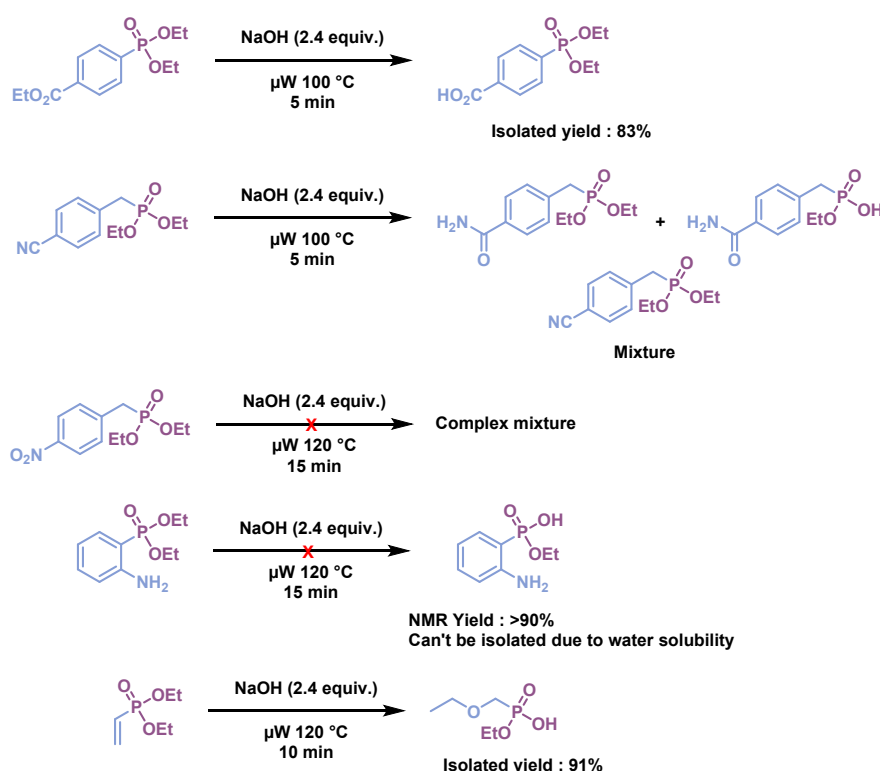

Figure 1: Unsuccessful substrates.

### 4. Thermal vs MW activation

#### General procedure for the microwave assisted selective hydrolysis of substituted phosphonates

Substituted phosphonate (1.0 mmol, 1.0 eq), sodium hydroxide (2.4 mmol, 2.4 eq) and ethanol (1 mL) were placed in a 10 mL Schott® sealed tube equipped with a magnetic stirrer. The reaction vessel was heated at the appropriate temperature with a heat-on. After the indicated time, the reaction mixture was cooled down in an ice bath, partitioned between EtOAc (5 mL) and 1N HCl (5 mL), decanted and the organic layer was washed with brine (5 mL). The

combined aqueous layers were extracted with EtOAc ( $3 \times 10$  mL), then the combined organic layers were dried over  $\text{MgSO}_4$  (1.5 g) and concentrated under reduced pressure to give the desired phosphonic acid monoester.

### Comparison of kinetics

The selective hydrolysis kinetic of substrate **1b** was evaluated at  $100\text{ }^\circ\text{C}$  for a reaction time of 5, 10 and 15 minutes with a conventional heating in a sealed tube and 1, 5 and 10 minutes with MW irradiation (Figure 2). On the other hand, the selective hydrolysis kinetic of substrate **1a** was evaluated at  $150\text{ }^\circ\text{C}$  for a reaction time of 15 and 30 minutes with a conventional heating in a sealed tube and with MW irradiation (Figure 3). The data were modeled according to a 2<sup>nd</sup> order kinetic as suitable for a basic hydrolysis reaction without large excess of reagent. The reaction rate was manually optimized to fit as best as possible the experimental data hence the

relative rate  $\frac{v_{MW}}{v_{thermal}}$  was evaluated.

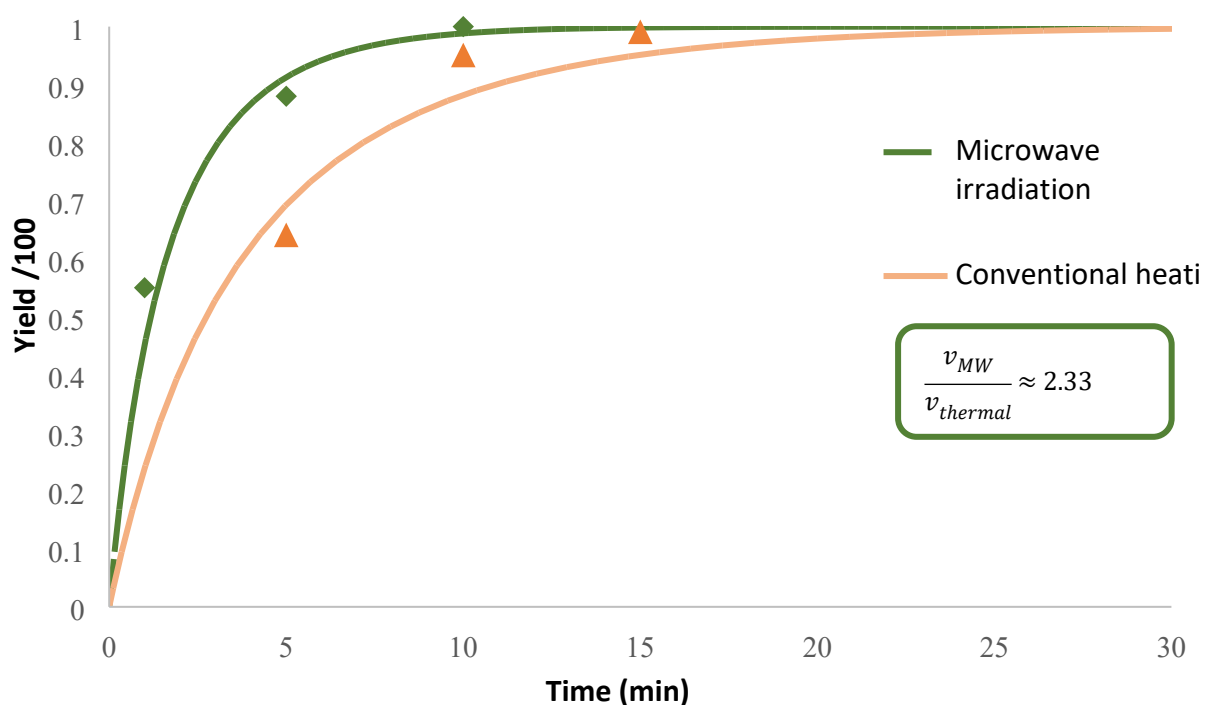

**Figure 2:** Kinetic monitoring by  $^{31}\text{P}$  NMR for the formation of **2b**.

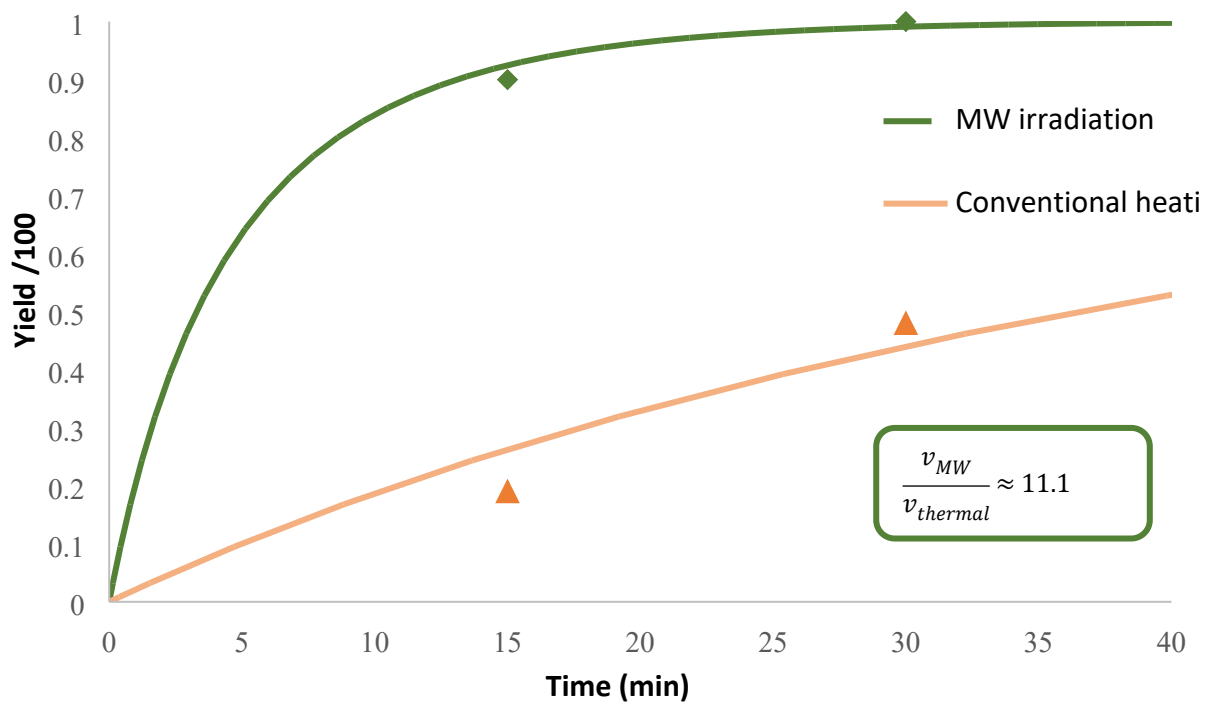

**Figure 3:** Kinetic monitoring by  $^{31}\text{P}$  NMR for the formation of **2a**.

## 5. NMR data

### Cyclohexylbenzylphosphonic acid monoethyl ester (2a)

NMR fid.1136.fid  
RE47  
1H MeOD /opt/topspin2.1 am2n1 5

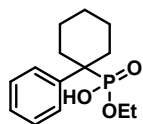

2a  
<sup>1</sup>H NMR  
MeOD  
400 MHz

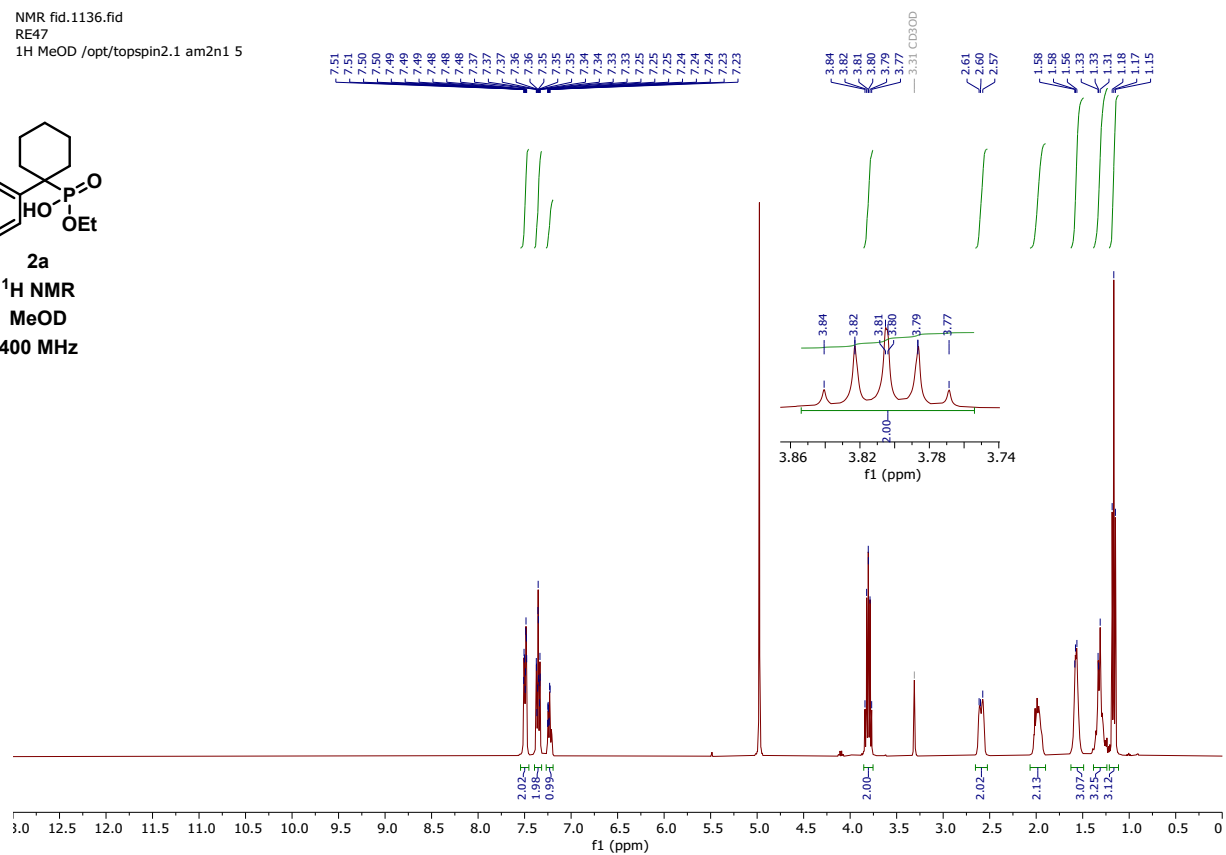

NMR fid.1137.fid  
RE47  
13C(1H) MeOD /opt/topspin2.1 am2n1 5

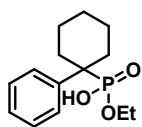

**2a**  
**<sup>13</sup>C NMR**  
**MeOD**  
**101 MHz**

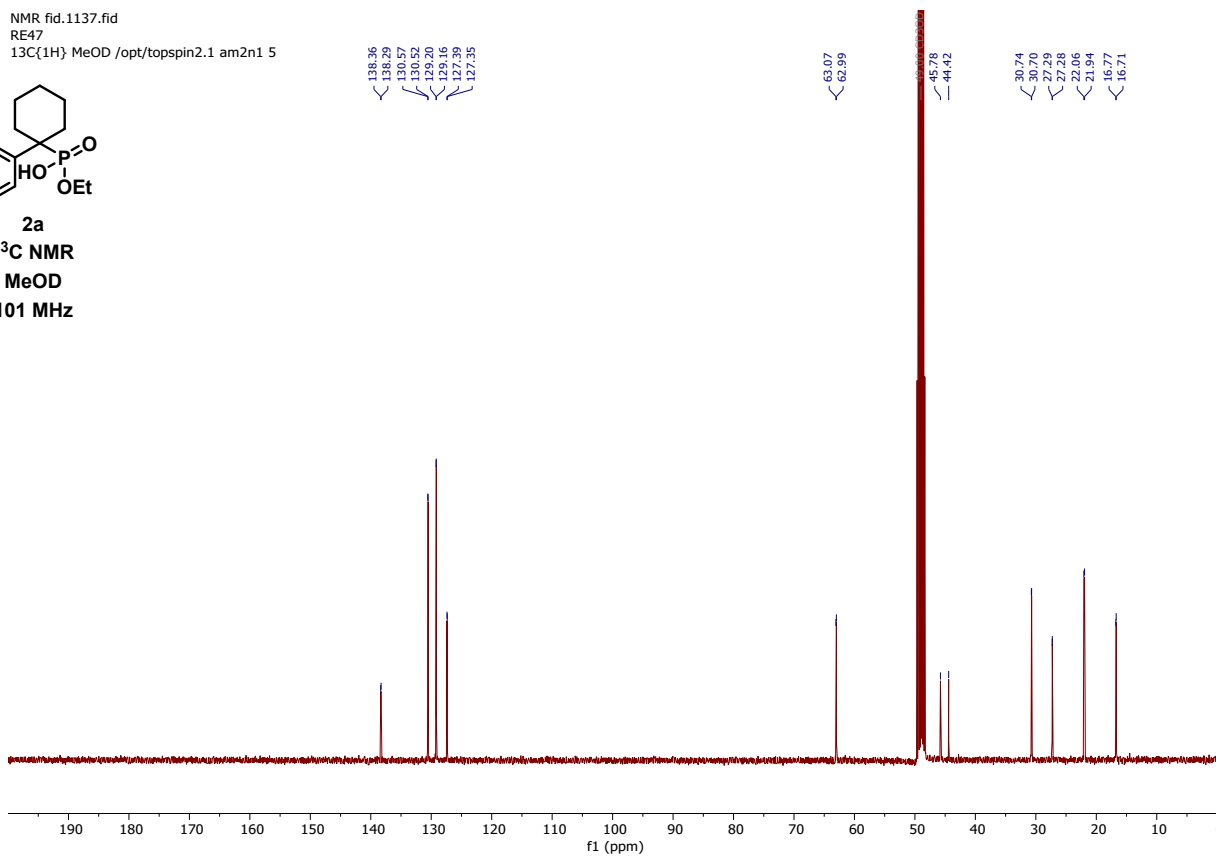

NMR fid.1138.fid  
RE47  
31P(1H) MeOD /opt/topspin2.1 am2n1 5

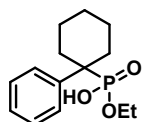

**2a**  
**<sup>31</sup>P NMR**  
**MeOD**  
**162 MHz**

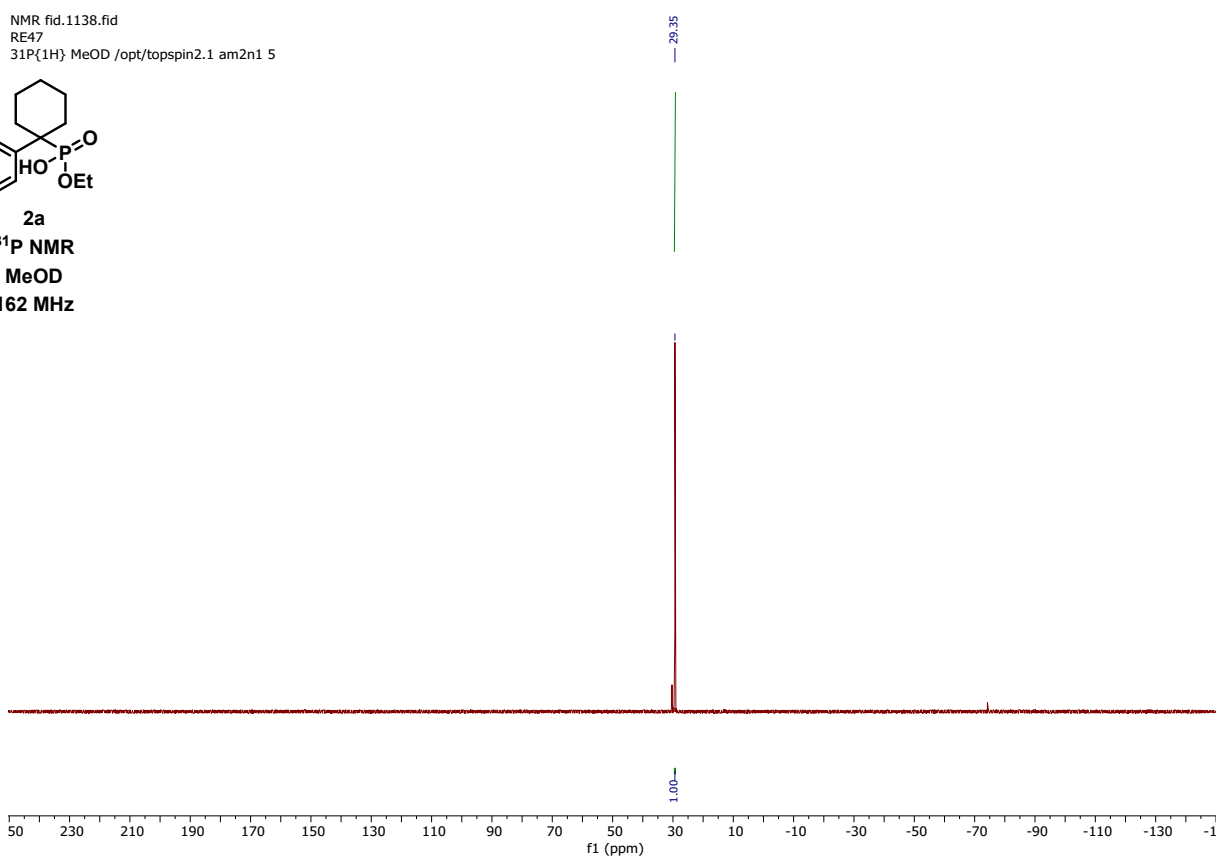

## Benzylphosphonic acid monoethyl ester (2b)

NMR fid.1113.fid  
RE28 crude 1  
1H CDCl3 /opt/topspin3.5pl7 am2n1 19

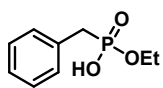

**2b**  
**<sup>1</sup>H NMR**  
**CDCl<sub>3</sub>**  
**400 MHz**

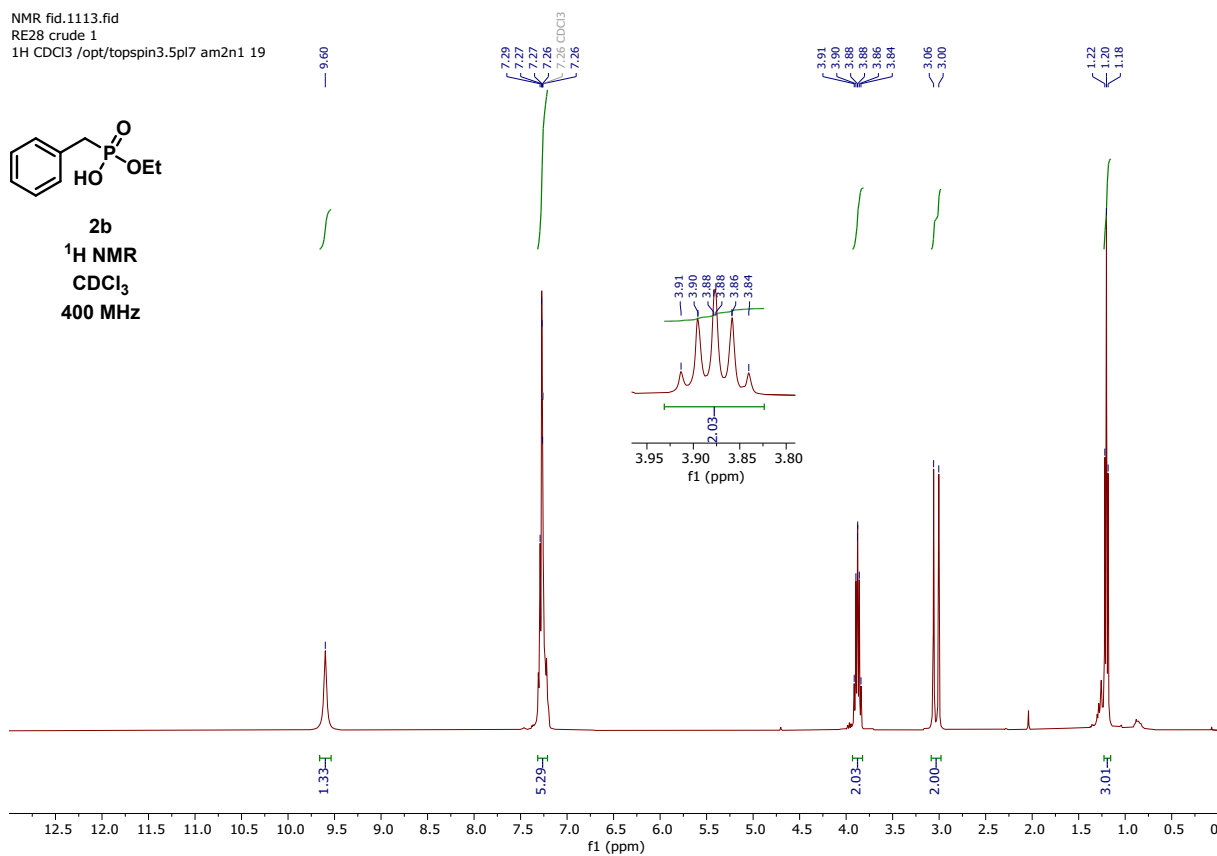

NMR fid.1114.fid  
RE28 crude 1  
31P(1H) CDCl3 /opt/topspin3.5pl7 am2n1 19

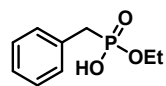

**2b**  
**<sup>31</sup>P NMR**  
**CDCl<sub>3</sub>**  
**162 MHz**

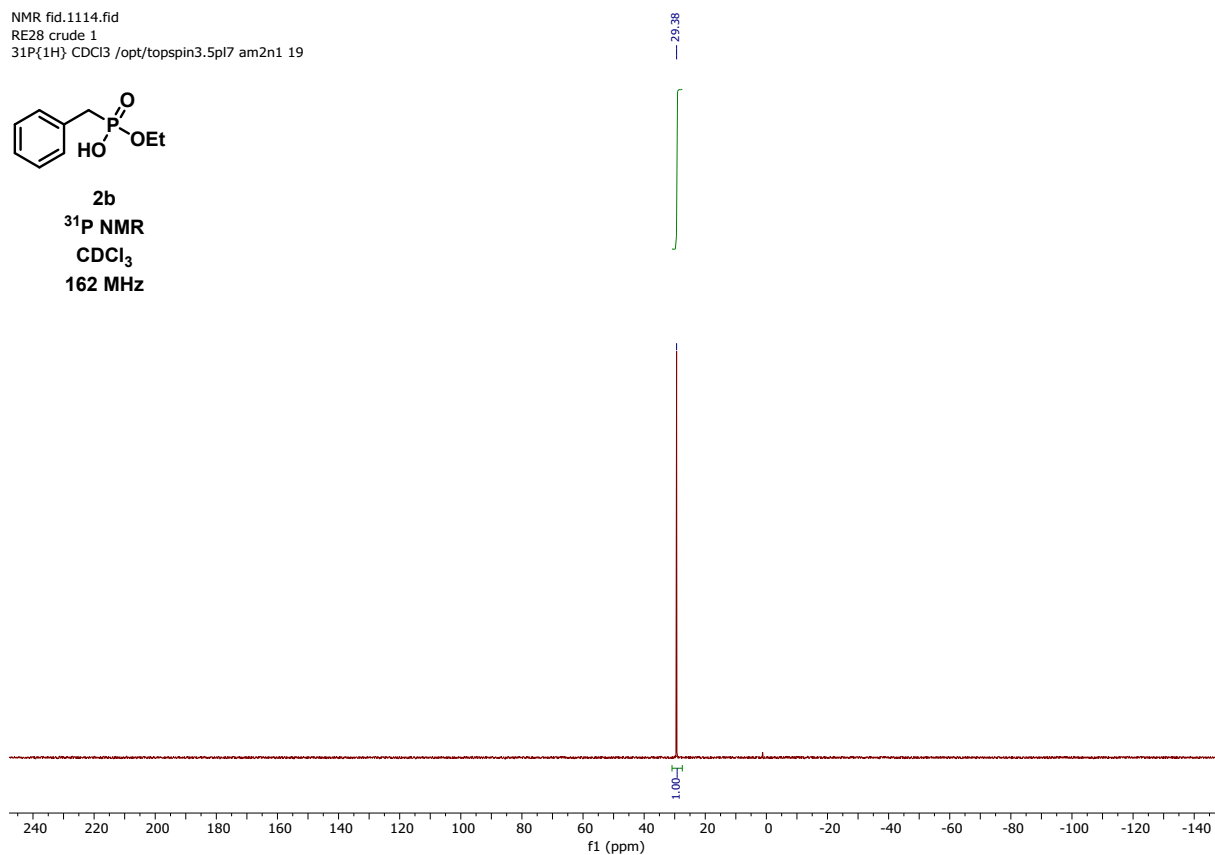

### Benzylphosphonic acid monomethyl ester (2c)

NMR fid.1144.fid  
RE130 publi  
1H CDCl3 /opt/topspin2.1 dept1a 18

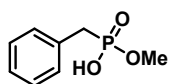

**2c**  
**<sup>1</sup>H NMR**  
**CDCl<sub>3</sub>**  
**400 MHz**

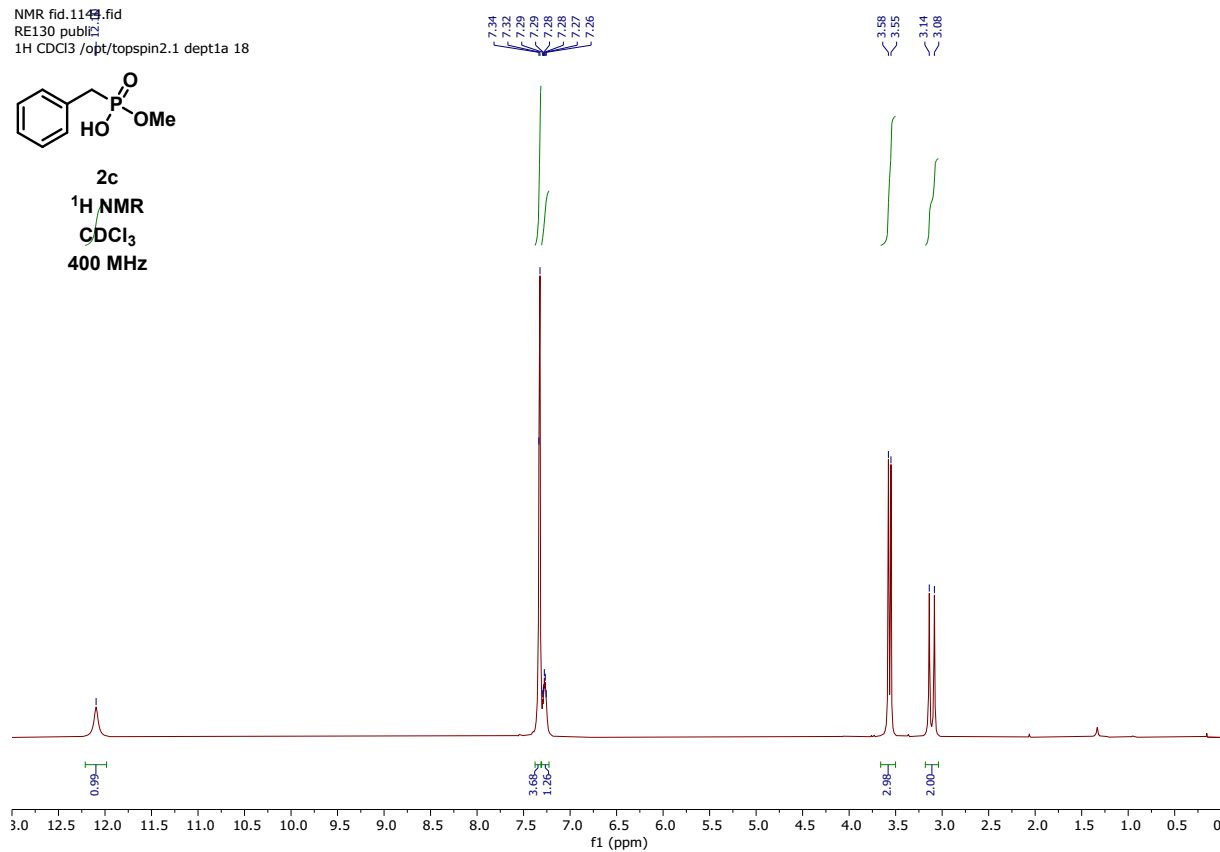

NMR fid.1146.fid  
RE130 publi  
13C(1H) CDCl3 /opt/topspin2.1 dept1a 18

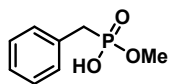

**2c**  
**<sup>13</sup>C NMR**  
**CDCl<sub>3</sub>**  
**101 MHz**

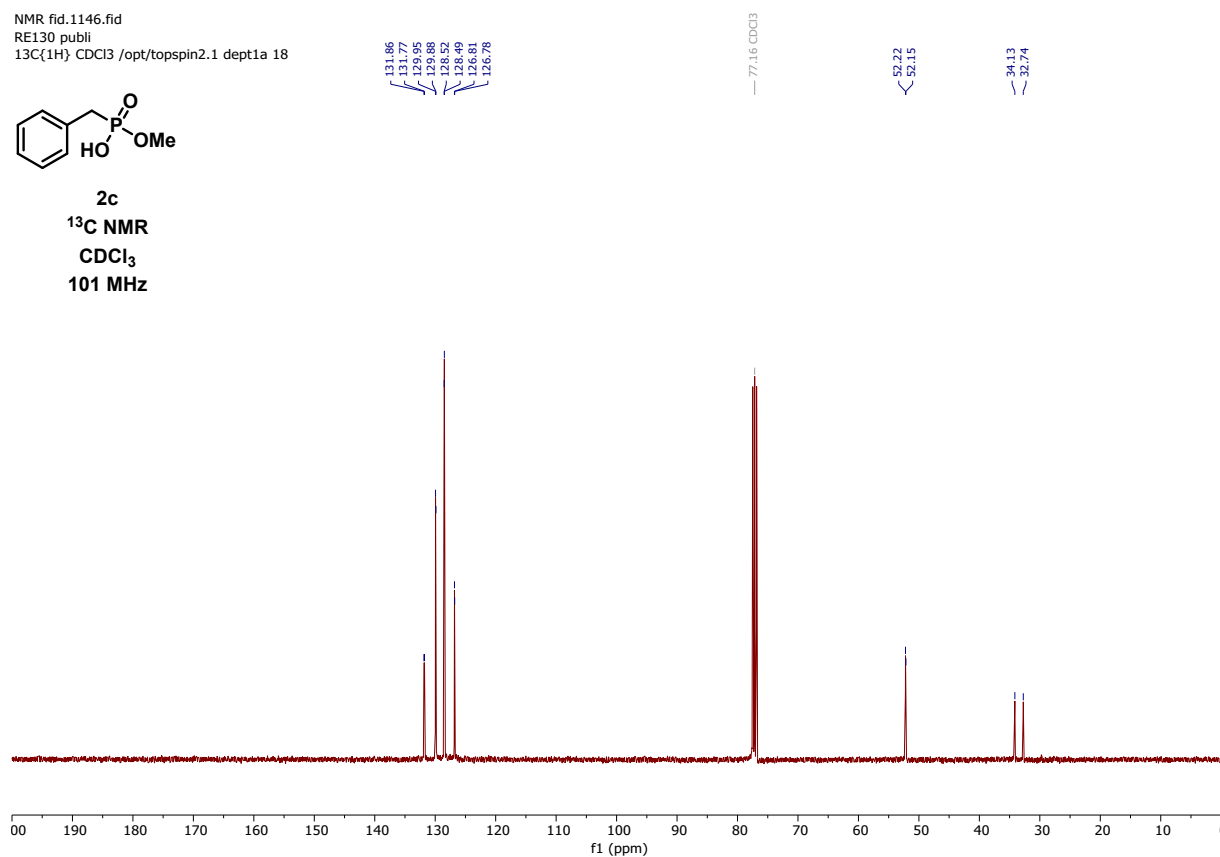

NMR fid.1145.fid  
RE130 publi  
31P{1H} CDCl3 /opt/topspin2.1 dept1a 18

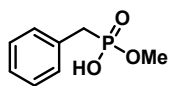

**2c**  
**<sup>31</sup>P NMR**  
**CDCl<sub>3</sub>**  
**162 MHz**

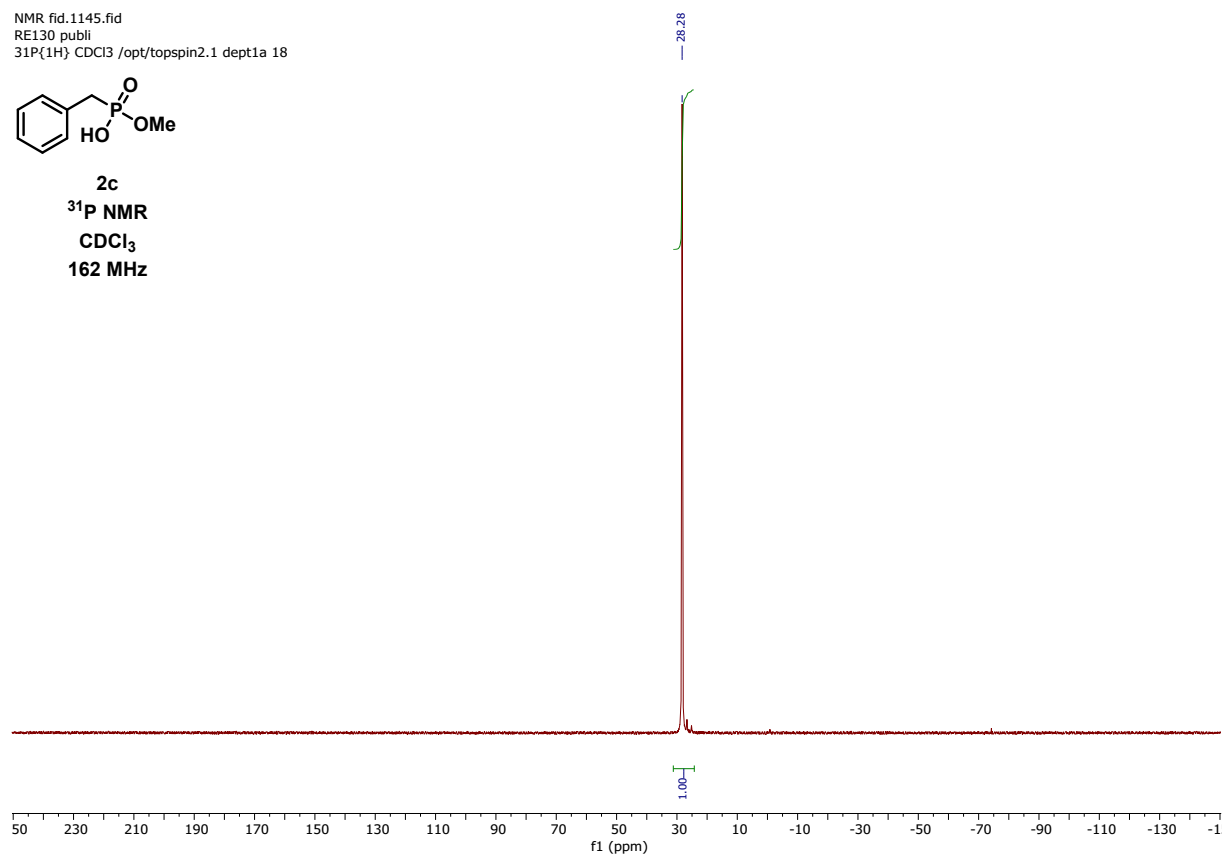



# Benzylphosphonic acid monoisopropyl ester (2d)

NMR fid.1141.fid  
RE112 publi  
1H CDCl3 /opt/topspin2.1 dept1a 17

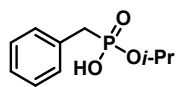

2d  
1H NMR  
CDCl<sub>3</sub>  
400 MHz

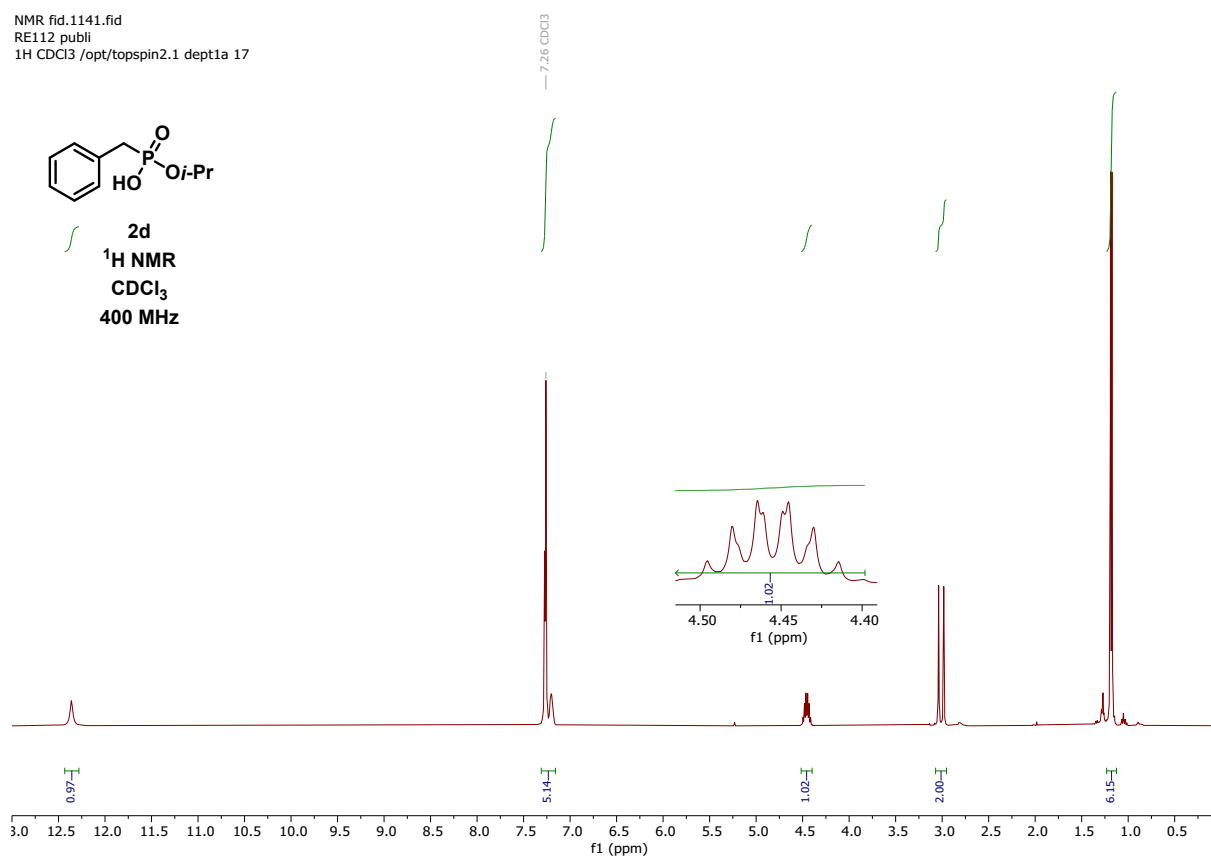

NMR fid.1143.fid  
RE112 publi  
13C(1H) CDCl3 /opt/topspin2.1 dept1a 17

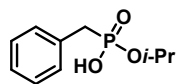

2d  
13C NMR  
CDCl<sub>3</sub>  
101 MHz

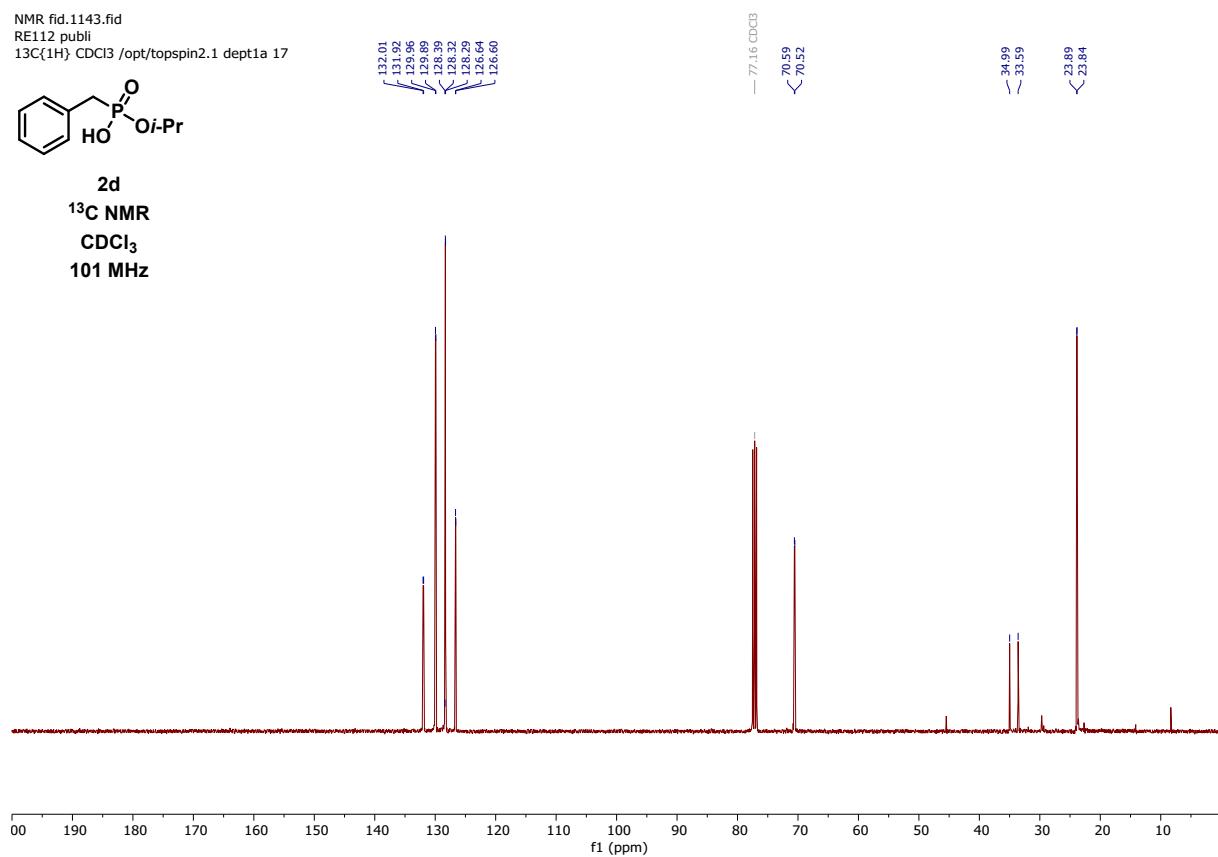

NMR fid.1142.fid  
RE112 publi  
31P(1H) CDCl3 /opt/topspin2.1 dept1a 17

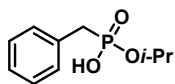

**2d**  
**<sup>31</sup>P NMR**  
**CDCl<sub>3</sub>**  
**162 MHz**

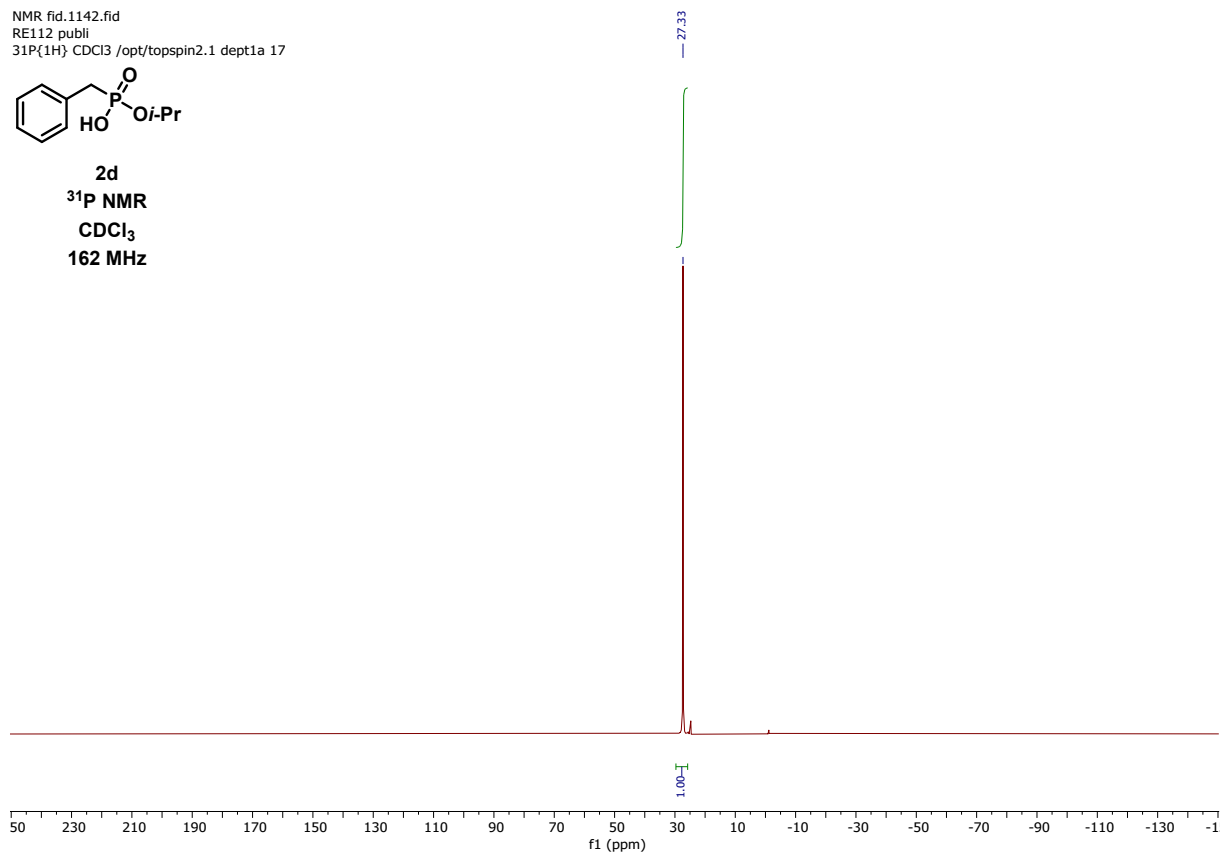

### Benzylphosphonic acid n-monobutyl ester (2e)

NMR fid.1104.fid  
RE133 publi  
1H CDCl3 /opt/topspin2.1 dept1a 26

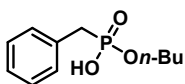

**2e**  
**<sup>1</sup>H NMR**  
**CDCl<sub>3</sub>**  
**400 MHz**

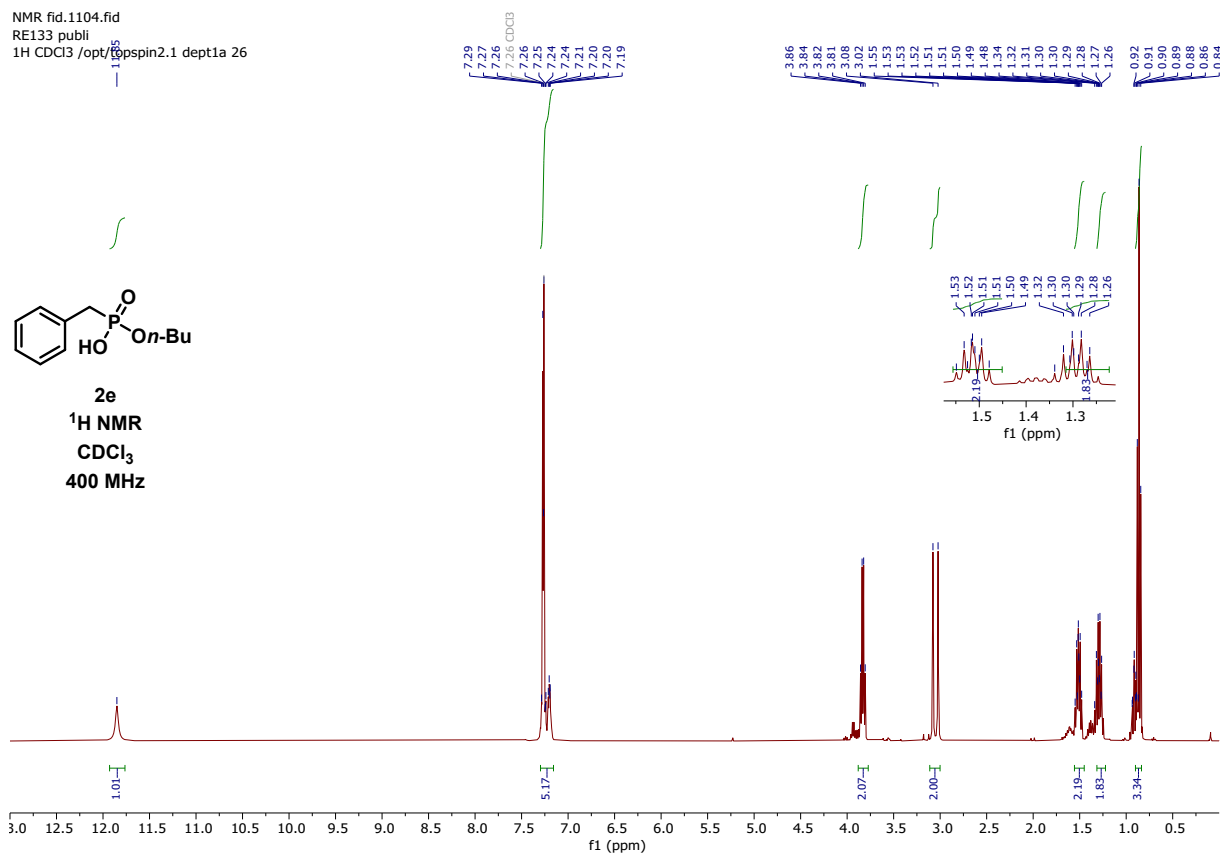

NMR fid.1106.fid  
RE133 publi  
13C{1H} CDCl3 /opt/topspin2.1 dept1a 26

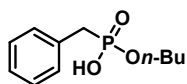

**2e**  
**<sup>13</sup>C NMR**  
**CDCl<sub>3</sub>**  
**101 MHz**

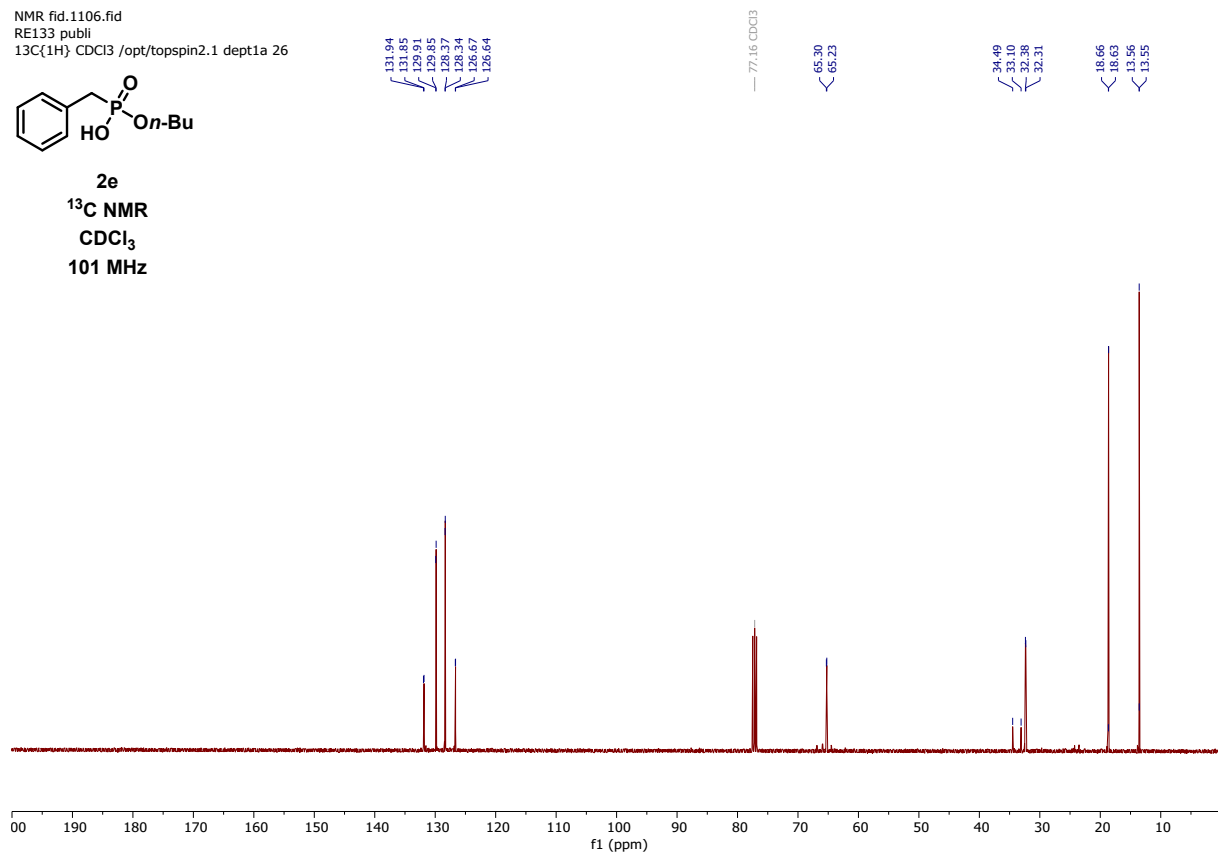

NMR fid.1105.fid  
RE133 publi  
31P{1H} CDCl3 /opt/topspin2.1 dept1a 26

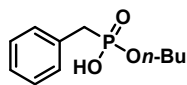

**2e**  
**<sup>31</sup>P NMR**  
**CDCl<sub>3</sub>**  
**162 MHz**

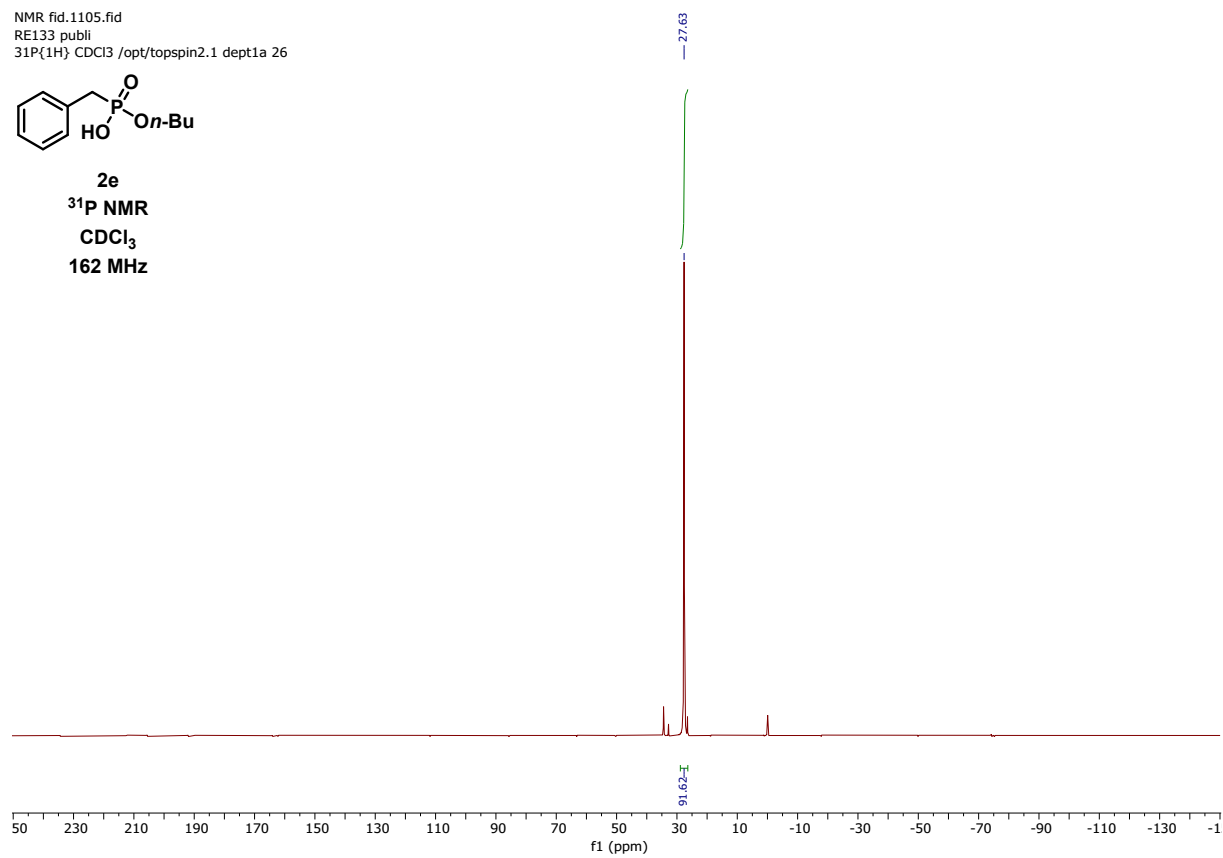

## 2-Bromobenzylphosphonic acid monoethyl ester (2f)

NMR fid.1113.fid  
 REI38 publi  
 1H CDCl<sub>3</sub> /opt/topspin2.1 dept1a 29

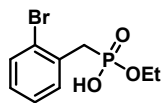

**2f**  
<sup>1</sup>H NMR  
 CDCl<sub>3</sub>  
 400 MHz

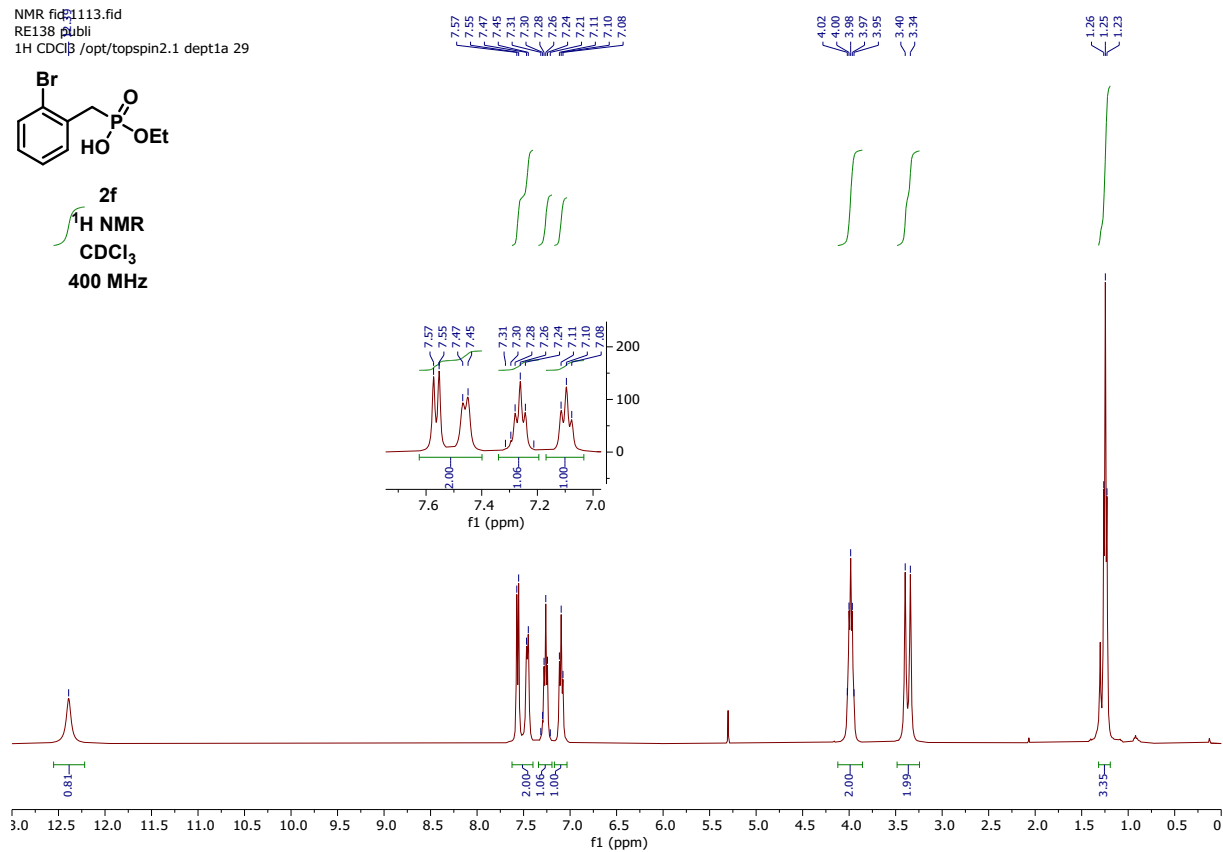

NMR fid.1115.fid  
 REI38 publi  
 13C(1H) CDCl<sub>3</sub> /opt/topspin2.1 dept1a 29

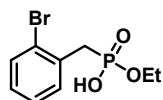

**2f**  
<sup>13</sup>C NMR  
 CDCl<sub>3</sub>  
 101 MHz

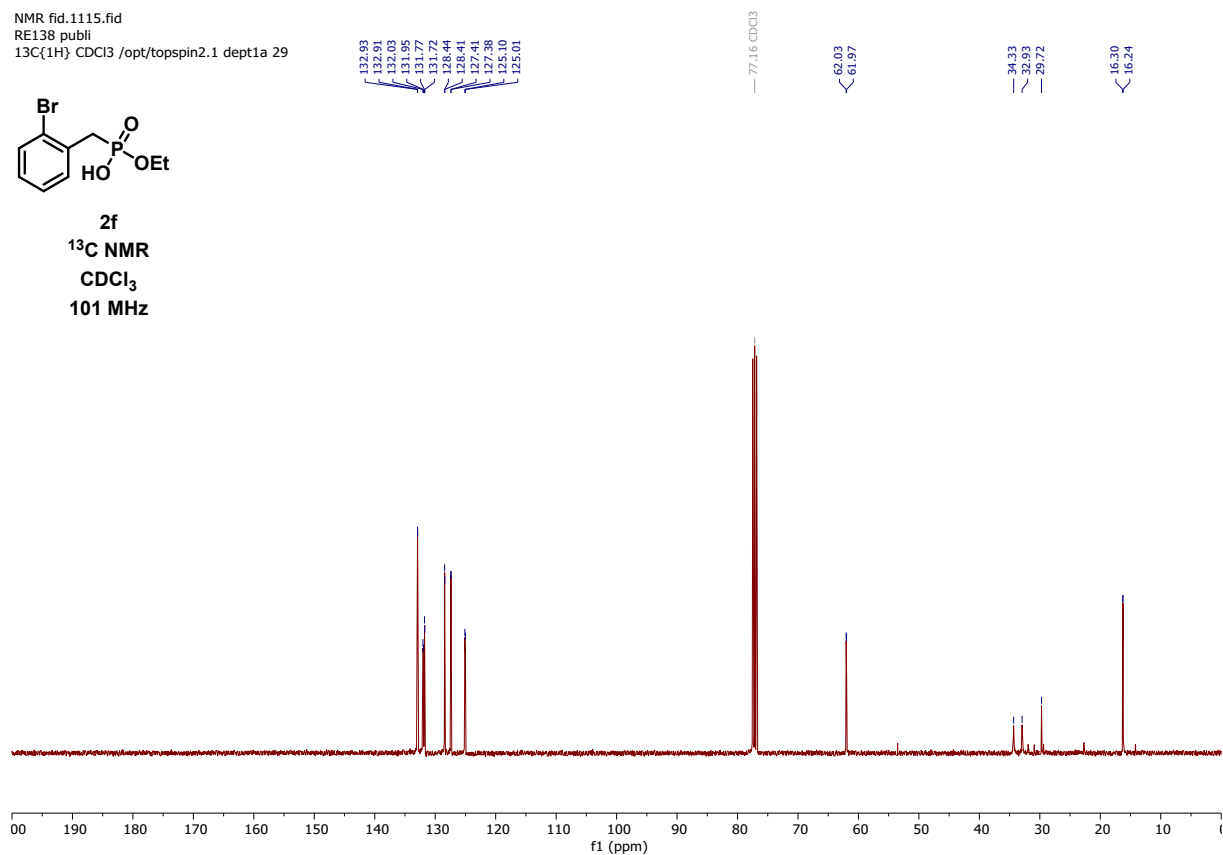

NMR fid.1114.fid  
RE138 publi  
31P{1H} CDCl3 /opt/topspin2.1 dept1a 29

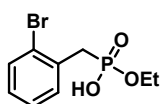

**2f**  
**<sup>31</sup>P NMR**  
**CDCl<sub>3</sub>**  
**162 MHz**

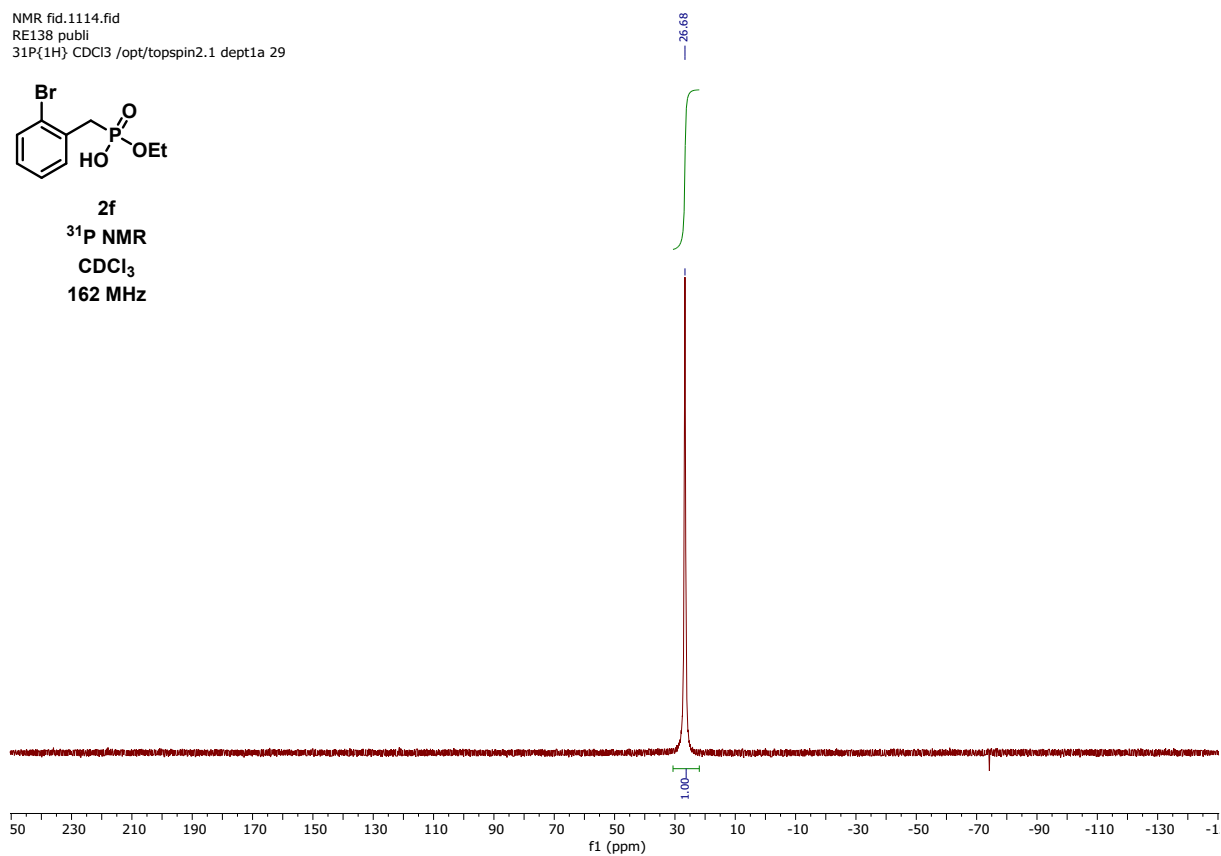

## 2-Chloro-5-trifluoromethylbenzylphosphonic acid monoethyl ester (2g)

NMR fid.1116.fid  
RE139 publi  
1H CDCl3 /opt/topspin2.1 dept1a 30

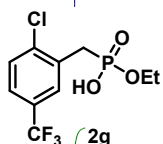

**2g**  
**<sup>1</sup>H NMR**  
**CDCl<sub>3</sub>**  
**400 MHz**

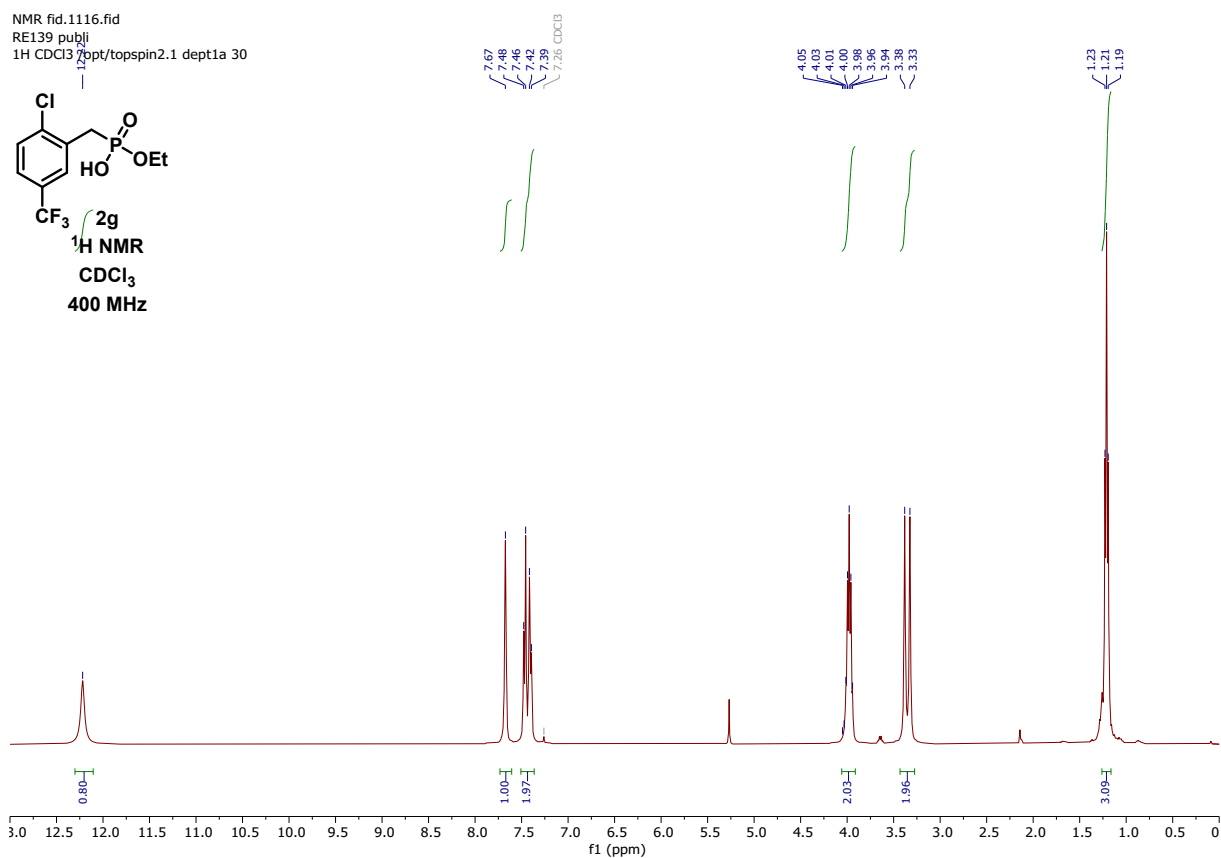

NMR fid.1118.fid  
REI39 publi  
13C{1H} CDCl3 /opt/topspin2.1 dept1a 30

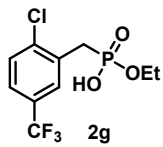

<sup>13</sup>C NMR  
CDCl<sub>3</sub>  
101 MHz

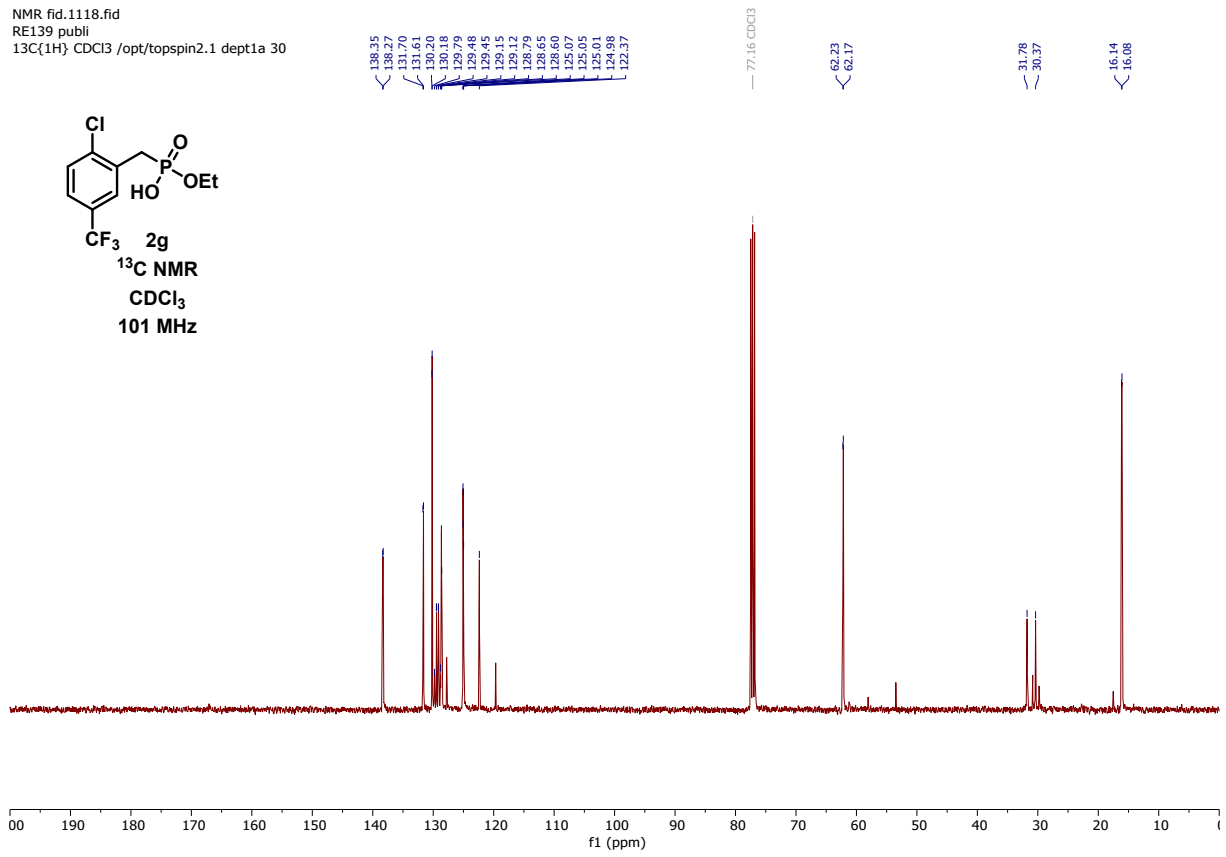

NMR fid.1117.fid  
REI39 publi  
31P{1H} CDCl3 /opt/topspin2.1 dept1a 30

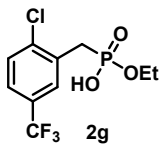

<sup>31</sup>P NMR  
CDCl<sub>3</sub>  
162 MHz

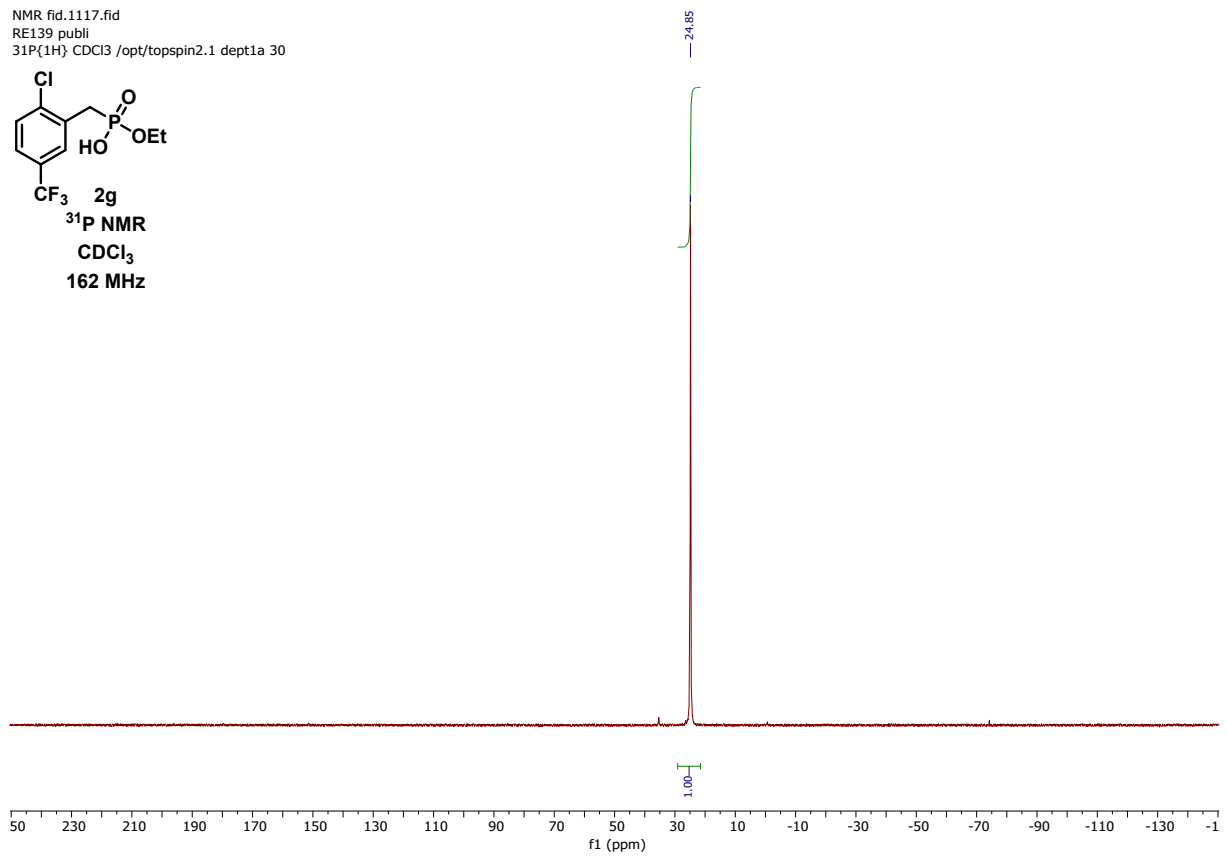

## 4-Carbamoylbenzylphosphonic acid monoethyl ester (2h)

REB280 C.20.fid  
1H MeOD {D:\icgd1} icgd1 48

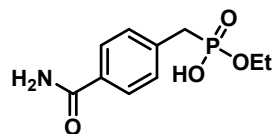

2h  
<sup>1</sup>H NMR  
MeOD  
400 MHz

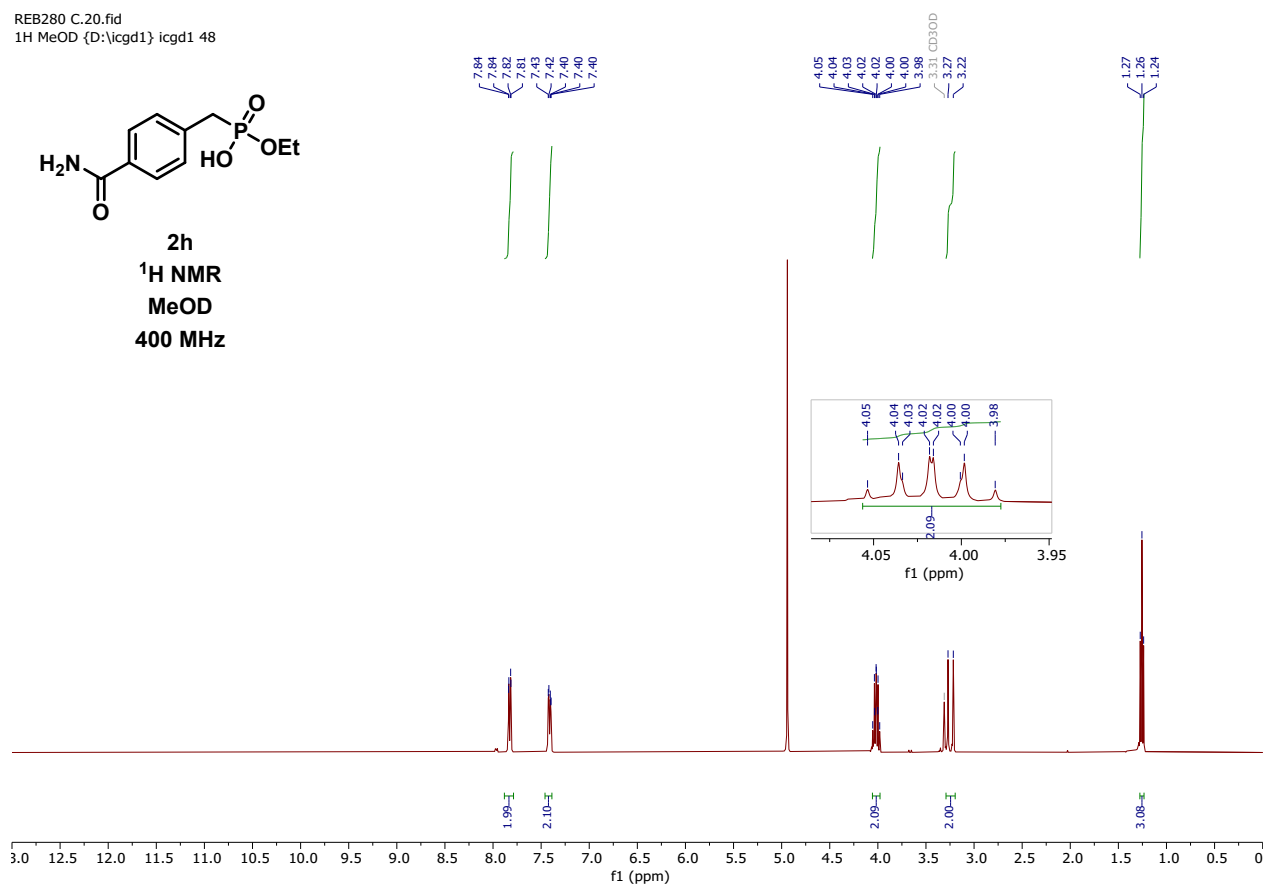

REB280 C.22.fid  
13C-Night MeOD {D:\icgd1} icgd1 48

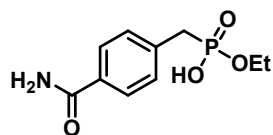

2h  
<sup>13</sup>C NMR  
MeOD  
101 MHz

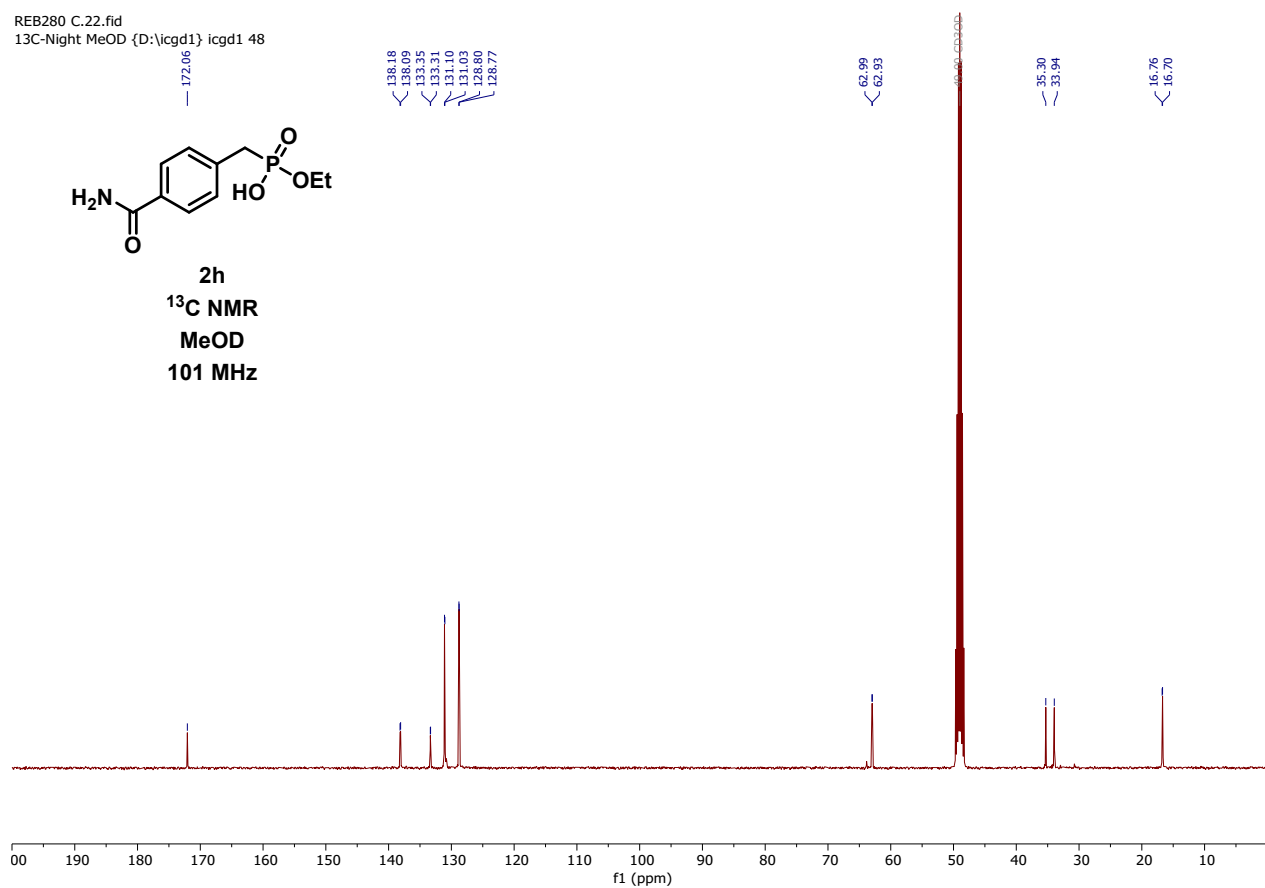

REB280 brut.11.fid  
31P-CPD MeOD {D:\icgd1} icgd1 13

24.92

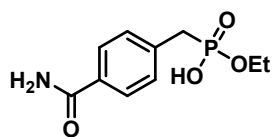

2h  
<sup>31</sup>P NMR  
MeOD  
162 MHz

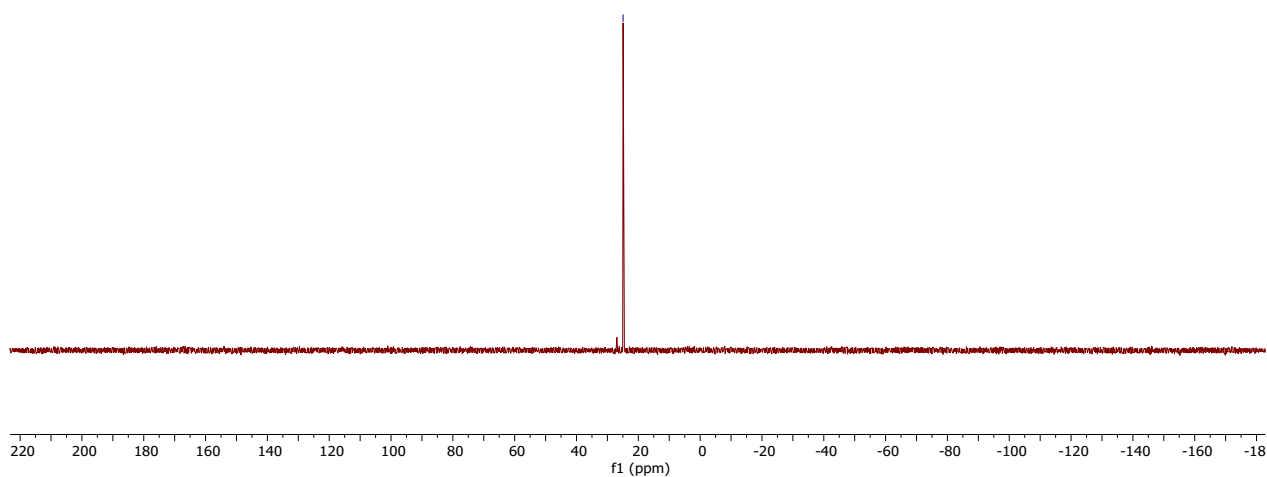

**Naphthalen-1-ylmethylphosphonic acid monoethyl ester (2i)**



RMN/LM202 dry 1H  
LM202 dry  
1H CDCl3 /opt/topspin2.1 dept1a 4

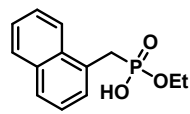

2i  
1H NMR  
CDCl3  
400 MHz

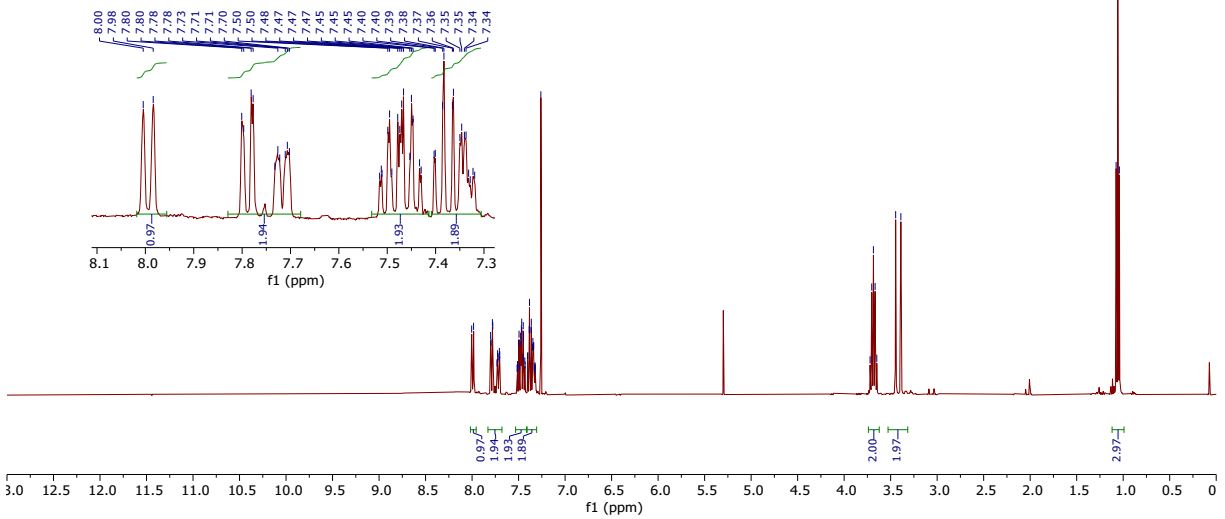

RMN/LM202 dry 13C  
LM202 dry  
13C(1H) CDCl3 /opt/topspin2.1 dept1a 4

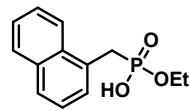

2i  
13C NMR  
CDCl3  
101 MHz

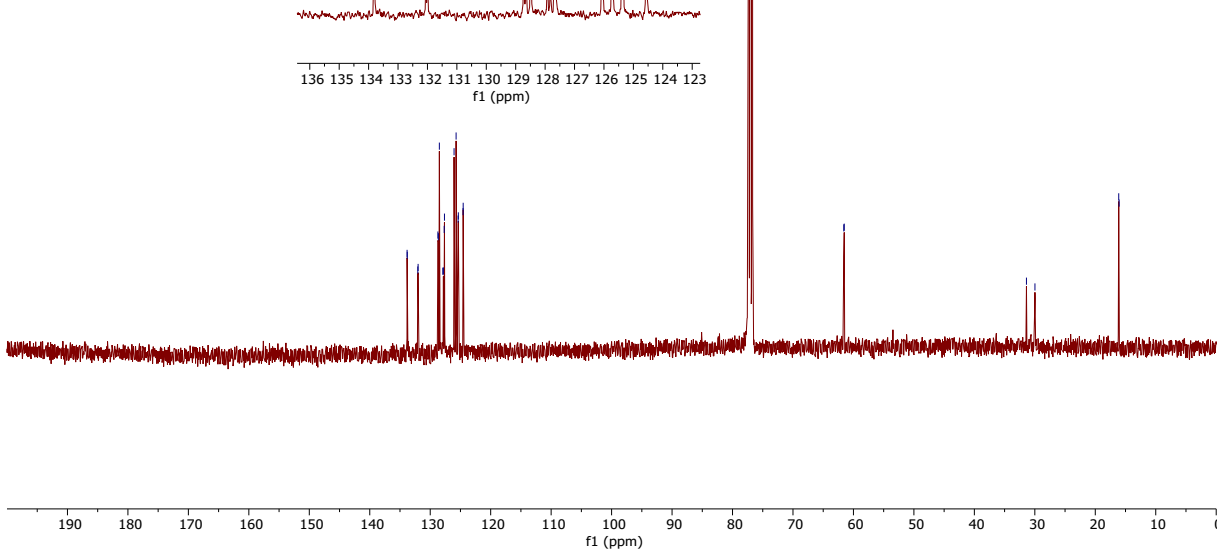

RMN/LM202 dry 31P  
LM202 dry  
31P(1H) CDCl3 /opt/topspin2.1 dept1a 4

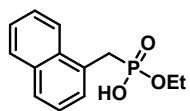

2i  
<sup>31</sup>P NMR  
CDCl<sub>3</sub>  
162 MHz

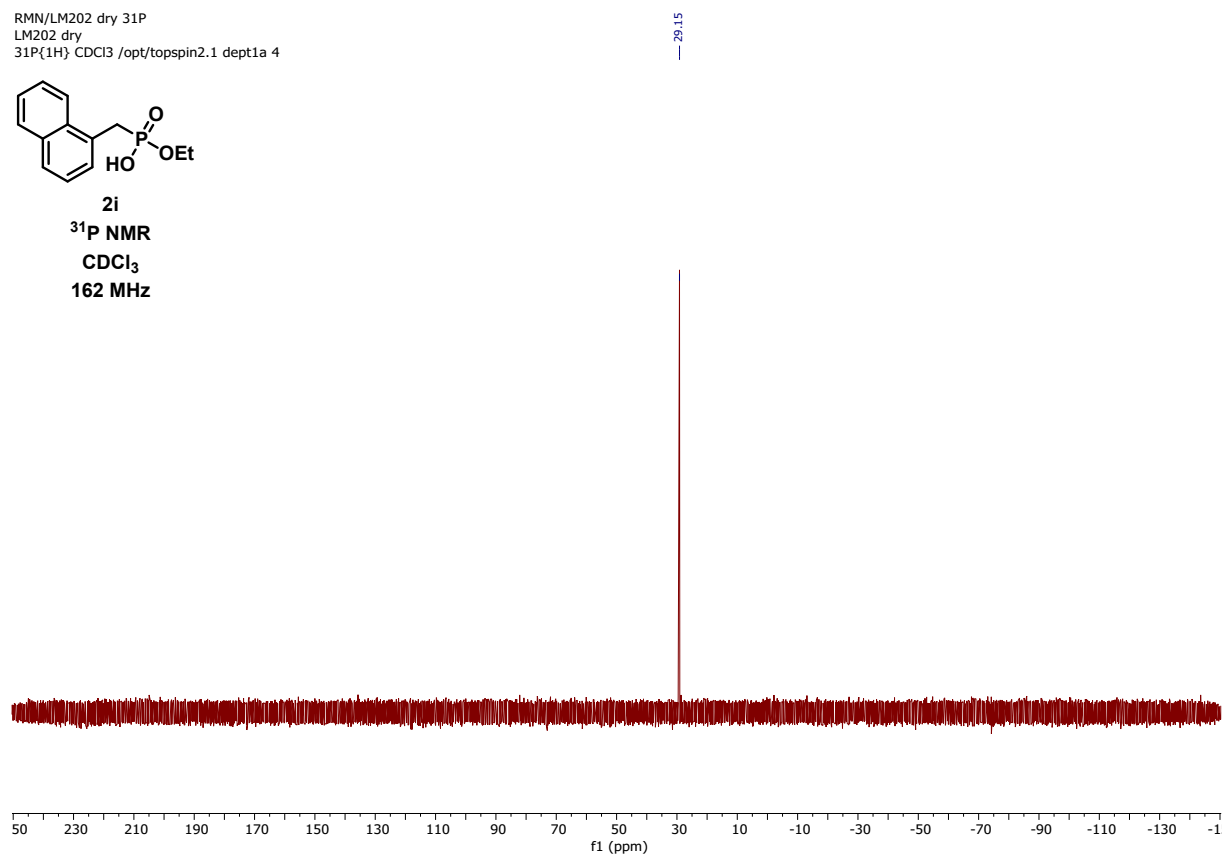

# 4'-((ethoxy(hydroxy)phosphoryl)methyl)-[1,1'-biphenyl]-3-carboxylic acid (2j)

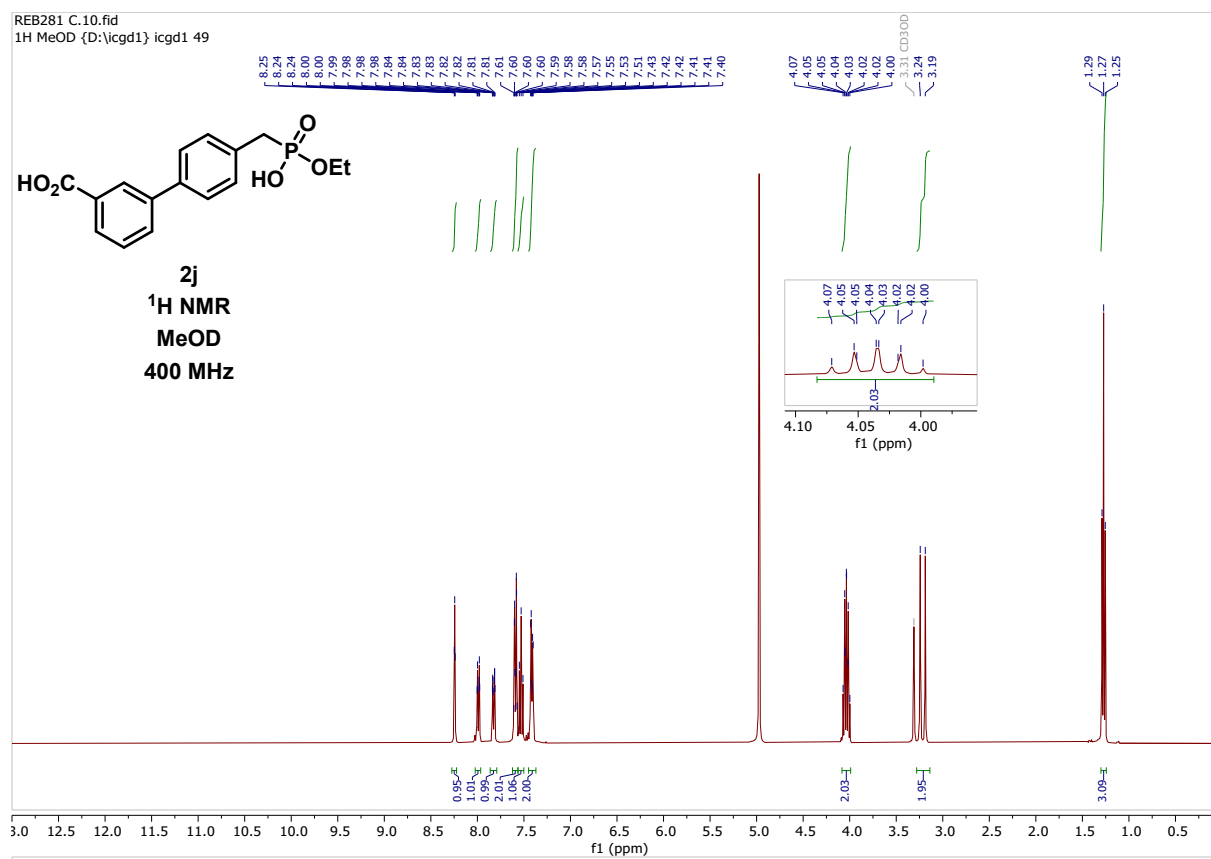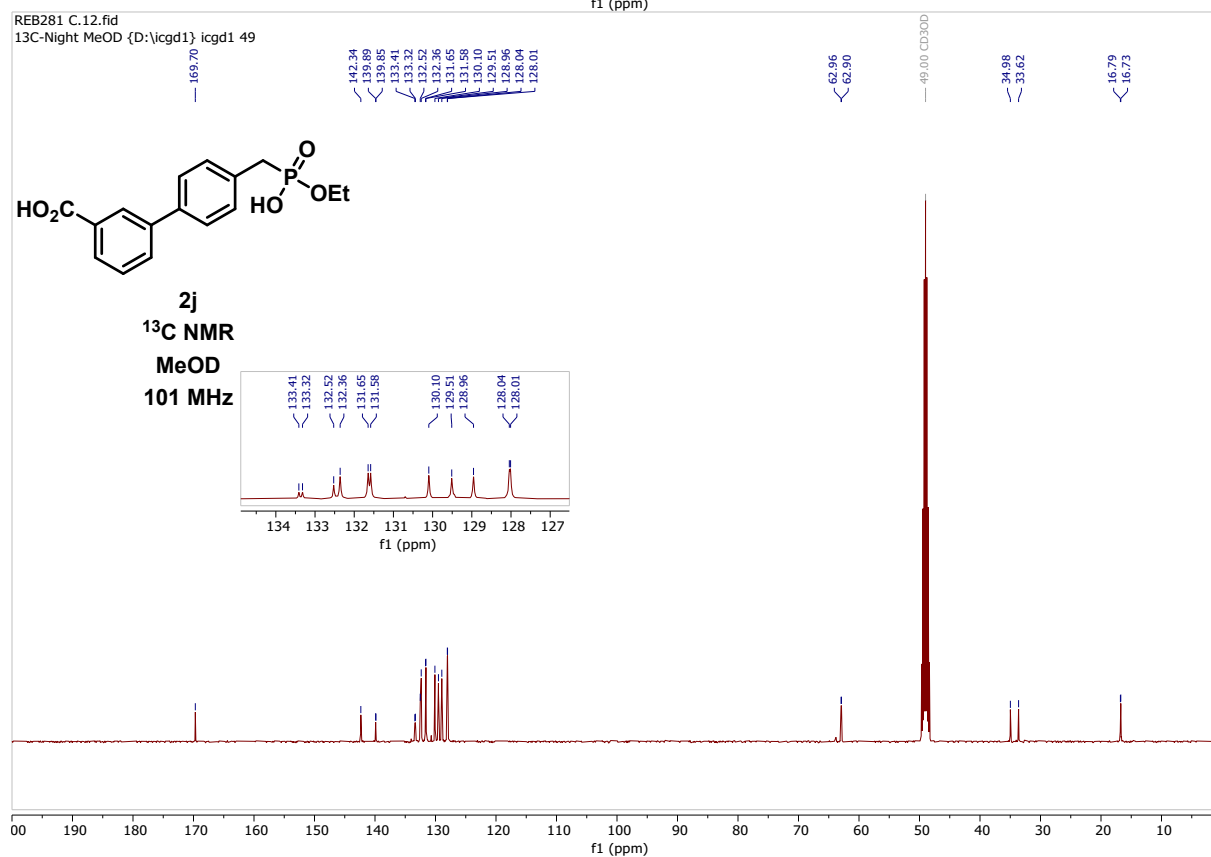

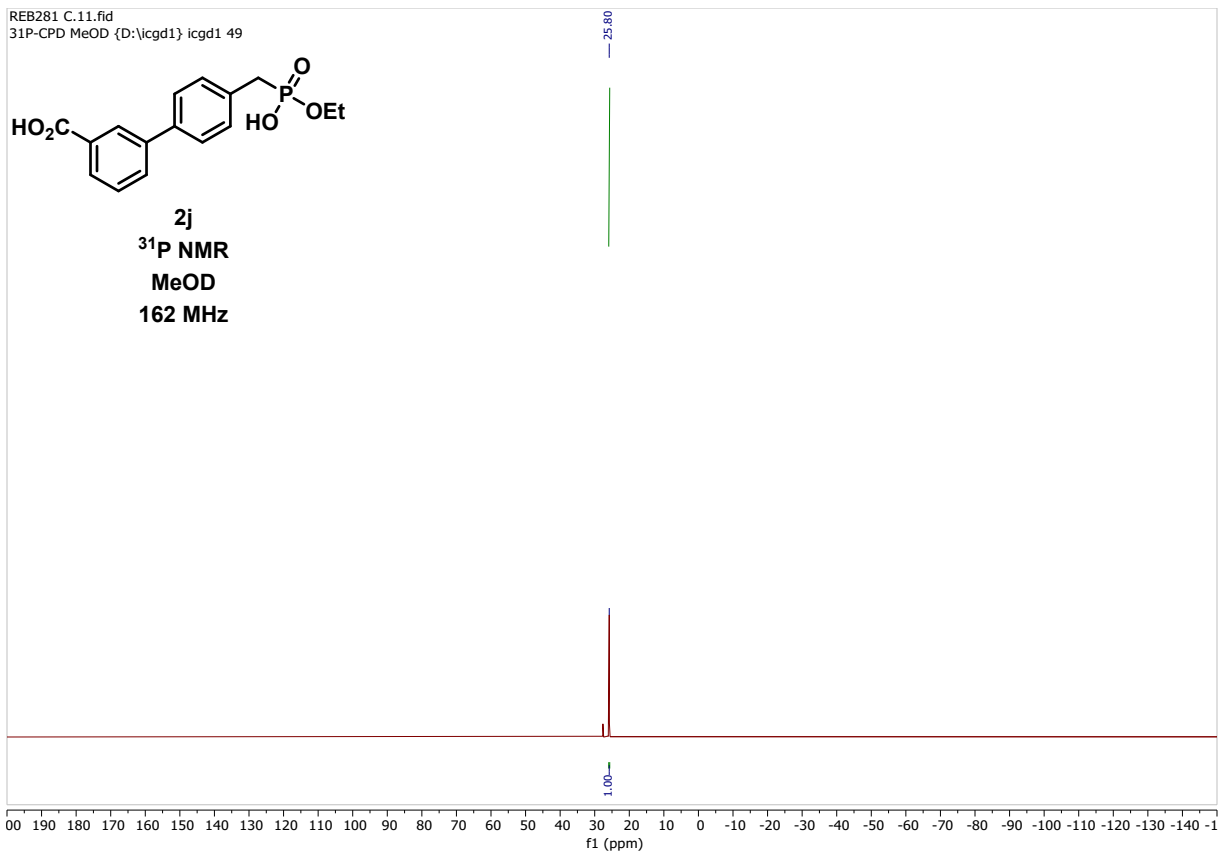

## Cyclopentylbenzylphosphonic acid monoethyl ester (2k)

NMR fid.11116.fid  
REI28  
1H MeOD /opt/topspin3.5pl7 dept1a 58

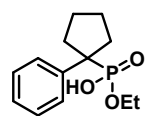

**2k**  
**<sup>1</sup>H NMR**  
**MeOD**  
**400 MHz**

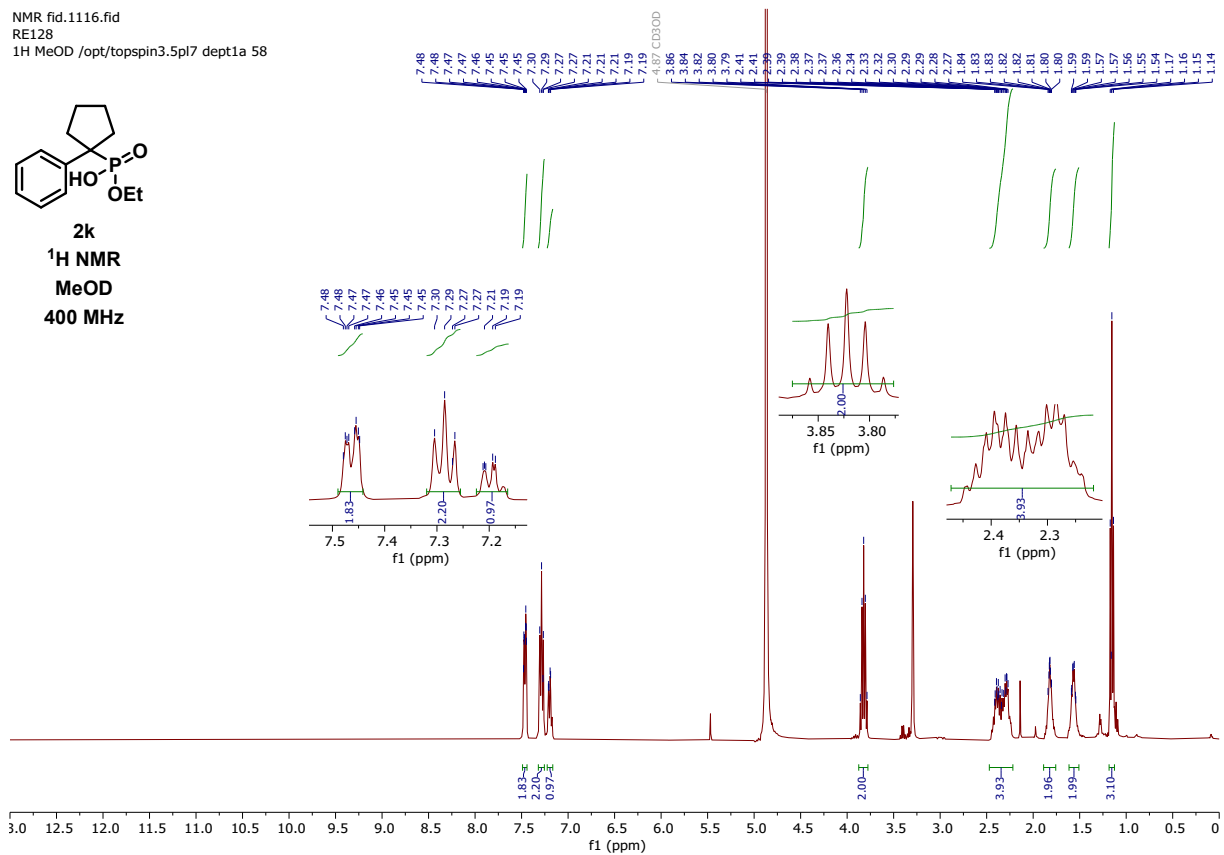

NMR fid.1118.fid  
REI28  
13C{1H} MeOD /opt/topspin3.5pl7 dept1a 58

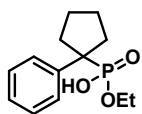

2k  
13C NMR  
MeOD  
101 MHz

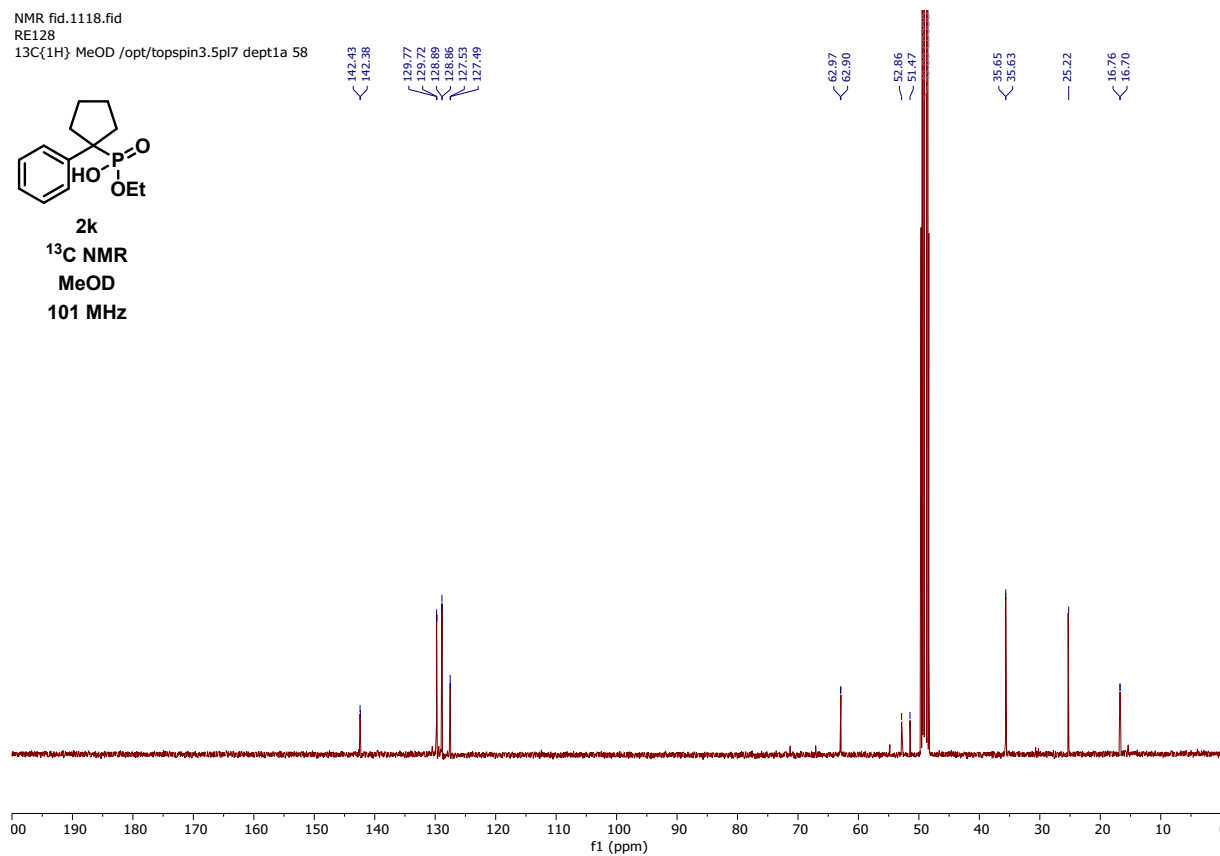

NMR fid.1117.fid  
REI28  
31P{1H} MeOD /opt/topspin3.5pl7 dept1a 58

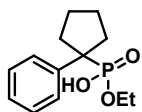

2k  
31P NMR  
MeOD  
162 MHz

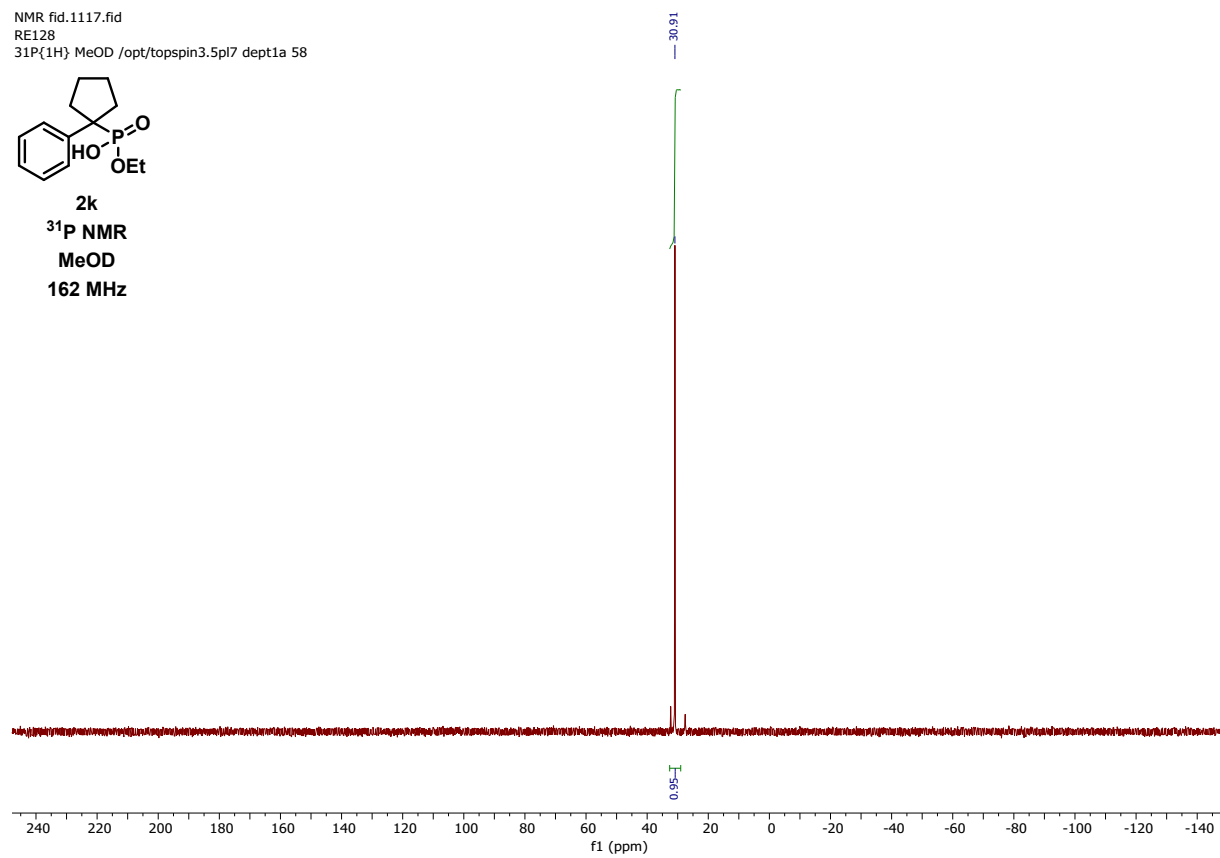

# Diallylbenzylphosphonic acid monoethyl ester (2l)

NMR fid.1107.fid  
RE136 publi

<sup>1</sup>H NMR CDCl<sub>3</sub> /opt/topspin2.1 dept1a 27

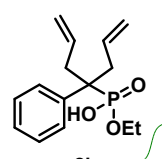

**2l**  
**<sup>1</sup>H NMR**  
**CDCl<sub>3</sub>**  
**400 MHz**

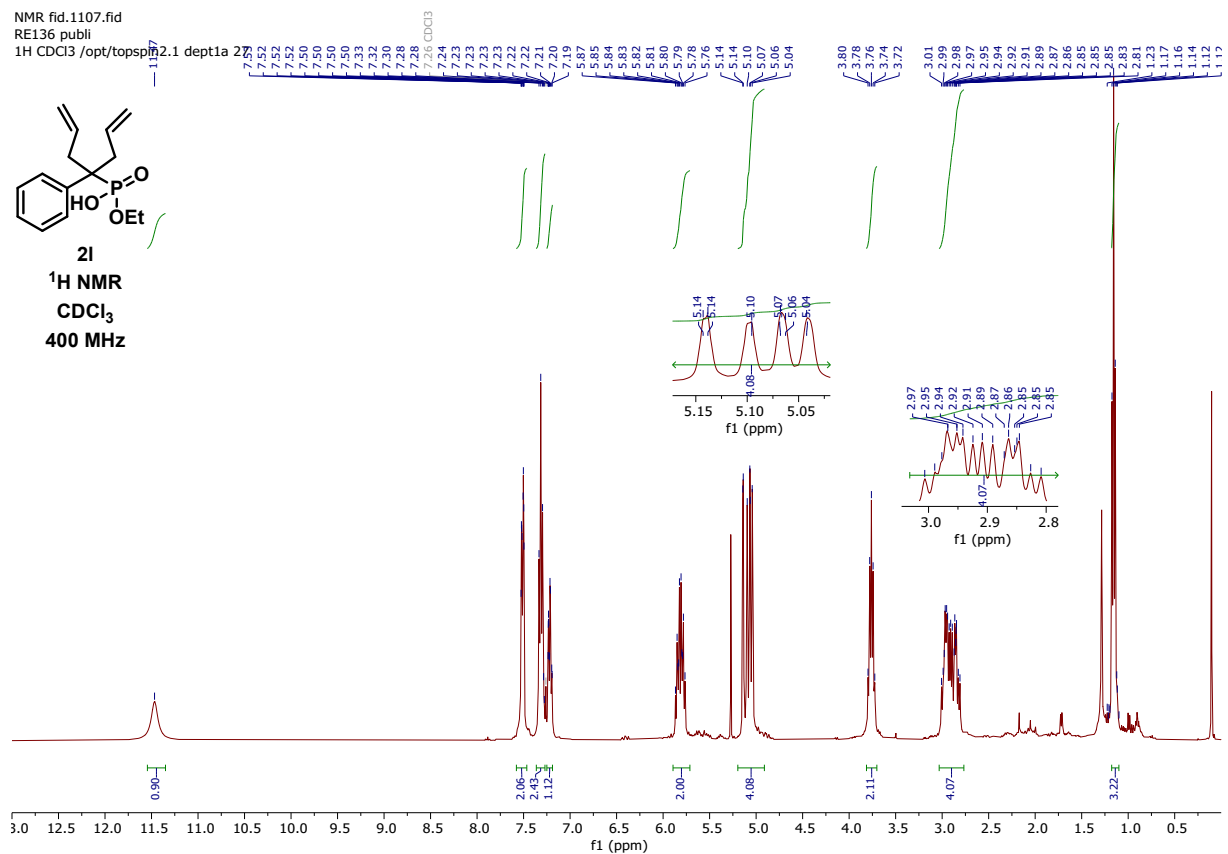

NMR fid.1109.fid  
RE136 publi

<sup>13</sup>C NMR CDCl<sub>3</sub> /opt/topspin2.1 dept1a 27

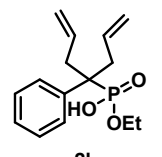

**2l**  
**<sup>13</sup>C NMR**  
**CDCl<sub>3</sub>**  
**101 MHz**

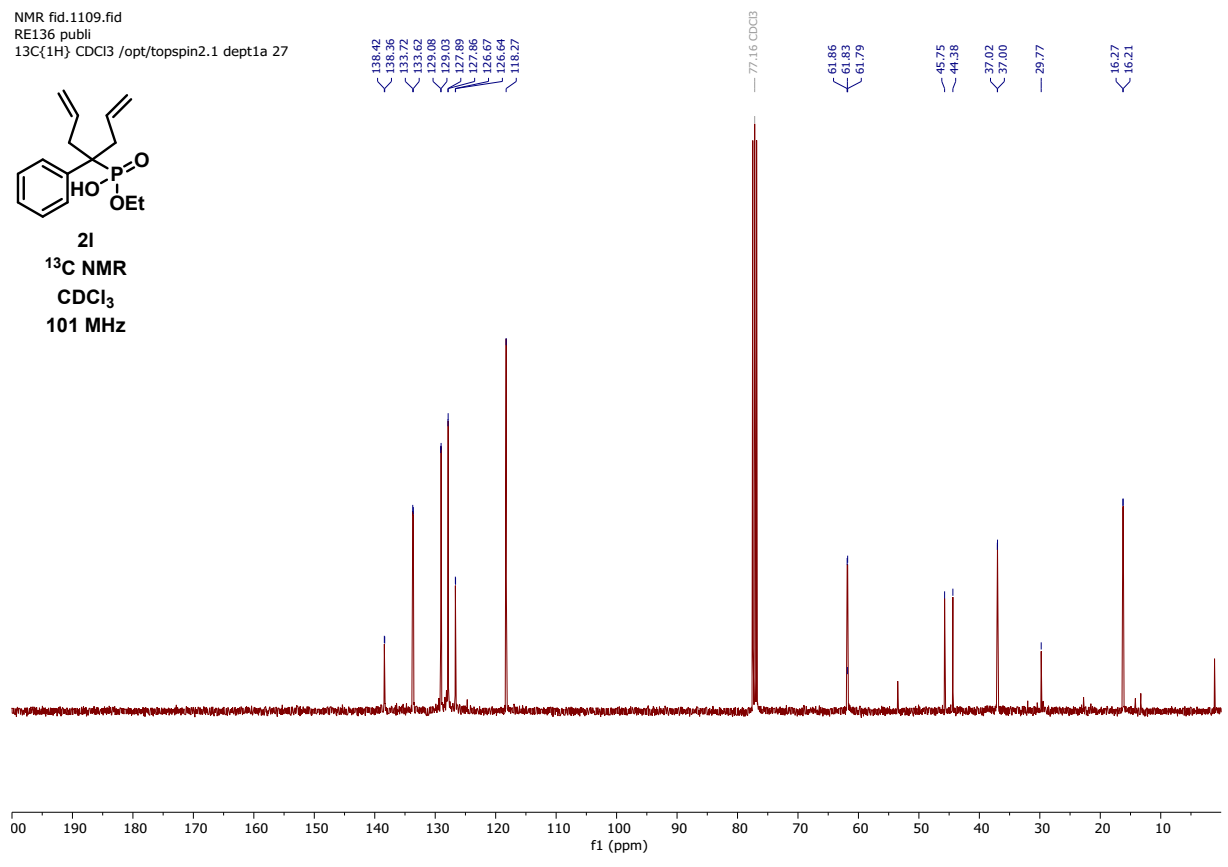

NMR fid.1108.fid  
RE136 publi  
31P{1H} CDCl3 /opt/topspin2.1 dept1a 27

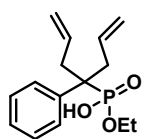

2l  
31P NMR  
CDCl<sub>3</sub>  
162 MHz

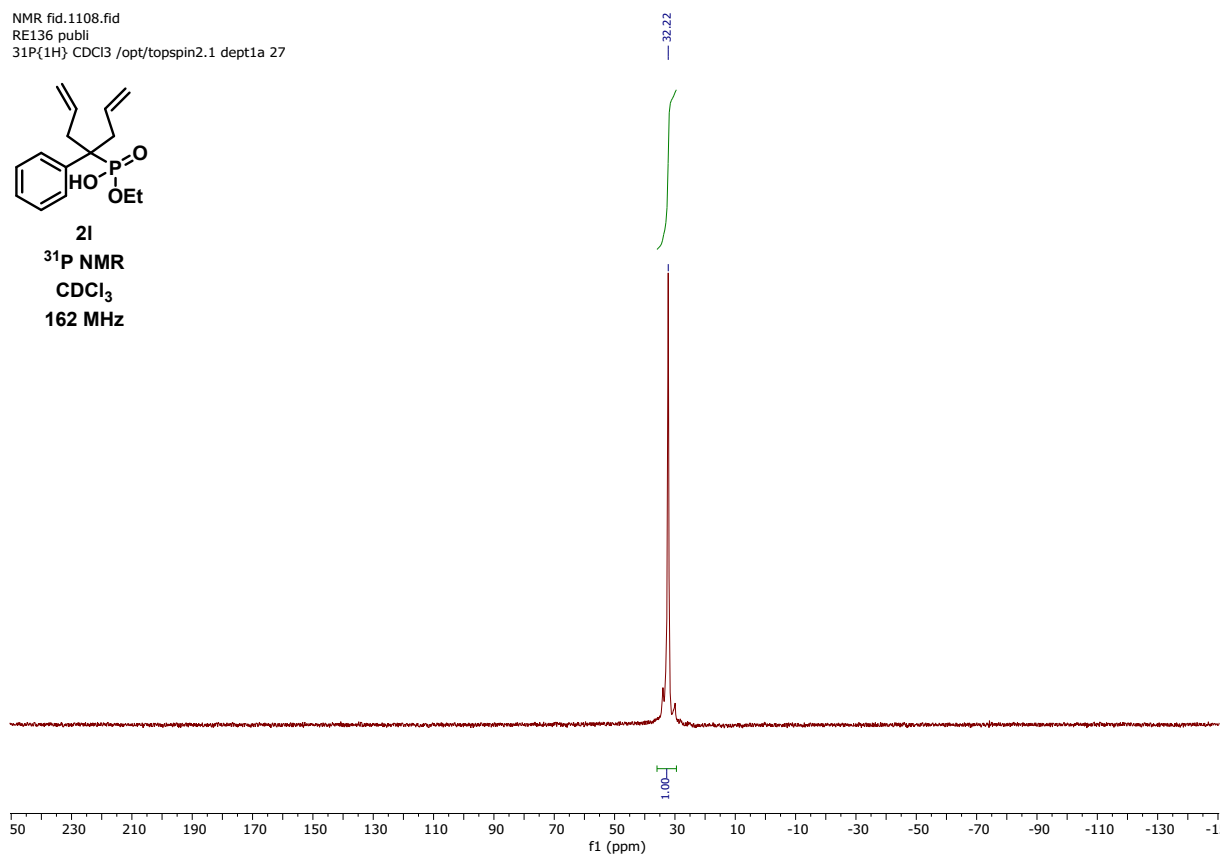

### Ethylphosphonic acid monoethyl ester (2m)

NMR fid.1135.fid  
RE98 publi  
1H CDCl3 /opt/topspin2.1 dept1a 15

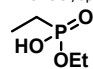

2m  
1H NMR  
CDCl<sub>3</sub>  
400 MHz

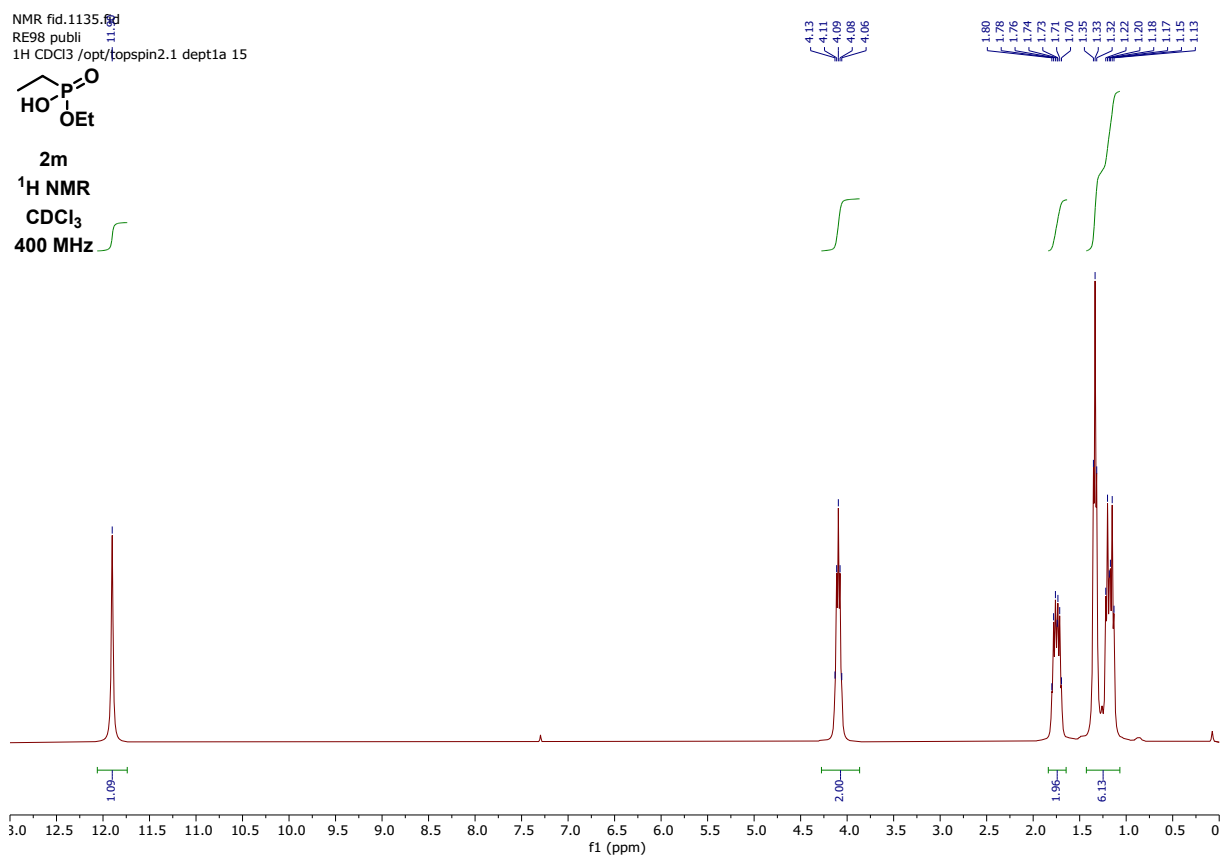

NMR fid.1137.fid  
RE98 publi  
13C{1H} CDCl3 /opt/topspin2.1 dept1a 15

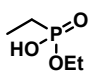

2m  
13C NMR  
CDCl3  
101 MHz

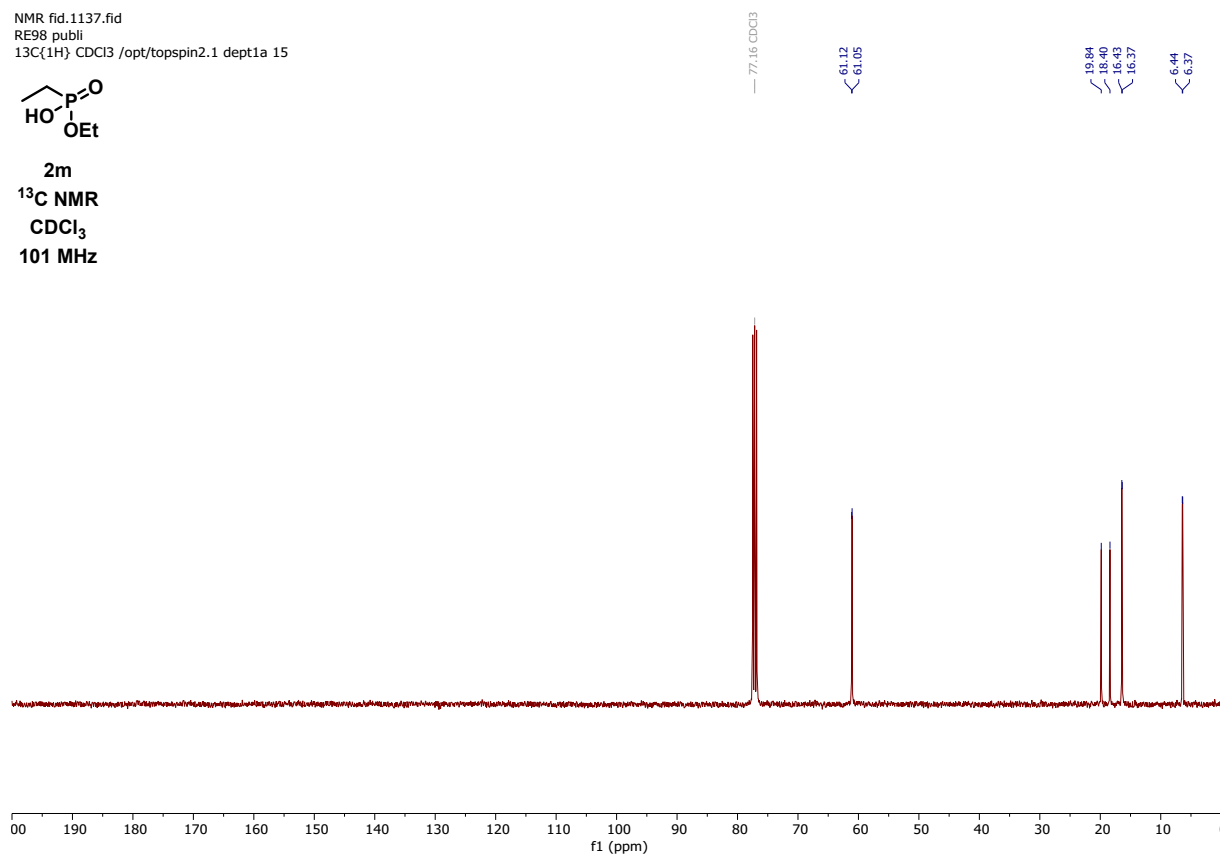

NMR fid.1136.fid  
RE98 publi  
31P{1H} CDCl3 /opt/topspin2.1 dept1a 15

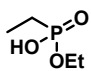

2m  
31P NMR  
CDCl3  
162 MHz

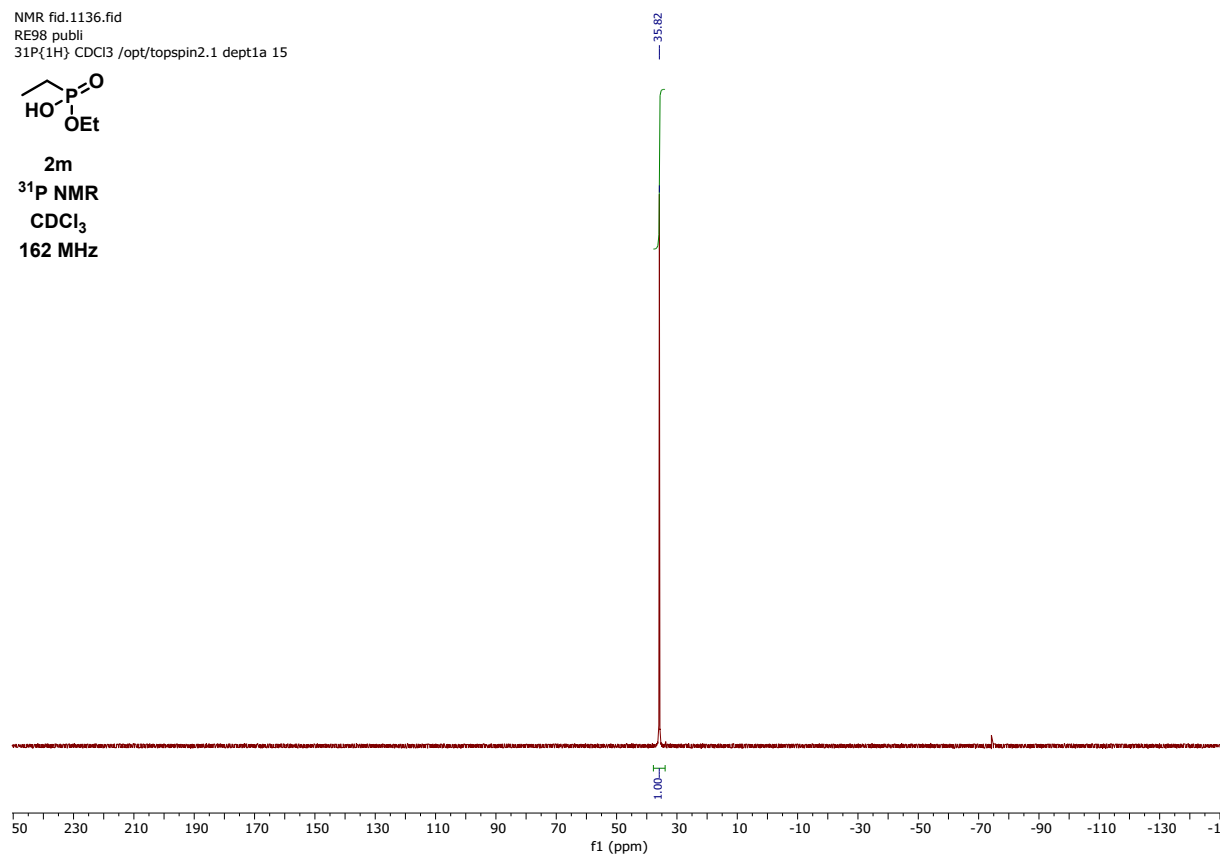



# Methylthiomethylphosphonic acid monoethyl ester (2n)

RMN/LM203 brut 1H  
LM203 brut  
1H CDCl<sub>3</sub> /opt/topspin2.1 dept1a 5

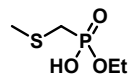

2n  
<sup>1</sup>H NMR  
CDCl<sub>3</sub>  
400 MHz

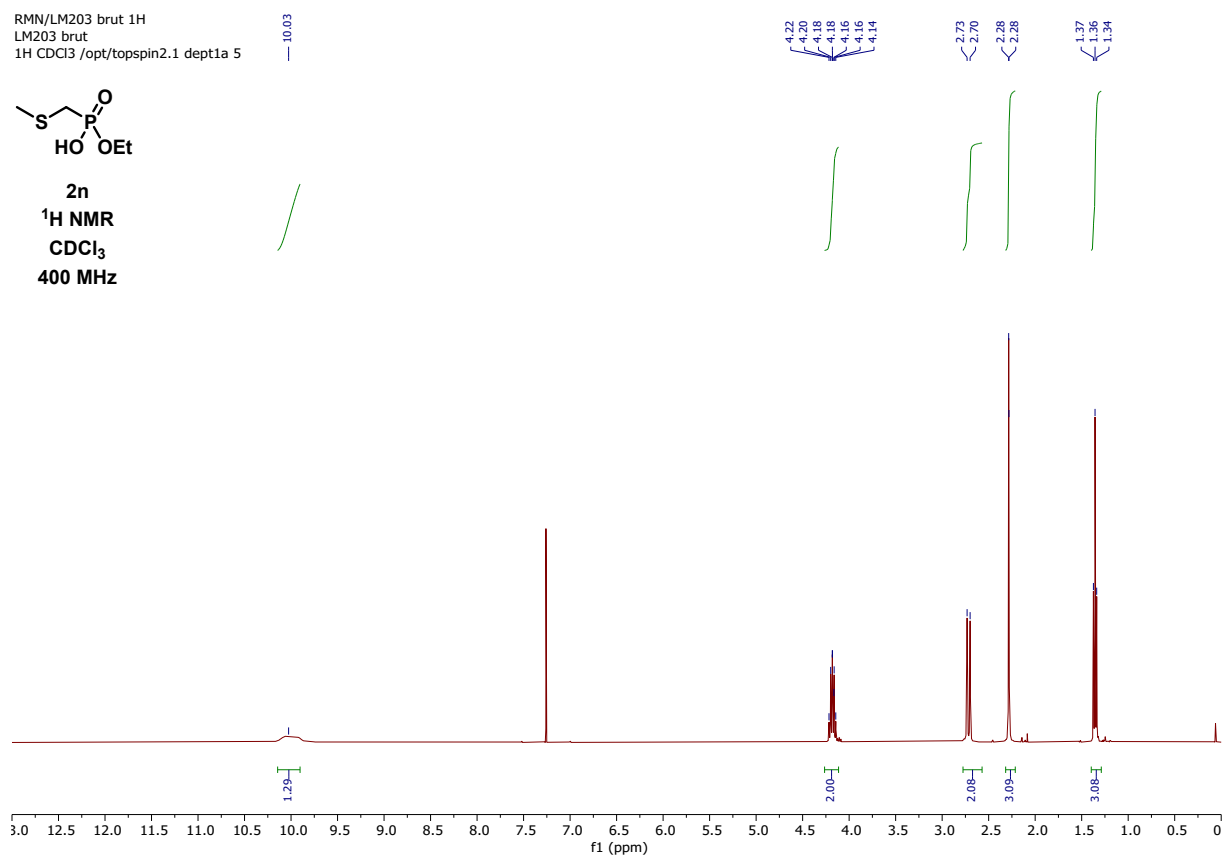

RMN/LM203 brut 13C  
LM203 brut  
13C{1H} CDCl<sub>3</sub> /opt/topspin2.1 dept1a 5

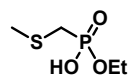

2n  
<sup>13</sup>C NMR  
CDCl<sub>3</sub>  
101 MHz

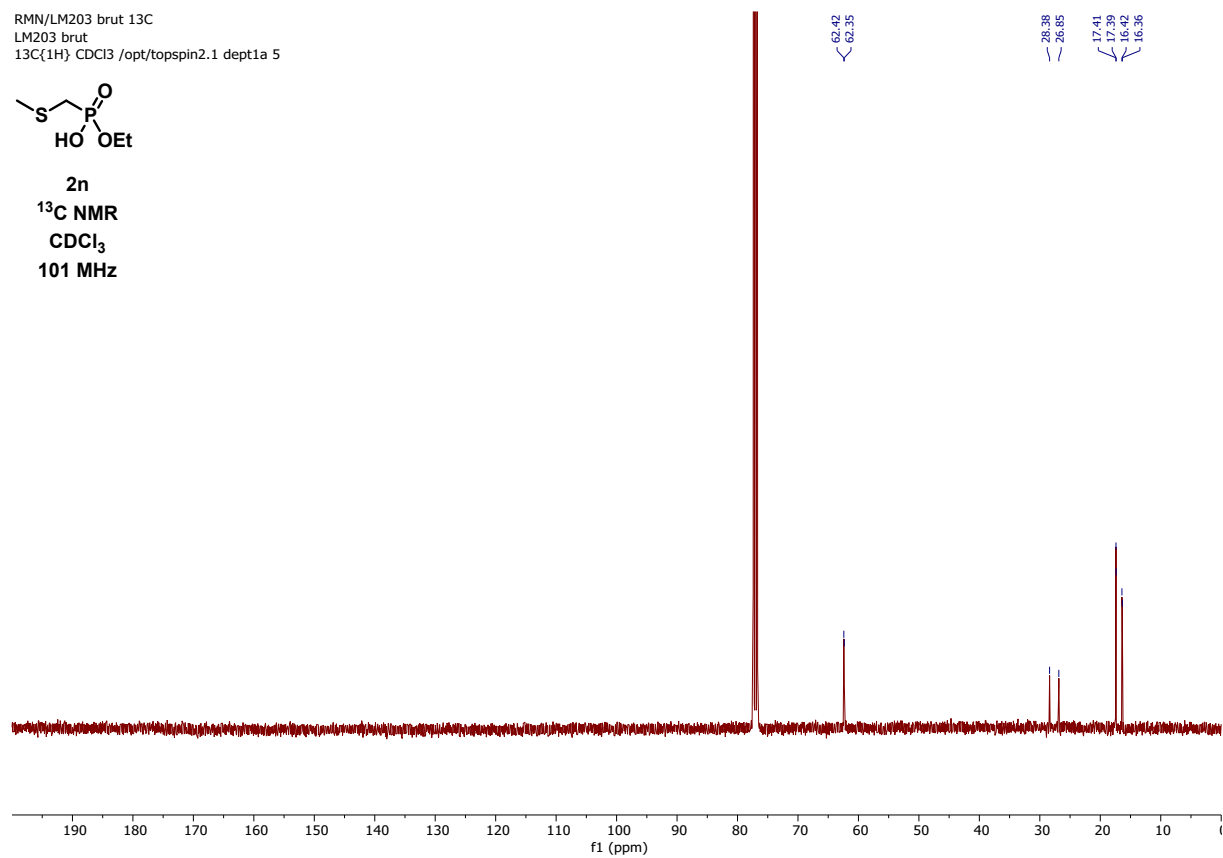

RMN/LM203 brut 31P  
LM203 brut  
31P(1H) CDCl3 /opt/topspin2.1 dept1a 5

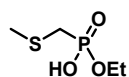

**2n**  
**<sup>31</sup>P NMR**  
**CDCl<sub>3</sub>**  
**162 MHz**

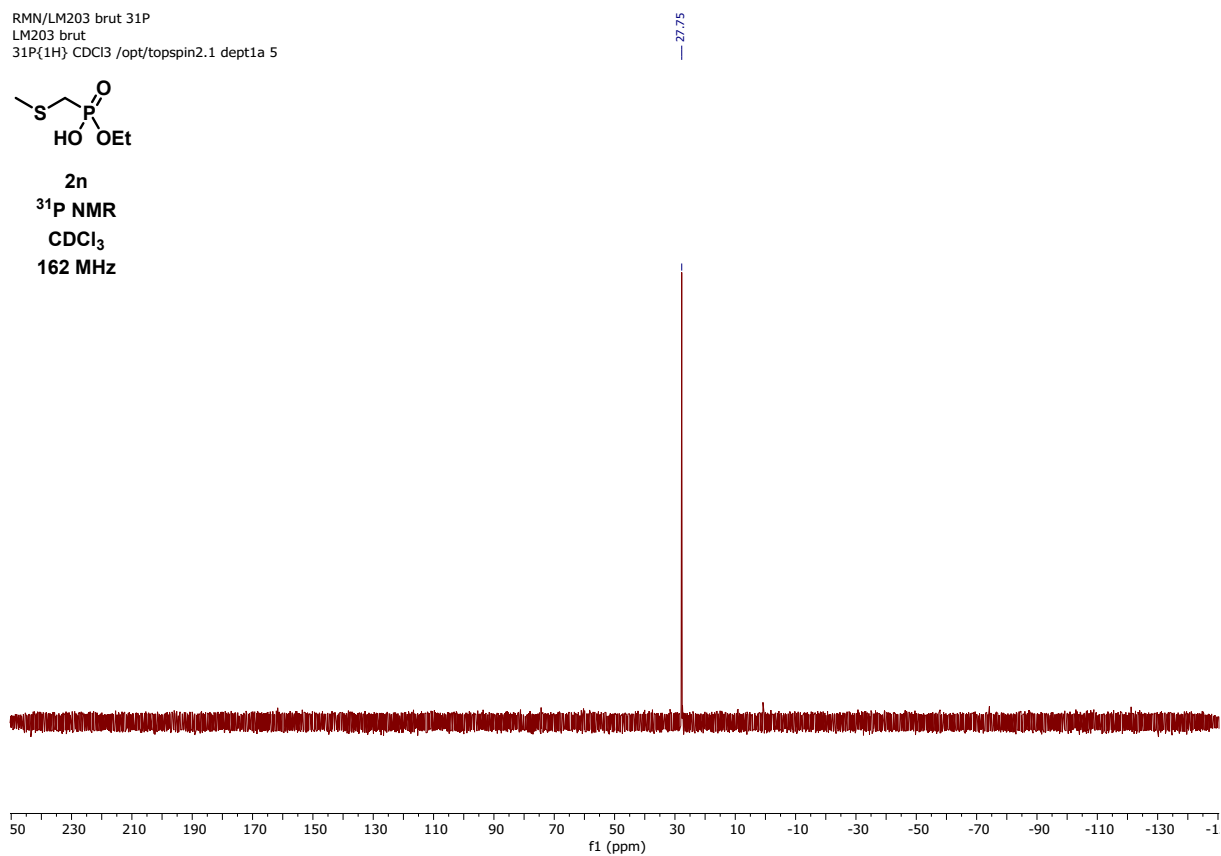

## Cyclopropylmethylphosphonic acid monoethyl ester (2o)

RMN/LM201 1H  
LM201 brut  
1H CDCl3 /opt/topspin2.1 dept1a 9

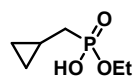

**2o**  
**<sup>1</sup>H NMR**  
**CDCl<sub>3</sub>**  
**400 MHz**

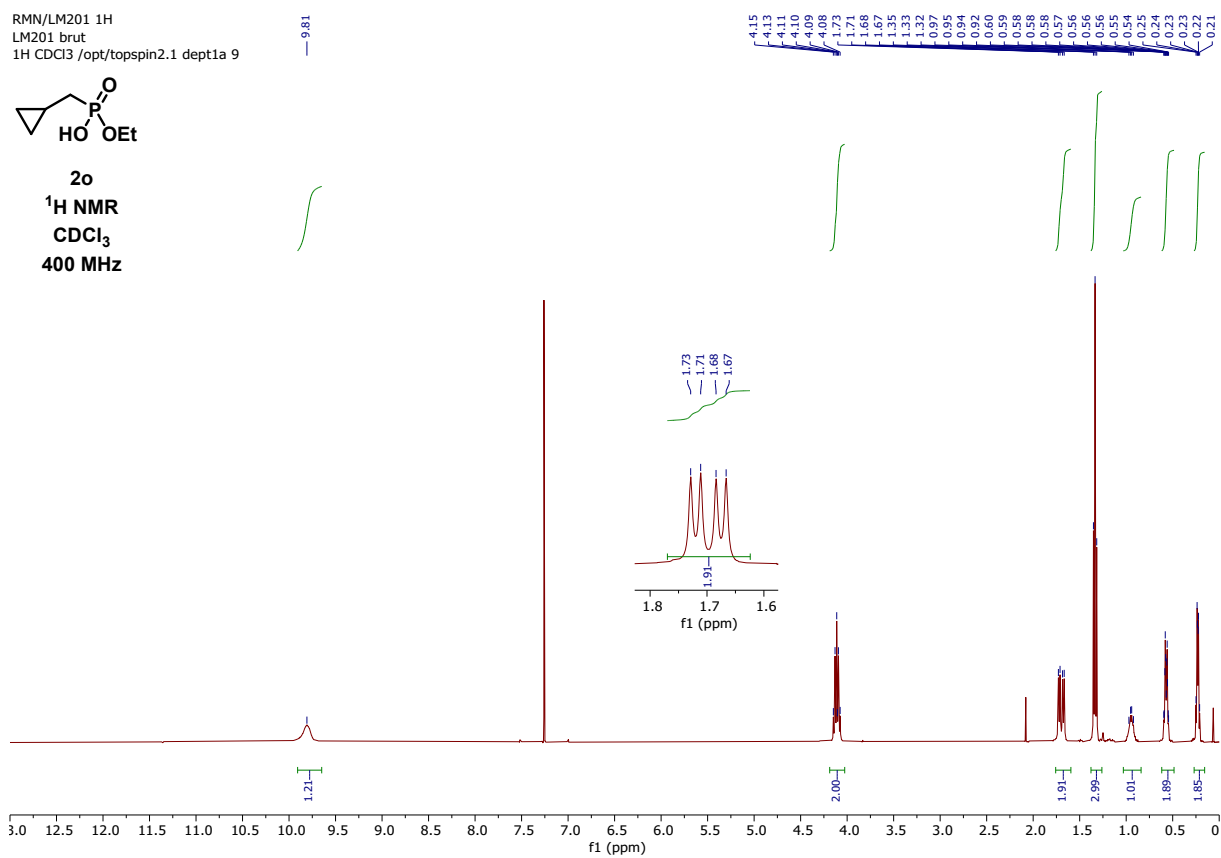

RMN/LM201 13C  
LM201 pur  
13C(1H) CDCl3 /opt/topspin2.1 dept1a 18

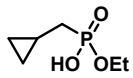

**2o**  
**<sup>13</sup>C NMR**  
**CDCl<sub>3</sub>**  
**101 MHz**

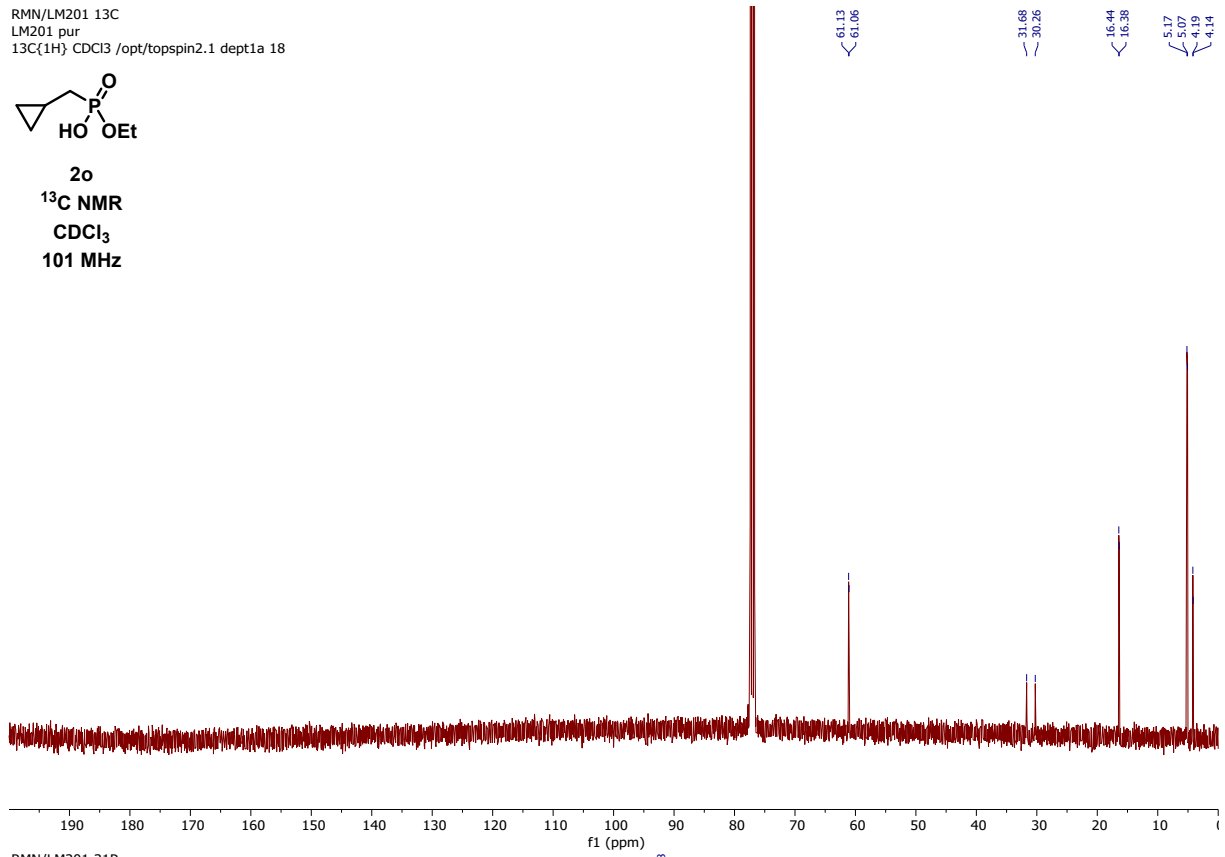

RMN/LM201 31P  
LM201 brut  
31P(1H) CDCl3 /opt/topspin2.1 dept1a 9

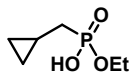

**2o**  
**<sup>31</sup>P NMR**  
**CDCl<sub>3</sub>**  
**162 MHz**

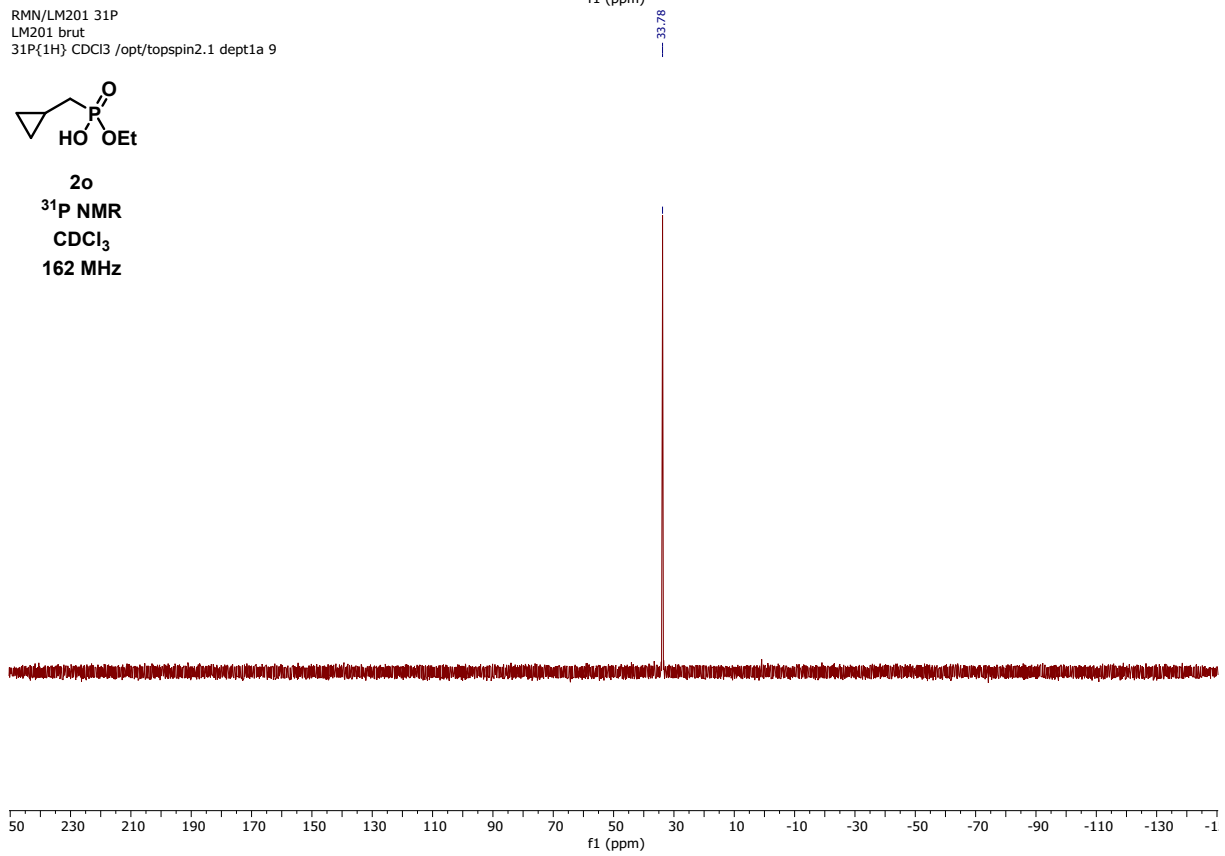

# Phenylphosphonic acid monoethyl ester (2p)

NMR fid.1338.fid  
RE99 publl  
1H CDCl3 /opt/topspin2.1 dept1a 16

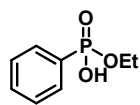

2p  
1H NMR  
CDCl3  
400 MHz

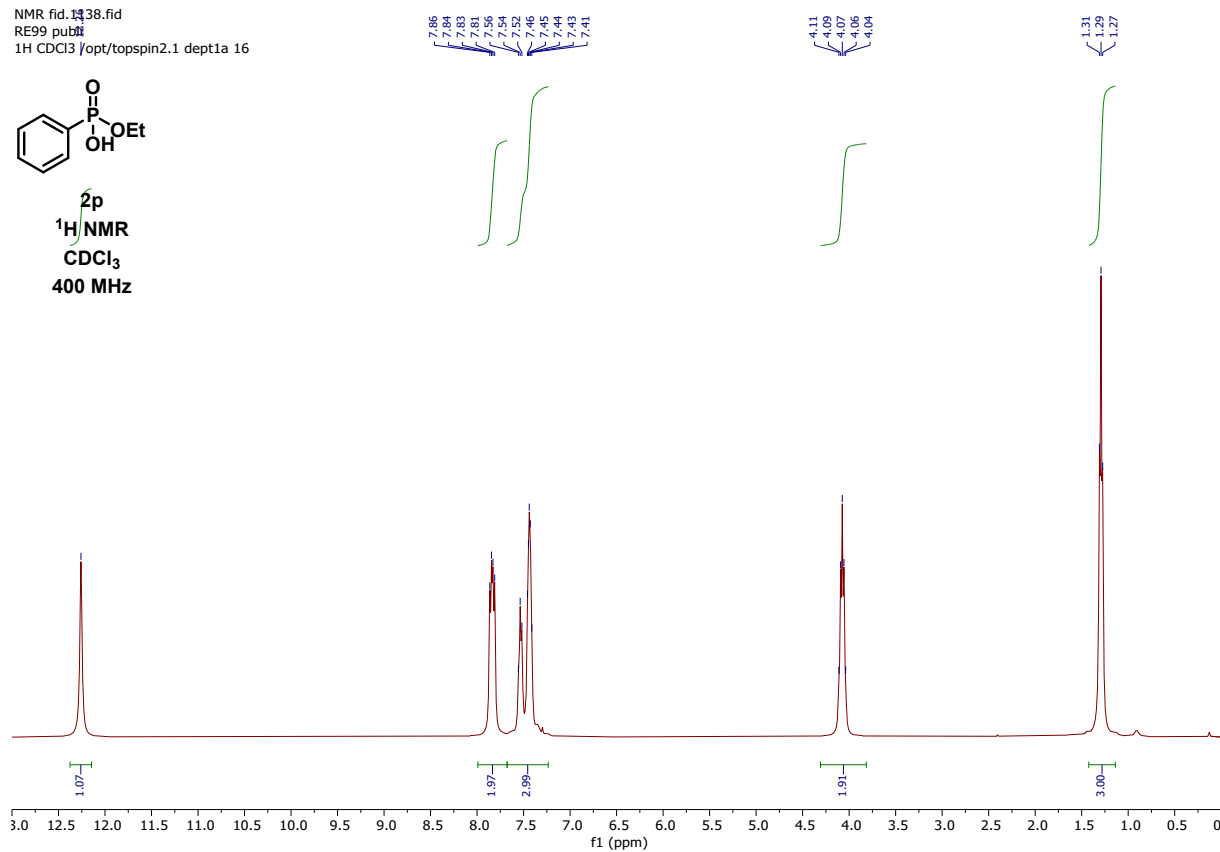

NMR fid.1140.fid  
RE99 publl  
13C(1H) CDCl3 /opt/topspin2.1 dept1a 16

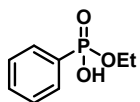

2p  
13C NMR  
CDCl3  
101 MHz

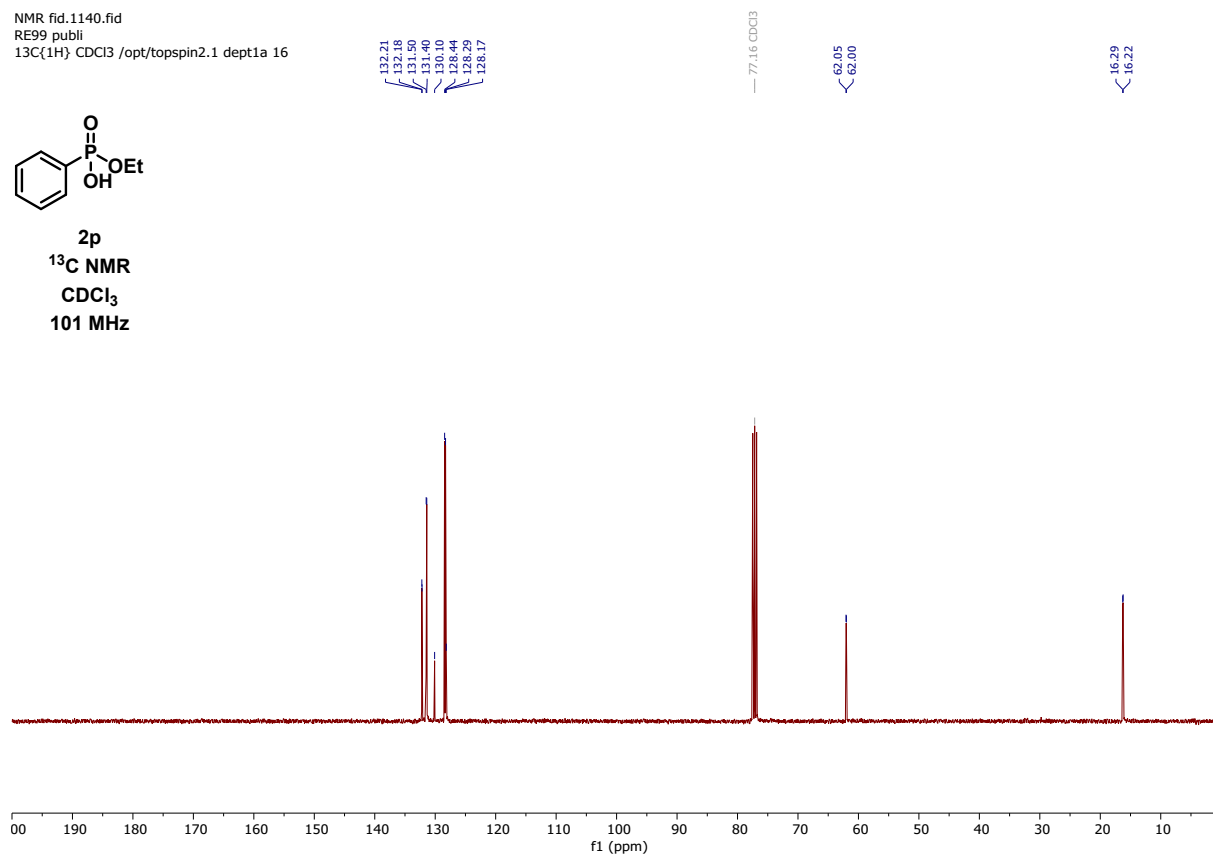

NMR fid.1139.fid  
 RE99 publi  
 31P{1H} CDCl3 /opt/topspin2.1 dept1a 16

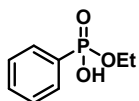

2p  
<sup>31</sup>P NMR  
 CDCl<sub>3</sub>  
 162 MHz

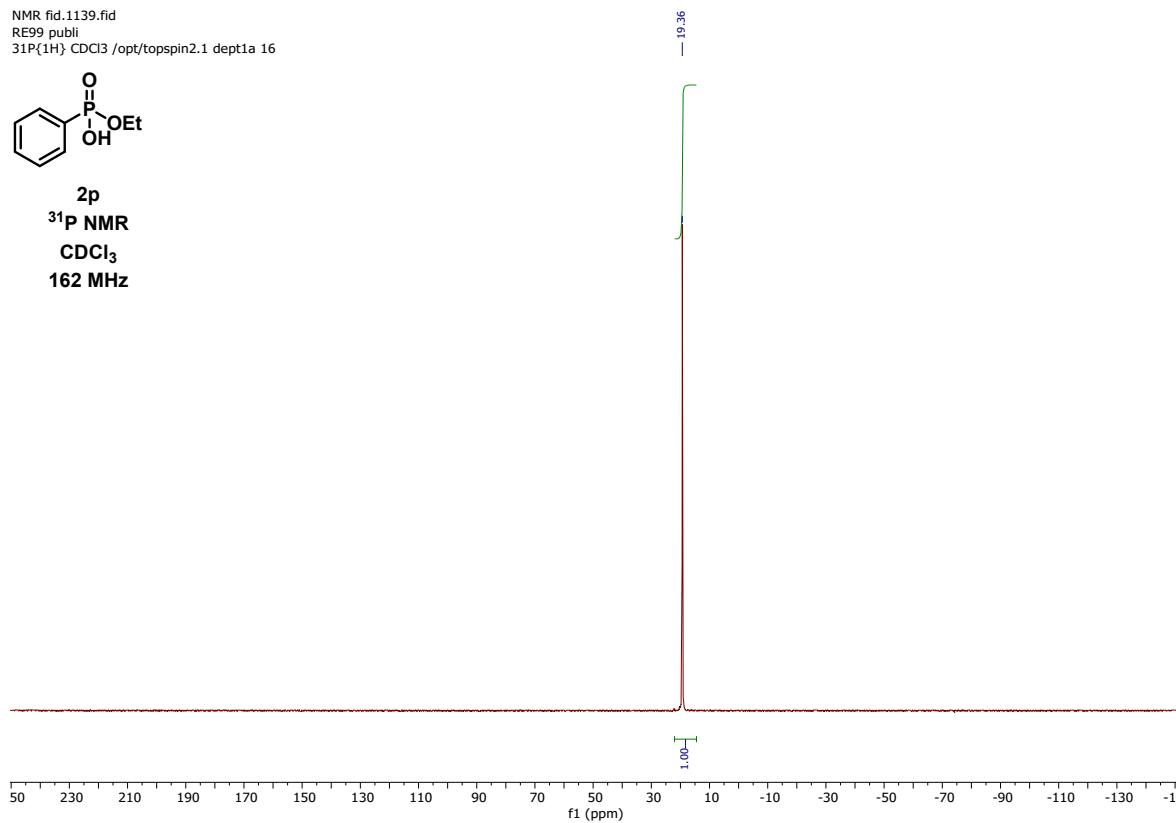

### 3-Fluorophenylphosphonic acid monoethyl ester (2q)

RMN/LM227 DMSO 1H  
 LM227 DMSO  
 1H DMSO /opt/topspin2.1 dept1a 21

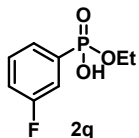

2q  
<sup>1</sup>H NMR  
 DMSO-d<sub>6</sub>  
 400 MHz

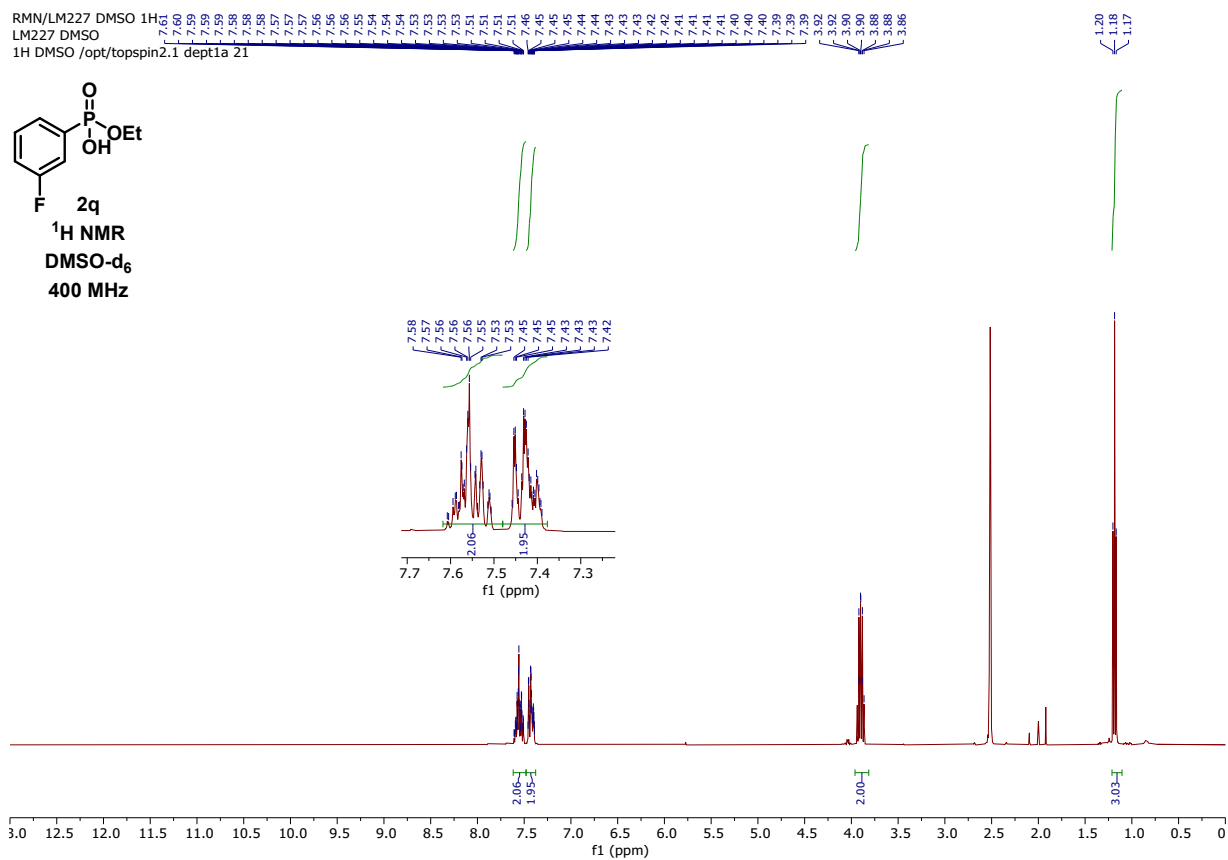

RMN/LM227 DMSO 13C  
LM227 DMSO  
13C{1H} DMSO /opt/topspin2.1 dept1a 21

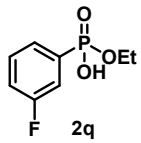

<sup>13</sup>C NMR  
DMSO-d<sub>6</sub>  
101 MHz

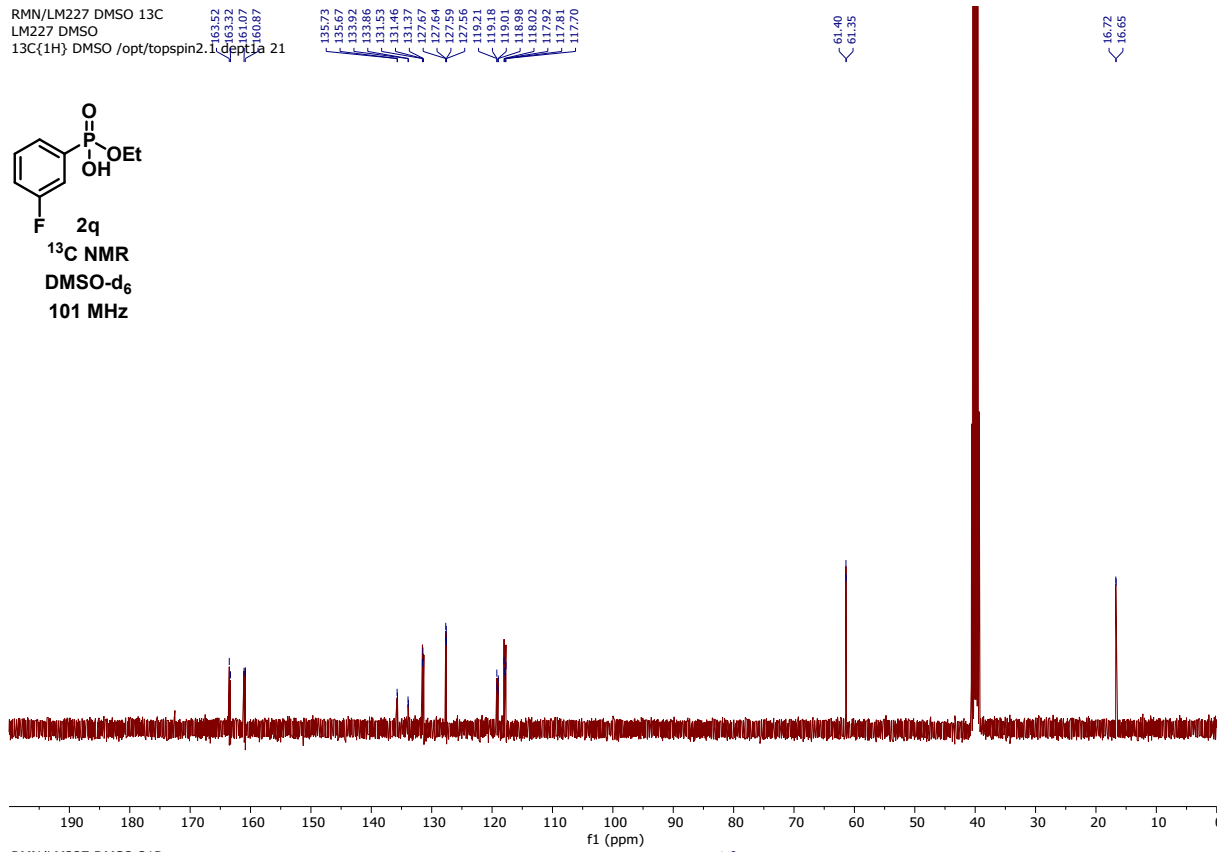

RMN/LM227 DMSO 31P  
LM227 DMSO  
31P{1H} DMSO /opt/topspin2.1 dept1a 21

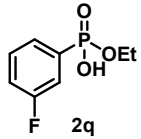

<sup>31</sup>P NMR  
DMSO-d<sub>6</sub>  
162 MHz

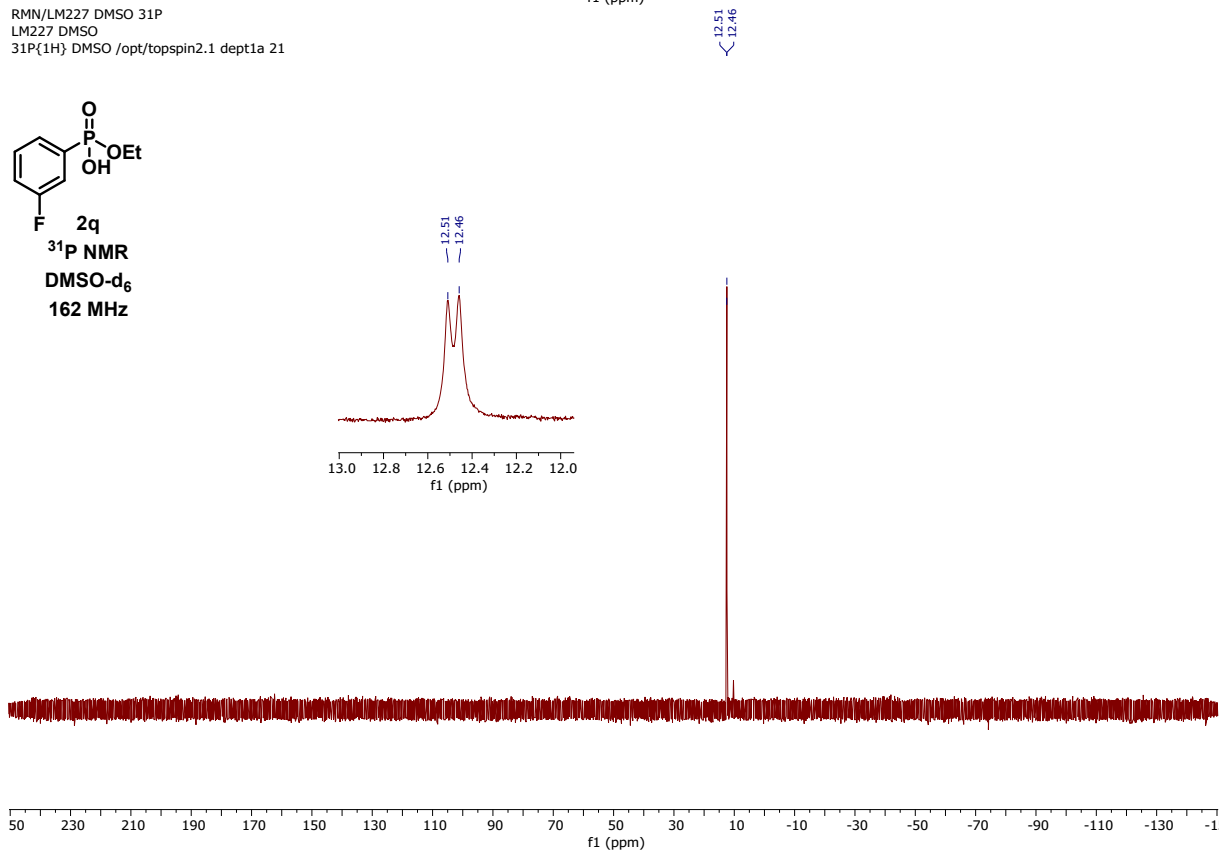

# 4-Methylphenylphosphonic acid monoethyl ester (2r)

RMN/LM229 1H  
LM229  
1H DMSO /opt/topspin2.1 dept1a 4

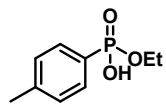

**2r**  
**<sup>1</sup>H NMR**  
**DMSO-d<sub>6</sub>**  
**400 MHz**

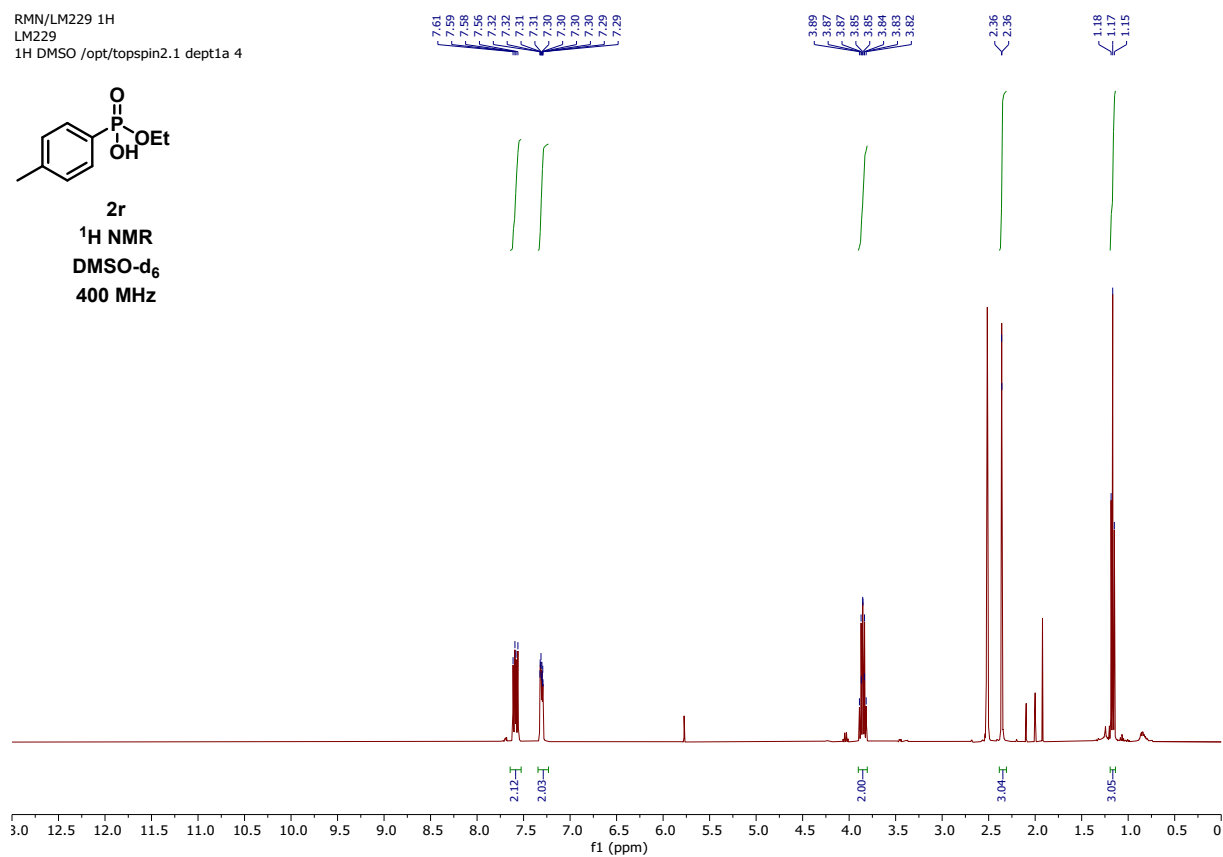

RMN/LM229 13C  
LM229  
13C(1H) DMSO /opt/topspin2.1 dept1a 4

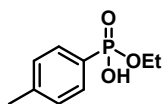

**2r**  
**<sup>13</sup>C NMR**  
**DMSO-d<sub>6</sub>**  
**101 MHz**

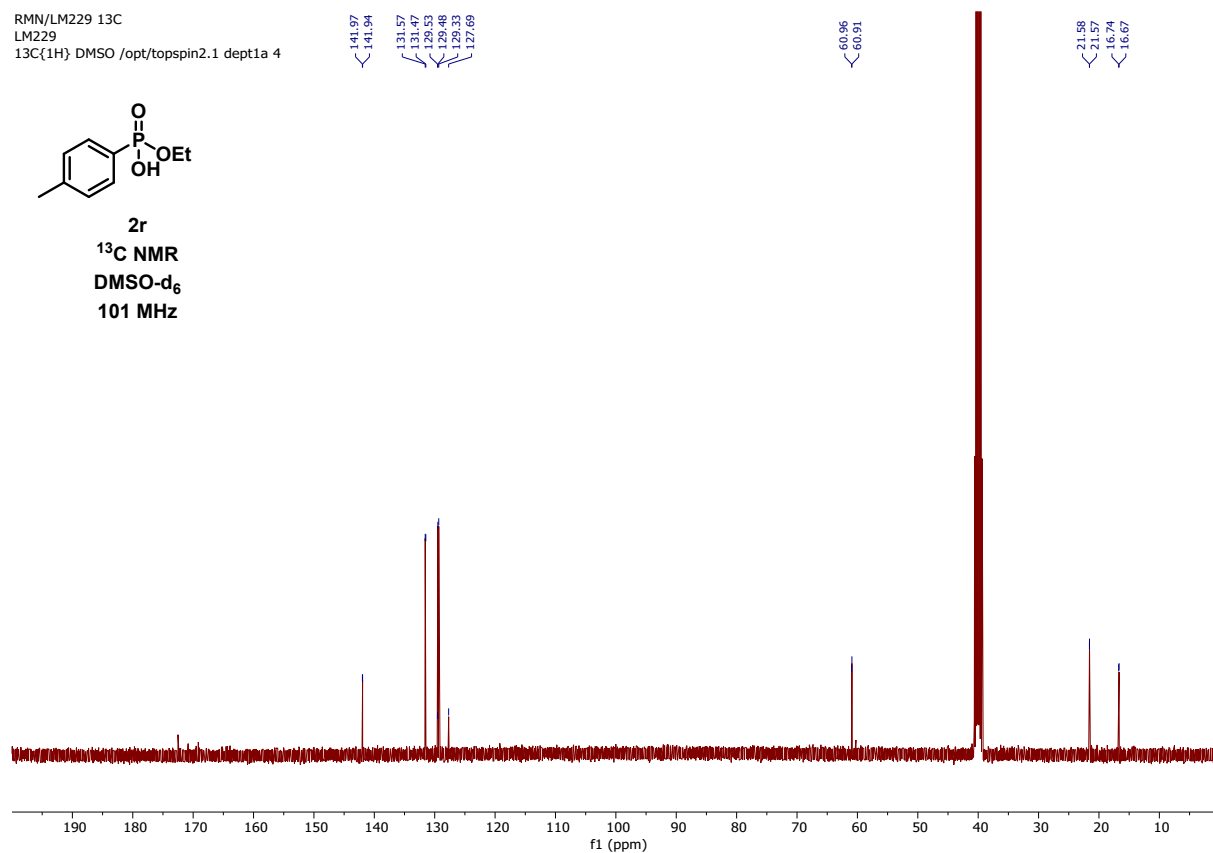

RMN/LM229 31P  
LM229  
31P{1H} DMSO /opt/topspin2.1 dept1a 4

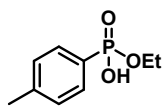

2r  
<sup>31</sup>P NMR  
DMSO-d<sub>6</sub>  
162 MHz

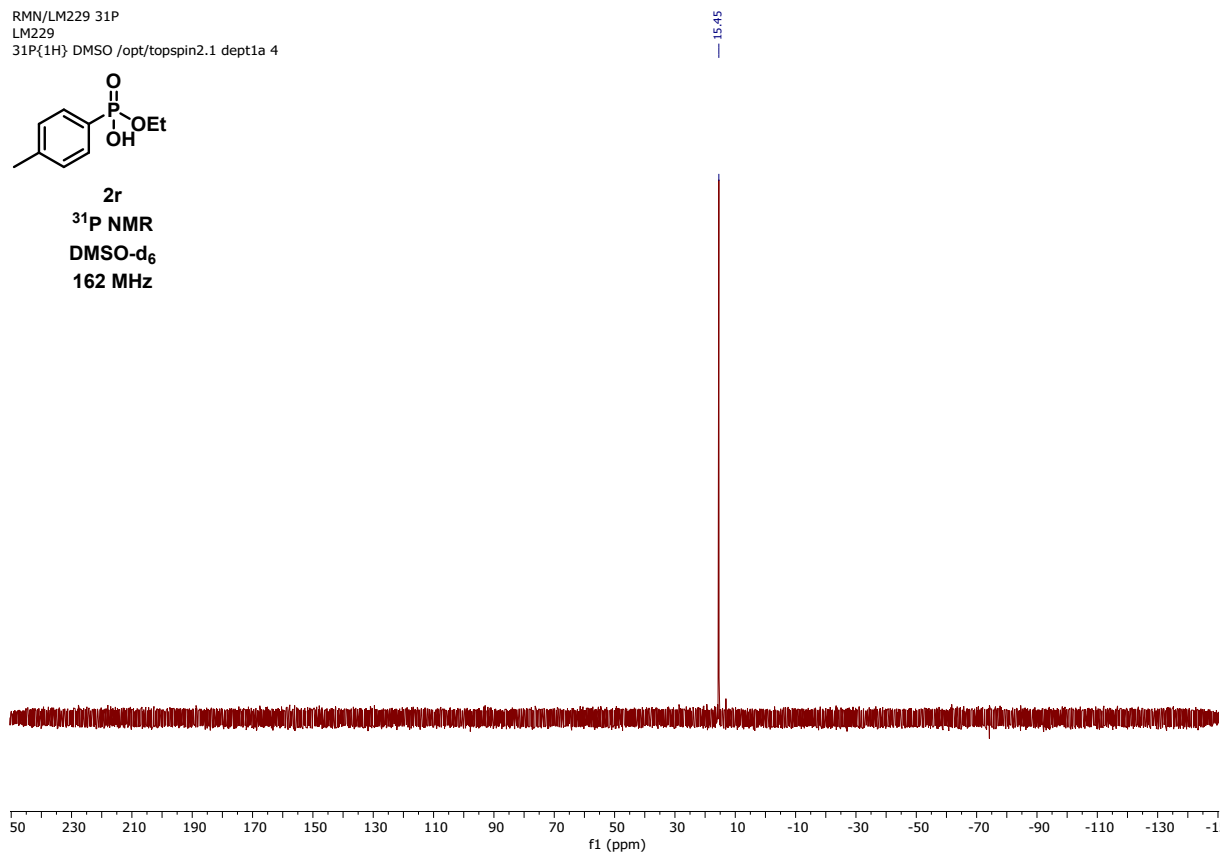



## 6. Metrics

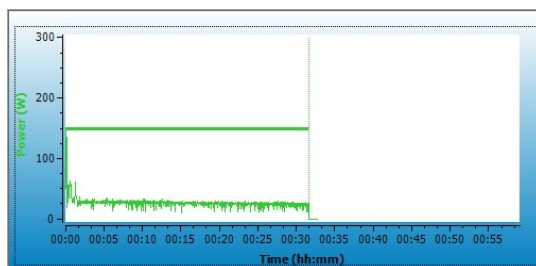

**Figure 4:** Power consumption for the synthesis of compound **2a** monitored by CEM Explorer software.

| Reactant (Limiting reactant)                                                                                                                                                                                                                                                                                                                                                                                                                                                                                                                                                                                                                                                                                                                                                                                       | Mass (g)     | MW            | Mol       | Catalyst | Mass (g) | Reagent | Mass (g) | Reaction Solvent Volume (cm <sup>3</sup> ) | Density (g ml <sup>-1</sup> ) | Mass (g) | Work up chemical  | Mass (g)     | Work up solvent Volume (cm <sup>3</sup> ) | Density (g ml <sup>-1</sup> ) | Mass (g) |              |      |       |      |            |       |    |      |     |      |    |      |           |       |              |     |                  |     |         |     |            |       |          |      |         |      |         |      |    |     |  |       |        |           |                   |      |   |
|--------------------------------------------------------------------------------------------------------------------------------------------------------------------------------------------------------------------------------------------------------------------------------------------------------------------------------------------------------------------------------------------------------------------------------------------------------------------------------------------------------------------------------------------------------------------------------------------------------------------------------------------------------------------------------------------------------------------------------------------------------------------------------------------------------------------|--------------|---------------|-----------|----------|----------|---------|----------|--------------------------------------------|-------------------------------|----------|-------------------|--------------|-------------------------------------------|-------------------------------|----------|--------------|------|-------|------|------------|-------|----|------|-----|------|----|------|-----------|-------|--------------|-----|------------------|-----|---------|-----|------------|-------|----------|------|---------|------|---------|------|----|-----|--|-------|--------|-----------|-------------------|------|---|
| Phosphonate                                                                                                                                                                                                                                                                                                                                                                                                                                                                                                                                                                                                                                                                                                                                                                                                        | 0,296        | 296,35        | 0,000999  |          |          | EtOH    | 1        | 0,789                                      | 0,789                         |          | HCl               | 0,185        | Water                                     | 10                            | 1        | 10           |      |       |      |            |       |    |      |     |      |    |      |           |       |              |     |                  |     |         |     |            |       |          |      |         |      |         |      |    |     |  |       |        |           |                   |      |   |
| NaOH                                                                                                                                                                                                                                                                                                                                                                                                                                                                                                                                                                                                                                                                                                                                                                                                               | 0,096        | 40            | 0,0024    |          |          |         |          |                                            |                               |          | NaCl              | 1,5          | EtOAc                                     | 35                            | 0,89     | 31,15        |      |       |      |            |       |    |      |     |      |    |      |           |       |              |     |                  |     |         |     |            |       |          |      |         |      |         |      |    |     |  |       |        |           |                   |      |   |
|                                                                                                                                                                                                                                                                                                                                                                                                                                                                                                                                                                                                                                                                                                                                                                                                                    |              |               | #DIV/0!   |          |          |         |          |                                            |                               |          | MgSO <sub>4</sub> | 1,5          |                                           |                               |          | 0            |      |       |      |            |       |    |      |     |      |    |      |           |       |              |     |                  |     |         |     |            |       |          |      |         |      |         |      |    |     |  |       |        |           |                   |      |   |
|                                                                                                                                                                                                                                                                                                                                                                                                                                                                                                                                                                                                                                                                                                                                                                                                                    |              |               | #DIV/0!   |          |          |         |          |                                            |                               |          |                   |              |                                           |                               |          | 0            |      |       |      |            |       |    |      |     |      |    |      |           |       |              |     |                  |     |         |     |            |       |          |      |         |      |         |      |    |     |  |       |        |           |                   |      |   |
|                                                                                                                                                                                                                                                                                                                                                                                                                                                                                                                                                                                                                                                                                                                                                                                                                    |              |               | #DIV/0!   |          |          |         |          |                                            |                               |          |                   |              |                                           |                               |          | 0            |      |       |      |            |       |    |      |     |      |    |      |           |       |              |     |                  |     |         |     |            |       |          |      |         |      |         |      |    |     |  |       |        |           |                   |      |   |
|                                                                                                                                                                                                                                                                                                                                                                                                                                                                                                                                                                                                                                                                                                                                                                                                                    |              |               | #DIV/0!   |          |          |         |          |                                            |                               |          |                   |              |                                           |                               |          | 0            |      |       |      |            |       |    |      |     |      |    |      |           |       |              |     |                  |     |         |     |            |       |          |      |         |      |         |      |    |     |  |       |        |           |                   |      |   |
|                                                                                                                                                                                                                                                                                                                                                                                                                                                                                                                                                                                                                                                                                                                                                                                                                    |              |               | #DIV/0!   |          |          |         |          |                                            |                               |          |                   |              |                                           |                               |          | 0            |      |       |      |            |       |    |      |     |      |    |      |           |       |              |     |                  |     |         |     |            |       |          |      |         |      |         |      |    |     |  |       |        |           |                   |      |   |
|                                                                                                                                                                                                                                                                                                                                                                                                                                                                                                                                                                                                                                                                                                                                                                                                                    |              |               | #DIV/0!   |          |          |         |          |                                            |                               |          |                   |              |                                           |                               |          | 0            |      |       |      |            |       |    |      |     |      |    |      |           |       |              |     |                  |     |         |     |            |       |          |      |         |      |         |      |    |     |  |       |        |           |                   |      |   |
| <b>Total</b>                                                                                                                                                                                                                                                                                                                                                                                                                                                                                                                                                                                                                                                                                                                                                                                                       | <b>0,392</b> | <b>336,35</b> |           |          | <b>0</b> |         | <b>0</b> |                                            | <b>0,789</b>                  |          |                   | <b>3,185</b> |                                           |                               |          | <b>41,15</b> |      |       |      |            |       |    |      |     |      |    |      |           |       |              |     |                  |     |         |     |            |       |          |      |         |      |         |      |    |     |  |       |        |           |                   |      |   |
| $RME = \frac{\text{mass of isolated product}}{\text{total mass of reactants}} \times 100$ $AE = \frac{\text{molecular weight of product}}{\text{total molecular weight of reactants}} \times 100$ $\text{mass intensity} = \frac{\text{total mass in a process or process step}}{\text{mass of product}}$ $OE = \frac{RME}{AE} \times 100$                                                                                                                                                                                                                                                                                                                                                                                                                                                                         |              |               |           |          |          |         |          |                                            |                               |          |                   |              |                                           |                               |          |              |      |       |      |            |       |    |      |     |      |    |      |           |       |              |     |                  |     |         |     |            |       |          |      |         |      |         |      |    |     |  |       |        |           |                   |      |   |
| <table border="1"> <tr><td>Eco-Scale</td><td>85,5</td></tr> <tr><td>Yield</td><td>95,2</td></tr> <tr><td>Conversion</td><td>100,0</td></tr> <tr><td>AE</td><td>79,8</td></tr> <tr><td>RME</td><td>65,1</td></tr> <tr><td>OE</td><td>81,6</td></tr> <tr><td>PMI total</td><td>178,5</td></tr> <tr><td>PMI reaction</td><td>4,6</td></tr> <tr><td>reagent catalyst</td><td>1,5</td></tr> <tr><td>solvent</td><td>3,1</td></tr> <tr><td>PMI Workup</td><td>173,9</td></tr> <tr><td>chemical</td><td>12,5</td></tr> <tr><td>solvent</td><td>16,4</td></tr> </table> <table border="1"> <tr><th>Product</th><th>Mass</th><th>MW</th><th>Mol</th></tr> <tr><td></td><td>0,255</td><td>268,29</td><td>0,0009505</td></tr> </table> <table border="1"> <tr><td>Unreacted limited</td><td>mass</td><td>0</td></tr> </table> |              |               |           |          |          |         |          |                                            |                               |          |                   |              |                                           |                               |          | Eco-Scale    | 85,5 | Yield | 95,2 | Conversion | 100,0 | AE | 79,8 | RME | 65,1 | OE | 81,6 | PMI total | 178,5 | PMI reaction | 4,6 | reagent catalyst | 1,5 | solvent | 3,1 | PMI Workup | 173,9 | chemical | 12,5 | solvent | 16,4 | Product | Mass | MW | Mol |  | 0,255 | 268,29 | 0,0009505 | Unreacted limited | mass | 0 |
| Eco-Scale                                                                                                                                                                                                                                                                                                                                                                                                                                                                                                                                                                                                                                                                                                                                                                                                          | 85,5         |               |           |          |          |         |          |                                            |                               |          |                   |              |                                           |                               |          |              |      |       |      |            |       |    |      |     |      |    |      |           |       |              |     |                  |     |         |     |            |       |          |      |         |      |         |      |    |     |  |       |        |           |                   |      |   |
| Yield                                                                                                                                                                                                                                                                                                                                                                                                                                                                                                                                                                                                                                                                                                                                                                                                              | 95,2         |               |           |          |          |         |          |                                            |                               |          |                   |              |                                           |                               |          |              |      |       |      |            |       |    |      |     |      |    |      |           |       |              |     |                  |     |         |     |            |       |          |      |         |      |         |      |    |     |  |       |        |           |                   |      |   |
| Conversion                                                                                                                                                                                                                                                                                                                                                                                                                                                                                                                                                                                                                                                                                                                                                                                                         | 100,0        |               |           |          |          |         |          |                                            |                               |          |                   |              |                                           |                               |          |              |      |       |      |            |       |    |      |     |      |    |      |           |       |              |     |                  |     |         |     |            |       |          |      |         |      |         |      |    |     |  |       |        |           |                   |      |   |
| AE                                                                                                                                                                                                                                                                                                                                                                                                                                                                                                                                                                                                                                                                                                                                                                                                                 | 79,8         |               |           |          |          |         |          |                                            |                               |          |                   |              |                                           |                               |          |              |      |       |      |            |       |    |      |     |      |    |      |           |       |              |     |                  |     |         |     |            |       |          |      |         |      |         |      |    |     |  |       |        |           |                   |      |   |
| RME                                                                                                                                                                                                                                                                                                                                                                                                                                                                                                                                                                                                                                                                                                                                                                                                                | 65,1         |               |           |          |          |         |          |                                            |                               |          |                   |              |                                           |                               |          |              |      |       |      |            |       |    |      |     |      |    |      |           |       |              |     |                  |     |         |     |            |       |          |      |         |      |         |      |    |     |  |       |        |           |                   |      |   |
| OE                                                                                                                                                                                                                                                                                                                                                                                                                                                                                                                                                                                                                                                                                                                                                                                                                 | 81,6         |               |           |          |          |         |          |                                            |                               |          |                   |              |                                           |                               |          |              |      |       |      |            |       |    |      |     |      |    |      |           |       |              |     |                  |     |         |     |            |       |          |      |         |      |         |      |    |     |  |       |        |           |                   |      |   |
| PMI total                                                                                                                                                                                                                                                                                                                                                                                                                                                                                                                                                                                                                                                                                                                                                                                                          | 178,5        |               |           |          |          |         |          |                                            |                               |          |                   |              |                                           |                               |          |              |      |       |      |            |       |    |      |     |      |    |      |           |       |              |     |                  |     |         |     |            |       |          |      |         |      |         |      |    |     |  |       |        |           |                   |      |   |
| PMI reaction                                                                                                                                                                                                                                                                                                                                                                                                                                                                                                                                                                                                                                                                                                                                                                                                       | 4,6          |               |           |          |          |         |          |                                            |                               |          |                   |              |                                           |                               |          |              |      |       |      |            |       |    |      |     |      |    |      |           |       |              |     |                  |     |         |     |            |       |          |      |         |      |         |      |    |     |  |       |        |           |                   |      |   |
| reagent catalyst                                                                                                                                                                                                                                                                                                                                                                                                                                                                                                                                                                                                                                                                                                                                                                                                   | 1,5          |               |           |          |          |         |          |                                            |                               |          |                   |              |                                           |                               |          |              |      |       |      |            |       |    |      |     |      |    |      |           |       |              |     |                  |     |         |     |            |       |          |      |         |      |         |      |    |     |  |       |        |           |                   |      |   |
| solvent                                                                                                                                                                                                                                                                                                                                                                                                                                                                                                                                                                                                                                                                                                                                                                                                            | 3,1          |               |           |          |          |         |          |                                            |                               |          |                   |              |                                           |                               |          |              |      |       |      |            |       |    |      |     |      |    |      |           |       |              |     |                  |     |         |     |            |       |          |      |         |      |         |      |    |     |  |       |        |           |                   |      |   |
| PMI Workup                                                                                                                                                                                                                                                                                                                                                                                                                                                                                                                                                                                                                                                                                                                                                                                                         | 173,9        |               |           |          |          |         |          |                                            |                               |          |                   |              |                                           |                               |          |              |      |       |      |            |       |    |      |     |      |    |      |           |       |              |     |                  |     |         |     |            |       |          |      |         |      |         |      |    |     |  |       |        |           |                   |      |   |
| chemical                                                                                                                                                                                                                                                                                                                                                                                                                                                                                                                                                                                                                                                                                                                                                                                                           | 12,5         |               |           |          |          |         |          |                                            |                               |          |                   |              |                                           |                               |          |              |      |       |      |            |       |    |      |     |      |    |      |           |       |              |     |                  |     |         |     |            |       |          |      |         |      |         |      |    |     |  |       |        |           |                   |      |   |
| solvent                                                                                                                                                                                                                                                                                                                                                                                                                                                                                                                                                                                                                                                                                                                                                                                                            | 16,4         |               |           |          |          |         |          |                                            |                               |          |                   |              |                                           |                               |          |              |      |       |      |            |       |    |      |     |      |    |      |           |       |              |     |                  |     |         |     |            |       |          |      |         |      |         |      |    |     |  |       |        |           |                   |      |   |
| Product                                                                                                                                                                                                                                                                                                                                                                                                                                                                                                                                                                                                                                                                                                                                                                                                            | Mass         | MW            | Mol       |          |          |         |          |                                            |                               |          |                   |              |                                           |                               |          |              |      |       |      |            |       |    |      |     |      |    |      |           |       |              |     |                  |     |         |     |            |       |          |      |         |      |         |      |    |     |  |       |        |           |                   |      |   |
|                                                                                                                                                                                                                                                                                                                                                                                                                                                                                                                                                                                                                                                                                                                                                                                                                    | 0,255        | 268,29        | 0,0009505 |          |          |         |          |                                            |                               |          |                   |              |                                           |                               |          |              |      |       |      |            |       |    |      |     |      |    |      |           |       |              |     |                  |     |         |     |            |       |          |      |         |      |         |      |    |     |  |       |        |           |                   |      |   |
| Unreacted limited                                                                                                                                                                                                                                                                                                                                                                                                                                                                                                                                                                                                                                                                                                                                                                                                  | mass         | 0             |           |          |          |         |          |                                            |                               |          |                   |              |                                           |                               |          |              |      |       |      |            |       |    |      |     |      |    |      |           |       |              |     |                  |     |         |     |            |       |          |      |         |      |         |      |    |     |  |       |        |           |                   |      |   |

**Figure 5:** Green Metrics for the general procedure applied on the synthesis of compound **2a**.

| Reactant (Lin Mass (g))                                                                                                                                                                                                                                                                                                                                                                                                                                                                                                                                                                                                                                                                                                                                            | MW           | Mol           | Catalyst   | Mass (g) | Reagent  | Mass (g) | Reaction Solv. Volume (cm <sup>3</sup> ) | Density (g m Mass (g)) | Work up chei Mass (g) | Work up solv Volume (cm <sup>3</sup> ) | Density (g m Mass (g)) |              |      |               |  |       |      |            |       |    |      |     |      |    |      |           |       |              |     |               |     |         |     |            |       |          |      |         |      |         |      |    |     |  |       |        |            |              |      |   |
|--------------------------------------------------------------------------------------------------------------------------------------------------------------------------------------------------------------------------------------------------------------------------------------------------------------------------------------------------------------------------------------------------------------------------------------------------------------------------------------------------------------------------------------------------------------------------------------------------------------------------------------------------------------------------------------------------------------------------------------------------------------------|--------------|---------------|------------|----------|----------|----------|------------------------------------------|------------------------|-----------------------|----------------------------------------|------------------------|--------------|------|---------------|--|-------|------|------------|-------|----|------|-----|------|----|------|-----------|-------|--------------|-----|---------------|-----|---------|-----|------------|-------|----------|------|---------|------|---------|------|----|-----|--|-------|--------|------------|--------------|------|---|
| Phosphonate                                                                                                                                                                                                                                                                                                                                                                                                                                                                                                                                                                                                                                                                                                                                                        | 0,296        | 296,35        | 0,00099882 |          | EtOH     | 1        | 0,789                                    | 0,789                  | Citric acid           | 0,5                                    | Water                  | 5            | 1    | 5             |  |       |      |            |       |    |      |     |      |    |      |           |       |              |     |               |     |         |     |            |       |          |      |         |      |         |      |    |     |  |       |        |            |              |      |   |
| NaOH                                                                                                                                                                                                                                                                                                                                                                                                                                                                                                                                                                                                                                                                                                                                                               | 0,096        | 40            | 0,0024     |          |          |          |                                          |                        | MgSO <sub>4</sub>     | 1,5                                    | EtOAc                  | 15           | 0,89 | 13,35         |  |       |      |            |       |    |      |     |      |    |      |           |       |              |     |               |     |         |     |            |       |          |      |         |      |         |      |    |     |  |       |        |            |              |      |   |
|                                                                                                                                                                                                                                                                                                                                                                                                                                                                                                                                                                                                                                                                                                                                                                    |              |               | #DIV/0!    |          |          |          |                                          |                        |                       |                                        |                        |              |      | 0             |  |       |      |            |       |    |      |     |      |    |      |           |       |              |     |               |     |         |     |            |       |          |      |         |      |         |      |    |     |  |       |        |            |              |      |   |
|                                                                                                                                                                                                                                                                                                                                                                                                                                                                                                                                                                                                                                                                                                                                                                    |              |               | #DIV/0!    |          |          |          |                                          |                        |                       |                                        |                        |              |      | 0             |  |       |      |            |       |    |      |     |      |    |      |           |       |              |     |               |     |         |     |            |       |          |      |         |      |         |      |    |     |  |       |        |            |              |      |   |
|                                                                                                                                                                                                                                                                                                                                                                                                                                                                                                                                                                                                                                                                                                                                                                    |              |               | #DIV/0!    |          |          |          |                                          |                        |                       |                                        |                        |              |      | 0             |  |       |      |            |       |    |      |     |      |    |      |           |       |              |     |               |     |         |     |            |       |          |      |         |      |         |      |    |     |  |       |        |            |              |      |   |
|                                                                                                                                                                                                                                                                                                                                                                                                                                                                                                                                                                                                                                                                                                                                                                    |              |               | #DIV/0!    |          |          |          |                                          |                        |                       |                                        |                        |              |      | 0             |  |       |      |            |       |    |      |     |      |    |      |           |       |              |     |               |     |         |     |            |       |          |      |         |      |         |      |    |     |  |       |        |            |              |      |   |
|                                                                                                                                                                                                                                                                                                                                                                                                                                                                                                                                                                                                                                                                                                                                                                    |              |               | #DIV/0!    |          |          |          |                                          |                        |                       |                                        |                        |              |      | 0             |  |       |      |            |       |    |      |     |      |    |      |           |       |              |     |               |     |         |     |            |       |          |      |         |      |         |      |    |     |  |       |        |            |              |      |   |
|                                                                                                                                                                                                                                                                                                                                                                                                                                                                                                                                                                                                                                                                                                                                                                    |              |               | #DIV/0!    |          |          |          |                                          |                        |                       |                                        |                        |              |      | 0             |  |       |      |            |       |    |      |     |      |    |      |           |       |              |     |               |     |         |     |            |       |          |      |         |      |         |      |    |     |  |       |        |            |              |      |   |
|                                                                                                                                                                                                                                                                                                                                                                                                                                                                                                                                                                                                                                                                                                                                                                    |              |               | #DIV/0!    |          |          |          |                                          |                        |                       |                                        |                        |              |      | 0             |  |       |      |            |       |    |      |     |      |    |      |           |       |              |     |               |     |         |     |            |       |          |      |         |      |         |      |    |     |  |       |        |            |              |      |   |
| <b>Total</b>                                                                                                                                                                                                                                                                                                                                                                                                                                                                                                                                                                                                                                                                                                                                                       | <b>0,392</b> | <b>336,35</b> |            | <b>0</b> | <b>0</b> | <b>0</b> | <b>0,789</b>                             |                        | <b>2</b>              |                                        |                        | <b>18,35</b> |      | <b>21,531</b> |  |       |      |            |       |    |      |     |      |    |      |           |       |              |     |               |     |         |     |            |       |          |      |         |      |         |      |    |     |  |       |        |            |              |      |   |
| <table border="1"> <tr><td>Yield</td><td>71,6</td></tr> <tr><td>Conversion</td><td>100,0</td></tr> <tr><td>AE</td><td>79,8</td></tr> <tr><td>RME</td><td>49,0</td></tr> <tr><td>OE</td><td>61,4</td></tr> <tr><td>PMI total</td><td>112,1</td></tr> <tr><td>PMI reaction</td><td>6,2</td></tr> <tr><td>reagent catal</td><td>2,0</td></tr> <tr><td>solvent</td><td>4,1</td></tr> <tr><td>PMI Workup</td><td>106,0</td></tr> <tr><td>chemical</td><td>10,4</td></tr> <tr><td>solvent</td><td>95,6</td></tr> </table> <table border="1"> <tr><th>Product</th><th>Mass</th><th>MW</th><th>Mol</th></tr> <tr><td></td><td>0,192</td><td>268,29</td><td>0,00071564</td></tr> </table> <table border="1"> <tr><td>Unreacted li</td><td>mass</td><td>0</td></tr> </table> |              |               |            |          |          |          |                                          |                        |                       |                                        |                        |              |      |               |  | Yield | 71,6 | Conversion | 100,0 | AE | 79,8 | RME | 49,0 | OE | 61,4 | PMI total | 112,1 | PMI reaction | 6,2 | reagent catal | 2,0 | solvent | 4,1 | PMI Workup | 106,0 | chemical | 10,4 | solvent | 95,6 | Product | Mass | MW | Mol |  | 0,192 | 268,29 | 0,00071564 | Unreacted li | mass | 0 |
| Yield                                                                                                                                                                                                                                                                                                                                                                                                                                                                                                                                                                                                                                                                                                                                                              | 71,6         |               |            |          |          |          |                                          |                        |                       |                                        |                        |              |      |               |  |       |      |            |       |    |      |     |      |    |      |           |       |              |     |               |     |         |     |            |       |          |      |         |      |         |      |    |     |  |       |        |            |              |      |   |
| Conversion                                                                                                                                                                                                                                                                                                                                                                                                                                                                                                                                                                                                                                                                                                                                                         | 100,0        |               |            |          |          |          |                                          |                        |                       |                                        |                        |              |      |               |  |       |      |            |       |    |      |     |      |    |      |           |       |              |     |               |     |         |     |            |       |          |      |         |      |         |      |    |     |  |       |        |            |              |      |   |
| AE                                                                                                                                                                                                                                                                                                                                                                                                                                                                                                                                                                                                                                                                                                                                                                 | 79,8         |               |            |          |          |          |                                          |                        |                       |                                        |                        |              |      |               |  |       |      |            |       |    |      |     |      |    |      |           |       |              |     |               |     |         |     |            |       |          |      |         |      |         |      |    |     |  |       |        |            |              |      |   |
| RME                                                                                                                                                                                                                                                                                                                                                                                                                                                                                                                                                                                                                                                                                                                                                                | 49,0         |               |            |          |          |          |                                          |                        |                       |                                        |                        |              |      |               |  |       |      |            |       |    |      |     |      |    |      |           |       |              |     |               |     |         |     |            |       |          |      |         |      |         |      |    |     |  |       |        |            |              |      |   |
| OE                                                                                                                                                                                                                                                                                                                                                                                                                                                                                                                                                                                                                                                                                                                                                                 | 61,4         |               |            |          |          |          |                                          |                        |                       |                                        |                        |              |      |               |  |       |      |            |       |    |      |     |      |    |      |           |       |              |     |               |     |         |     |            |       |          |      |         |      |         |      |    |     |  |       |        |            |              |      |   |
| PMI total                                                                                                                                                                                                                                                                                                                                                                                                                                                                                                                                                                                                                                                                                                                                                          | 112,1        |               |            |          |          |          |                                          |                        |                       |                                        |                        |              |      |               |  |       |      |            |       |    |      |     |      |    |      |           |       |              |     |               |     |         |     |            |       |          |      |         |      |         |      |    |     |  |       |        |            |              |      |   |
| PMI reaction                                                                                                                                                                                                                                                                                                                                                                                                                                                                                                                                                                                                                                                                                                                                                       | 6,2          |               |            |          |          |          |                                          |                        |                       |                                        |                        |              |      |               |  |       |      |            |       |    |      |     |      |    |      |           |       |              |     |               |     |         |     |            |       |          |      |         |      |         |      |    |     |  |       |        |            |              |      |   |
| reagent catal                                                                                                                                                                                                                                                                                                                                                                                                                                                                                                                                                                                                                                                                                                                                                      | 2,0          |               |            |          |          |          |                                          |                        |                       |                                        |                        |              |      |               |  |       |      |            |       |    |      |     |      |    |      |           |       |              |     |               |     |         |     |            |       |          |      |         |      |         |      |    |     |  |       |        |            |              |      |   |
| solvent                                                                                                                                                                                                                                                                                                                                                                                                                                                                                                                                                                                                                                                                                                                                                            | 4,1          |               |            |          |          |          |                                          |                        |                       |                                        |                        |              |      |               |  |       |      |            |       |    |      |     |      |    |      |           |       |              |     |               |     |         |     |            |       |          |      |         |      |         |      |    |     |  |       |        |            |              |      |   |
| PMI Workup                                                                                                                                                                                                                                                                                                                                                                                                                                                                                                                                                                                                                                                                                                                                                         | 106,0        |               |            |          |          |          |                                          |                        |                       |                                        |                        |              |      |               |  |       |      |            |       |    |      |     |      |    |      |           |       |              |     |               |     |         |     |            |       |          |      |         |      |         |      |    |     |  |       |        |            |              |      |   |
| chemical                                                                                                                                                                                                                                                                                                                                                                                                                                                                                                                                                                                                                                                                                                                                                           | 10,4         |               |            |          |          |          |                                          |                        |                       |                                        |                        |              |      |               |  |       |      |            |       |    |      |     |      |    |      |           |       |              |     |               |     |         |     |            |       |          |      |         |      |         |      |    |     |  |       |        |            |              |      |   |
| solvent                                                                                                                                                                                                                                                                                                                                                                                                                                                                                                                                                                                                                                                                                                                                                            | 95,6         |               |            |          |          |          |                                          |                        |                       |                                        |                        |              |      |               |  |       |      |            |       |    |      |     |      |    |      |           |       |              |     |               |     |         |     |            |       |          |      |         |      |         |      |    |     |  |       |        |            |              |      |   |
| Product                                                                                                                                                                                                                                                                                                                                                                                                                                                                                                                                                                                                                                                                                                                                                            | Mass         | MW            | Mol        |          |          |          |                                          |                        |                       |                                        |                        |              |      |               |  |       |      |            |       |    |      |     |      |    |      |           |       |              |     |               |     |         |     |            |       |          |      |         |      |         |      |    |     |  |       |        |            |              |      |   |
|                                                                                                                                                                                                                                                                                                                                                                                                                                                                                                                                                                                                                                                                                                                                                                    | 0,192        | 268,29        | 0,00071564 |          |          |          |                                          |                        |                       |                                        |                        |              |      |               |  |       |      |            |       |    |      |     |      |    |      |           |       |              |     |               |     |         |     |            |       |          |      |         |      |         |      |    |     |  |       |        |            |              |      |   |
| Unreacted li                                                                                                                                                                                                                                                                                                                                                                                                                                                                                                                                                                                                                                                                                                                                                       | mass         | 0             |            |          |          |          |                                          |                        |                       |                                        |                        |              |      |               |  |       |      |            |       |    |      |     |      |    |      |           |       |              |     |               |     |         |     |            |       |          |      |         |      |         |      |    |     |  |       |        |            |              |      |   |

**Figure 6:** Green Metrics for the greener procedure applied on the synthesis of compound **2a**.

| Reactant (Lir Mass (g))                                                                                                                                                                                                                                                                                                                                                                                                                                                                                                                                                                                                                                                                                                                                                                                    | MW           | Mol           | Catalyst   | Mass (g) | Reagent  | Mass (g) | Reaction Solv. Volume (cm <sup>3</sup> ) | Density (g m Mass (g)) | Work up che Mass (g) | Work up solv Volume (cm <sup>3</sup> ) | Density (g m Mass (g)) |              |      |               |  |           |      |       |      |            |       |    |      |     |      |    |      |           |       |              |     |              |     |         |     |            |       |          |      |         |       |         |      |    |     |  |       |        |           |              |      |   |
|------------------------------------------------------------------------------------------------------------------------------------------------------------------------------------------------------------------------------------------------------------------------------------------------------------------------------------------------------------------------------------------------------------------------------------------------------------------------------------------------------------------------------------------------------------------------------------------------------------------------------------------------------------------------------------------------------------------------------------------------------------------------------------------------------------|--------------|---------------|------------|----------|----------|----------|------------------------------------------|------------------------|----------------------|----------------------------------------|------------------------|--------------|------|---------------|--|-----------|------|-------|------|------------|-------|----|------|-----|------|----|------|-----------|-------|--------------|-----|--------------|-----|---------|-----|------------|-------|----------|------|---------|-------|---------|------|----|-----|--|-------|--------|-----------|--------------|------|---|
| Phosphonate                                                                                                                                                                                                                                                                                                                                                                                                                                                                                                                                                                                                                                                                                                                                                                                                | 0,296        | 296,35        | 0,00099882 |          | EtOH     | 1        | 0,789                                    | 0,789                  | HCl                  | 0,185                                  | Water                  | 10           | 1    | 10            |  |           |      |       |      |            |       |    |      |     |      |    |      |           |       |              |     |              |     |         |     |            |       |          |      |         |       |         |      |    |     |  |       |        |           |              |      |   |
| NaOH                                                                                                                                                                                                                                                                                                                                                                                                                                                                                                                                                                                                                                                                                                                                                                                                       | 0,096        | 40            | 0,0024     |          |          |          |                                          |                        | NaCl                 | 1,5                                    | EtOAc                  | 35           | 0,89 | 31,15         |  |           |      |       |      |            |       |    |      |     |      |    |      |           |       |              |     |              |     |         |     |            |       |          |      |         |       |         |      |    |     |  |       |        |           |              |      |   |
|                                                                                                                                                                                                                                                                                                                                                                                                                                                                                                                                                                                                                                                                                                                                                                                                            |              |               | #DIV/0!    |          |          |          |                                          |                        | MgSO <sub>4</sub>    | 1,5                                    |                        |              |      | 0             |  |           |      |       |      |            |       |    |      |     |      |    |      |           |       |              |     |              |     |         |     |            |       |          |      |         |       |         |      |    |     |  |       |        |           |              |      |   |
|                                                                                                                                                                                                                                                                                                                                                                                                                                                                                                                                                                                                                                                                                                                                                                                                            |              |               | #DIV/0!    |          |          |          |                                          |                        |                      |                                        |                        |              |      | 0             |  |           |      |       |      |            |       |    |      |     |      |    |      |           |       |              |     |              |     |         |     |            |       |          |      |         |       |         |      |    |     |  |       |        |           |              |      |   |
|                                                                                                                                                                                                                                                                                                                                                                                                                                                                                                                                                                                                                                                                                                                                                                                                            |              |               | #DIV/0!    |          |          |          |                                          |                        |                      |                                        |                        |              |      | 0             |  |           |      |       |      |            |       |    |      |     |      |    |      |           |       |              |     |              |     |         |     |            |       |          |      |         |       |         |      |    |     |  |       |        |           |              |      |   |
|                                                                                                                                                                                                                                                                                                                                                                                                                                                                                                                                                                                                                                                                                                                                                                                                            |              |               | #DIV/0!    |          |          |          |                                          |                        |                      |                                        |                        |              |      | 0             |  |           |      |       |      |            |       |    |      |     |      |    |      |           |       |              |     |              |     |         |     |            |       |          |      |         |       |         |      |    |     |  |       |        |           |              |      |   |
|                                                                                                                                                                                                                                                                                                                                                                                                                                                                                                                                                                                                                                                                                                                                                                                                            |              |               | #DIV/0!    |          |          |          |                                          |                        |                      |                                        |                        |              |      | 0             |  |           |      |       |      |            |       |    |      |     |      |    |      |           |       |              |     |              |     |         |     |            |       |          |      |         |       |         |      |    |     |  |       |        |           |              |      |   |
|                                                                                                                                                                                                                                                                                                                                                                                                                                                                                                                                                                                                                                                                                                                                                                                                            |              |               | #DIV/0!    |          |          |          |                                          |                        |                      |                                        |                        |              |      | 0             |  |           |      |       |      |            |       |    |      |     |      |    |      |           |       |              |     |              |     |         |     |            |       |          |      |         |       |         |      |    |     |  |       |        |           |              |      |   |
|                                                                                                                                                                                                                                                                                                                                                                                                                                                                                                                                                                                                                                                                                                                                                                                                            |              |               | #DIV/0!    |          |          |          |                                          |                        |                      |                                        |                        |              |      | 0             |  |           |      |       |      |            |       |    |      |     |      |    |      |           |       |              |     |              |     |         |     |            |       |          |      |         |       |         |      |    |     |  |       |        |           |              |      |   |
| <b>Total</b>                                                                                                                                                                                                                                                                                                                                                                                                                                                                                                                                                                                                                                                                                                                                                                                               | <b>0,392</b> | <b>336,35</b> |            | <b>0</b> | <b>0</b> | <b>0</b> | <b>0,789</b>                             |                        | <b>3,185</b>         |                                        |                        | <b>41,15</b> |      | <b>45,516</b> |  |           |      |       |      |            |       |    |      |     |      |    |      |           |       |              |     |              |     |         |     |            |       |          |      |         |       |         |      |    |     |  |       |        |           |              |      |   |
| $RME = \frac{\text{mass of isolated product}}{\text{total mass of reactants}} \times 100$ $AE = \frac{\text{molecular weight of product}}{\text{total molecular weight of reactants}} \times 100$ $\text{mass intensity} = \frac{\text{total mass in a process or process step}}{\text{mass of product}}$ $OE = \frac{RME}{AE} \times 100$                                                                                                                                                                                                                                                                                                                                                                                                                                                                 |              |               |            |          |          |          |                                          |                        |                      |                                        |                        |              |      |               |  |           |      |       |      |            |       |    |      |     |      |    |      |           |       |              |     |              |     |         |     |            |       |          |      |         |       |         |      |    |     |  |       |        |           |              |      |   |
| <table border="1"> <tr><td>Eco-Scale</td><td>73,5</td></tr> <tr><td>Yield</td><td>69,0</td></tr> <tr><td>Conversion</td><td>100,0</td></tr> <tr><td>AE</td><td>79,8</td></tr> <tr><td>RME</td><td>47,2</td></tr> <tr><td>OE</td><td>59,2</td></tr> <tr><td>PMI Total</td><td>246,0</td></tr> <tr><td>PMI reaction</td><td>6,4</td></tr> <tr><td>reagent cata</td><td>2,1</td></tr> <tr><td>solvent</td><td>4,3</td></tr> <tr><td>PMI Workup</td><td>239,8</td></tr> <tr><td>chemical</td><td>17,2</td></tr> <tr><td>solvent</td><td>222,4</td></tr> </table> <table border="1"> <tr><th>Product</th><th>Mass</th><th>MW</th><th>Mol</th></tr> <tr><td></td><td>0,185</td><td>268,29</td><td>0,0006896</td></tr> </table> <table border="1"> <tr><td>Unreacted li</td><td>mass</td><td>0</td></tr> </table> |              |               |            |          |          |          |                                          |                        |                      |                                        |                        |              |      |               |  | Eco-Scale | 73,5 | Yield | 69,0 | Conversion | 100,0 | AE | 79,8 | RME | 47,2 | OE | 59,2 | PMI Total | 246,0 | PMI reaction | 6,4 | reagent cata | 2,1 | solvent | 4,3 | PMI Workup | 239,8 | chemical | 17,2 | solvent | 222,4 | Product | Mass | MW | Mol |  | 0,185 | 268,29 | 0,0006896 | Unreacted li | mass | 0 |
| Eco-Scale                                                                                                                                                                                                                                                                                                                                                                                                                                                                                                                                                                                                                                                                                                                                                                                                  | 73,5         |               |            |          |          |          |                                          |                        |                      |                                        |                        |              |      |               |  |           |      |       |      |            |       |    |      |     |      |    |      |           |       |              |     |              |     |         |     |            |       |          |      |         |       |         |      |    |     |  |       |        |           |              |      |   |
| Yield                                                                                                                                                                                                                                                                                                                                                                                                                                                                                                                                                                                                                                                                                                                                                                                                      | 69,0         |               |            |          |          |          |                                          |                        |                      |                                        |                        |              |      |               |  |           |      |       |      |            |       |    |      |     |      |    |      |           |       |              |     |              |     |         |     |            |       |          |      |         |       |         |      |    |     |  |       |        |           |              |      |   |
| Conversion                                                                                                                                                                                                                                                                                                                                                                                                                                                                                                                                                                                                                                                                                                                                                                                                 | 100,0        |               |            |          |          |          |                                          |                        |                      |                                        |                        |              |      |               |  |           |      |       |      |            |       |    |      |     |      |    |      |           |       |              |     |              |     |         |     |            |       |          |      |         |       |         |      |    |     |  |       |        |           |              |      |   |
| AE                                                                                                                                                                                                                                                                                                                                                                                                                                                                                                                                                                                                                                                                                                                                                                                                         | 79,8         |               |            |          |          |          |                                          |                        |                      |                                        |                        |              |      |               |  |           |      |       |      |            |       |    |      |     |      |    |      |           |       |              |     |              |     |         |     |            |       |          |      |         |       |         |      |    |     |  |       |        |           |              |      |   |
| RME                                                                                                                                                                                                                                                                                                                                                                                                                                                                                                                                                                                                                                                                                                                                                                                                        | 47,2         |               |            |          |          |          |                                          |                        |                      |                                        |                        |              |      |               |  |           |      |       |      |            |       |    |      |     |      |    |      |           |       |              |     |              |     |         |     |            |       |          |      |         |       |         |      |    |     |  |       |        |           |              |      |   |
| OE                                                                                                                                                                                                                                                                                                                                                                                                                                                                                                                                                                                                                                                                                                                                                                                                         | 59,2         |               |            |          |          |          |                                          |                        |                      |                                        |                        |              |      |               |  |           |      |       |      |            |       |    |      |     |      |    |      |           |       |              |     |              |     |         |     |            |       |          |      |         |       |         |      |    |     |  |       |        |           |              |      |   |
| PMI Total                                                                                                                                                                                                                                                                                                                                                                                                                                                                                                                                                                                                                                                                                                                                                                                                  | 246,0        |               |            |          |          |          |                                          |                        |                      |                                        |                        |              |      |               |  |           |      |       |      |            |       |    |      |     |      |    |      |           |       |              |     |              |     |         |     |            |       |          |      |         |       |         |      |    |     |  |       |        |           |              |      |   |
| PMI reaction                                                                                                                                                                                                                                                                                                                                                                                                                                                                                                                                                                                                                                                                                                                                                                                               | 6,4          |               |            |          |          |          |                                          |                        |                      |                                        |                        |              |      |               |  |           |      |       |      |            |       |    |      |     |      |    |      |           |       |              |     |              |     |         |     |            |       |          |      |         |       |         |      |    |     |  |       |        |           |              |      |   |
| reagent cata                                                                                                                                                                                                                                                                                                                                                                                                                                                                                                                                                                                                                                                                                                                                                                                               | 2,1          |               |            |          |          |          |                                          |                        |                      |                                        |                        |              |      |               |  |           |      |       |      |            |       |    |      |     |      |    |      |           |       |              |     |              |     |         |     |            |       |          |      |         |       |         |      |    |     |  |       |        |           |              |      |   |
| solvent                                                                                                                                                                                                                                                                                                                                                                                                                                                                                                                                                                                                                                                                                                                                                                                                    | 4,3          |               |            |          |          |          |                                          |                        |                      |                                        |                        |              |      |               |  |           |      |       |      |            |       |    |      |     |      |    |      |           |       |              |     |              |     |         |     |            |       |          |      |         |       |         |      |    |     |  |       |        |           |              |      |   |
| PMI Workup                                                                                                                                                                                                                                                                                                                                                                                                                                                                                                                                                                                                                                                                                                                                                                                                 | 239,8        |               |            |          |          |          |                                          |                        |                      |                                        |                        |              |      |               |  |           |      |       |      |            |       |    |      |     |      |    |      |           |       |              |     |              |     |         |     |            |       |          |      |         |       |         |      |    |     |  |       |        |           |              |      |   |
| chemical                                                                                                                                                                                                                                                                                                                                                                                                                                                                                                                                                                                                                                                                                                                                                                                                   | 17,2         |               |            |          |          |          |                                          |                        |                      |                                        |                        |              |      |               |  |           |      |       |      |            |       |    |      |     |      |    |      |           |       |              |     |              |     |         |     |            |       |          |      |         |       |         |      |    |     |  |       |        |           |              |      |   |
| solvent                                                                                                                                                                                                                                                                                                                                                                                                                                                                                                                                                                                                                                                                                                                                                                                                    | 222,4        |               |            |          |          |          |                                          |                        |                      |                                        |                        |              |      |               |  |           |      |       |      |            |       |    |      |     |      |    |      |           |       |              |     |              |     |         |     |            |       |          |      |         |       |         |      |    |     |  |       |        |           |              |      |   |
| Product                                                                                                                                                                                                                                                                                                                                                                                                                                                                                                                                                                                                                                                                                                                                                                                                    | Mass         | MW            | Mol        |          |          |          |                                          |                        |                      |                                        |                        |              |      |               |  |           |      |       |      |            |       |    |      |     |      |    |      |           |       |              |     |              |     |         |     |            |       |          |      |         |       |         |      |    |     |  |       |        |           |              |      |   |
|                                                                                                                                                                                                                                                                                                                                                                                                                                                                                                                                                                                                                                                                                                                                                                                                            | 0,185        | 268,29        | 0,0006896  |          |          |          |                                          |                        |                      |                                        |                        |              |      |               |  |           |      |       |      |            |       |    |      |     |      |    |      |           |       |              |     |              |     |         |     |            |       |          |      |         |       |         |      |    |     |  |       |        |           |              |      |   |
| Unreacted li                                                                                                                                                                                                                                                                                                                                                                                                                                                                                                                                                                                                                                                                                                                                                                                               | mass         | 0             |            |          |          |          |                                          |                        |                      |                                        |                        |              |      |               |  |           |      |       |      |            |       |    |      |     |      |    |      |           |       |              |     |              |     |         |     |            |       |          |      |         |       |         |      |    |     |  |       |        |           |              |      |   |

**Figure 7:** Green Metrics for the batch procedure applied on the synthesis of compound **2a**.

| Our method               |       |        |             |          |         |          |                  |                                   |                      |                                                |
|--------------------------|-------|--------|-------------|----------|---------|----------|------------------|-----------------------------------|----------------------|------------------------------------------------|
| Reactant (Lir Mass (g))  | MW    | Mol    | Catalyst    | Mass (g) | Reagent | Mass (g) | Reaction Solvent | Volume (cm Density (g n Mass (g)) | Work up che Mass (g) | Work up sol Volume (cm3 Density (g n Mass (g)) |
| Phosphonat               | 0,228 | 228,23 | 0,000998992 |          |         |          | EtOH             | 1 0,789 0,789                     | HCl 0,183            | Water 10 1 10                                  |
| NaOH                     | 0,096 | 40     | 0,0024      |          |         |          |                  |                                   | NaCl 1,5             | EtOAc 35 0,89 31,15                            |
|                          |       |        | #DIV/0!     |          |         |          |                  |                                   | MgSO4 1,5            |                                                |
|                          |       |        | #DIV/0!     |          |         |          |                  |                                   |                      |                                                |
|                          |       |        | #DIV/0!     |          |         |          |                  |                                   |                      |                                                |
|                          |       |        | #DIV/0!     |          |         |          |                  |                                   |                      |                                                |
|                          |       |        | #DIV/0!     |          |         |          |                  |                                   |                      |                                                |
|                          |       |        | #DIV/0!     |          |         |          |                  |                                   |                      |                                                |
|                          |       |        | #DIV/0!     |          |         |          |                  |                                   |                      |                                                |
|                          |       |        | #DIV/0!     |          |         |          |                  |                                   |                      |                                                |
| Total                    | 0,324 | 268,23 |             | 0        |         | 0        |                  | 0,789                             | 3,185                | 41,15                                          |
| Eco-Scale 87             |       |        |             |          |         |          |                  |                                   |                      |                                                |
| Yield 98,0               |       |        |             |          |         |          |                  |                                   |                      |                                                |
| Conversion 100,0         |       |        |             |          |         |          |                  |                                   |                      |                                                |
| AE 74,6                  |       |        |             |          |         |          |                  |                                   |                      |                                                |
| RME 60,5                 |       |        |             |          |         |          |                  |                                   |                      |                                                |
| OE 81,1                  |       |        |             |          |         |          |                  |                                   |                      |                                                |
| PMI total 231,9          |       |        |             |          |         |          |                  |                                   |                      |                                                |
| PMI reaction 57 94,3     |       |        |             |          |         |          |                  |                                   |                      |                                                |
| reagent catalyst 1,7     |       |        |             |          |         |          |                  |                                   |                      |                                                |
| solvent 4,0              |       |        |             |          |         |          |                  |                                   |                      |                                                |
| PMI Workup 226,2         |       |        |             |          |         |          |                  |                                   |                      |                                                |
| chemical 16,3            |       |        |             |          |         |          |                  |                                   |                      |                                                |
| solvent 209,9            |       |        |             |          |         |          |                  |                                   |                      |                                                |
| Product Mass MW Mol      |       |        |             |          |         |          |                  |                                   |                      |                                                |
| 0,196 200,17 0,000979168 |       |        |             |          |         |          |                  |                                   |                      |                                                |
| mass                     |       |        |             |          |         |          |                  |                                   |                      |                                                |
| Unreacted lii 0          |       |        |             |          |         |          |                  |                                   |                      |                                                |

  

| Org. Biomol. Chem., 2021, 19, 6007-6014 |          |        |             |          |         |          |                  |                                   |                      |                                                |
|-----------------------------------------|----------|--------|-------------|----------|---------|----------|------------------|-----------------------------------|----------------------|------------------------------------------------|
| Reactant (Lir Mass (g))                 | MW       | Mol    | Catalyst    | Mass (g) | Reagent | Mass (g) | Reaction Solvent | Volume (cm Density (g n Mass (g)) | Work up che Mass (g) | Work up sol Volume (cm3 Density (g n Mass (g)) |
| Phosphonat                              | 0,045646 | 228,23 | 0,0002      |          |         |          | DCM              | 1 1,33 1,33                       | HCl 0,25             | Water 7 1 7                                    |
| TF2O                                    | 0,085    | 282,13 | 0,000300011 |          |         |          |                  |                                   | NaOH 0,028           | Et2O 2 0,713 1,426                             |
| Pyridine                                | 0,032    | 79,1   | 0,0004      |          |         |          |                  |                                   | Na2SO4 1,5           | DCM 30 1,33 39,9                               |
| H2O                                     | 0,072    | 18     | 0,004       |          |         |          |                  |                                   |                      |                                                |
| Total                                   | 0,233928 | 607,46 |             | 0        |         | 0        |                  | 1,33                              | 1,778                | 48,326                                         |
| Eco-Scale 80                            |          |        |             |          |         |          |                  |                                   |                      |                                                |
| Yield 93,7                              |          |        |             |          |         |          |                  |                                   |                      |                                                |
| Conversion 100,0                        |          |        |             |          |         |          |                  |                                   |                      |                                                |
| AE 33,0                                 |          |        |             |          |         |          |                  |                                   |                      |                                                |
| RME 16,9                                |          |        |             |          |         |          |                  |                                   |                      |                                                |
| OE 48,6                                 |          |        |             |          |         |          |                  |                                   |                      |                                                |
| PMI total 1377,8                        |          |        |             |          |         |          |                  |                                   |                      |                                                |
| PMI reaction 41,7 58,3                  |          |        |             |          |         |          |                  |                                   |                      |                                                |
| reagent catalyst 6,2                    |          |        |             |          |         |          |                  |                                   |                      |                                                |
| solvent 35,5                            |          |        |             |          |         |          |                  |                                   |                      |                                                |
| PMI Workup 1336,1                       |          |        |             |          |         |          |                  |                                   |                      |                                                |
| chemical 47,4                           |          |        |             |          |         |          |                  |                                   |                      |                                                |
| solvent 1289,7                          |          |        |             |          |         |          |                  |                                   |                      |                                                |
| Product Mass MW Mol                     |          |        |             |          |         |          |                  |                                   |                      |                                                |
| 0,0375 200,17 0,000187341               |          |        |             |          |         |          |                  |                                   |                      |                                                |
| mass                                    |          |        |             |          |         |          |                  |                                   |                      |                                                |
| Unreacted lii 0                         |          |        |             |          |         |          |                  |                                   |                      |                                                |

  

| Bioorg. Med. Chem. Lett., 2007, 17, 3745-3748 Work up not detailed |         |        |             |          |         |          |                  |                                   |                      |                                                |
|--------------------------------------------------------------------|---------|--------|-------------|----------|---------|----------|------------------|-----------------------------------|----------------------|------------------------------------------------|
| Reactant (Lir Mass (g))                                            | MW      | Mol    | Catalyst    | Mass (g) | Reagent | Mass (g) | Reaction Solvent | Volume (cm Density (g n Mass (g)) | Work up che Mass (g) | Work up sol Volume (cm3 Density (g n Mass (g)) |
| Phosphonat                                                         | 0,015   | 228,23 | 6,57232E-05 |          |         |          | THF              | 0,579 0,89 0,51531                |                      |                                                |
| LHBEt3                                                             | 0,008   | 105,95 | 7,89995E-05 |          |         |          |                  |                                   |                      |                                                |
| Total                                                              | 0,02337 | 334,18 |             | 0        |         | 0        |                  | 0,51531                           | 0                    | 0                                              |
| Eco-Scale 79                                                       |         |        |             |          |         |          |                  |                                   |                      |                                                |
| Yield 78,3                                                         |         |        |             |          |         |          |                  |                                   |                      |                                                |
| Conversion 100,0                                                   |         |        |             |          |         |          |                  |                                   |                      |                                                |
| AE 59,9                                                            |         |        |             |          |         |          |                  |                                   |                      |                                                |
| RME 44,1                                                           |         |        |             |          |         |          |                  |                                   |                      |                                                |
| OE 73,6                                                            |         |        |             |          |         |          |                  |                                   |                      |                                                |
| PMI total 52,3                                                     |         |        |             |          |         |          |                  |                                   |                      |                                                |
| PMI reaction 52,3 47,7                                             |         |        |             |          |         |          |                  |                                   |                      |                                                |
| reagent catalyst 2,3                                               |         |        |             |          |         |          |                  |                                   |                      |                                                |
| solvent 50,0                                                       |         |        |             |          |         |          |                  |                                   |                      |                                                |
| PMI Workup 50,0                                                    |         |        |             |          |         |          |                  |                                   |                      |                                                |
| chemical 0,0                                                       |         |        |             |          |         |          |                  |                                   |                      |                                                |
| solvent 0,0                                                        |         |        |             |          |         |          |                  |                                   |                      |                                                |
| Product Mass MW Mol                                                |         |        |             |          |         |          |                  |                                   |                      |                                                |
| 0,0103 200,17 5,14563E-05                                          |         |        |             |          |         |          |                  |                                   |                      |                                                |
| mass                                                               |         |        |             |          |         |          |                  |                                   |                      |                                                |
| Unreacted lii 0                                                    |         |        |             |          |         |          |                  |                                   |                      |                                                |

  

| Org. Biomol. Chem., 2014, 12, 2592-2595 ON DIBENZYLBENZYLPHOSPHONATE / Work up not detailed |       |         |             |          |         |          |                  |                                   |                      |                                                |
|---------------------------------------------------------------------------------------------|-------|---------|-------------|----------|---------|----------|------------------|-----------------------------------|----------------------|------------------------------------------------|
| Reactant (Lir Mass (g))                                                                     | MW    | Mol     | Catalyst    | Mass (g) | Reagent | Mass (g) | Reaction Solvent | Volume (cm Density (g n Mass (g)) | Work up che Mass (g) | Work up sol Volume (cm3 Density (g n Mass (g)) |
| Phosphonat                                                                                  | 0,765 | 352,37  | 0,002171013 |          |         |          | Acetonitrile     | 40 0,786 31,44                    |                      | MeOH 15 0,792 11,88                            |
| LiBr                                                                                        | 0,377 | 86,845  | 0,004341067 |          |         |          |                  |                                   |                      | Acetonitrile 0,786                             |
| Total                                                                                       | 1,142 | 439,215 |             | 0        |         | 0        |                  | 31,44                             | 0                    | 11,88                                          |
| Eco-Scale 88,5                                                                              |       |         |             |          |         |          |                  |                                   |                      |                                                |
| Yield 95,0                                                                                  |       |         |             |          |         |          |                  |                                   |                      |                                                |
| Conversion 100,0                                                                            |       |         |             |          |         |          |                  |                                   |                      |                                                |
| AE 59,7                                                                                     |       |         |             |          |         |          |                  |                                   |                      |                                                |
| RME 47,4                                                                                    |       |         |             |          |         |          |                  |                                   |                      |                                                |
| OE 79,3                                                                                     |       |         |             |          |         |          |                  |                                   |                      |                                                |
| PMI total 822,2                                                                             |       |         |             |          |         |          |                  |                                   |                      |                                                |
| PMI reaction 69,2 39,8                                                                      |       |         |             |          |         |          |                  |                                   |                      |                                                |
| reagent catalyst 2,1                                                                        |       |         |             |          |         |          |                  |                                   |                      |                                                |
| solvent 58,1                                                                                |       |         |             |          |         |          |                  |                                   |                      |                                                |
| PMI Workup 22,0                                                                             |       |         |             |          |         |          |                  |                                   |                      |                                                |
| chemical 0,0                                                                                |       |         |             |          |         |          |                  |                                   |                      |                                                |
| solvent 229,9                                                                               |       |         |             |          |         |          |                  |                                   |                      |                                                |
| Product Mass MW Mol                                                                         |       |         |             |          |         |          |                  |                                   |                      |                                                |
| 0,541 262,24 0,002062996                                                                    |       |         |             |          |         |          |                  |                                   |                      |                                                |
| mass                                                                                        |       |         |             |          |         |          |                  |                                   |                      |                                                |
| Unreacted lii 0                                                                             |       |         |             |          |         |          |                  |                                   |                      |                                                |

Figure 8: Green Metrics comparison between reported procedure<sup>4-6</sup> and our applied on the synthesis of compound 2b.

## 7. References

- <sup>1</sup> Y. Gök, S. Küloğlu, H. Z. Gök and L. Kekeç, *Appl. Organometal. Chem.*, 2014, **28**, 835–838.
- <sup>2</sup> J. Nasser, E. About-Jaudet and N. Collignon, *Phosphorus Sulfur*, 1990, **1/4**, 171–190.
- <sup>3</sup> M. Kalek, M. Jezowska and J. Stawinski, *Adv.Synth. Catal.*, 2009, **351**, 3207–3216.
- <sup>4</sup> J. Ash, H. Huang, P. Cordero and J. Y. Kang, *Org. Biomol. Chem.*, 2021, **19**, 6007–6014.
- <sup>5</sup> S. Chowdhury, N. J. Muni, N. P. Greenwood, D. R. Pepperberg and R. F. Standaardt, *Bioorg. Med. Chem. Lett.*, 2007, **17**, 3745–3748.
- <sup>6</sup> B. P. Rempel and S.G. Withers, *Org. Biomol. Chem.*, 2014, **12**, 2592–2595.
